# Supplementary material for: Magnitude, frequency and climate forcing of global volcanism during the last glacial period as seen in Greenland and Antarctic ice cores (60–9 ka)
Source: Copernicus journal article supplement (doi:10.5194/cp-18-485-2022), 2022-03-15
Supplement: Supplementary file 1 [file cp-18-485-2022-supplement.zip]

Archive with 6 entries (6 files):
- Supplementary Fig.S2 and Fig.S11.odp
- Supplementary tables.xls
- Captions of supplementary figures and tables.doc
- NGRIP_Sulfate_60-9ka.xlsx
- cp-18-485-2022-supplement-title-page.pdf
- Supplementary Fig. S1.odp
