# Supplementary material for: Magnitude, frequency and climate forcing of global volcanism during the last glacial period as seen in Greenland and Antarctic ice cores (60–9 ka)
Source: Copernicus journal article supplement (doi:10.5194/cp-18-485-2022), 2022-03-15
Supplement: Supplementary file 1 [file cp-18-485-2022-supplement.zip › cp-18-485-2022-supplement-title-page.pdf]

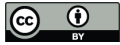

## *Supplement of*

# **Magnitude, frequency and climate forcing of global volcanism during the last glacial period as seen in Greenland and Antarctic ice cores (60–9 ka)**

**Jiamei Lin et al.**

*Correspondence to:* Jiamei Lin (jm.lin@nbi.ku.dk) and Anders Svensson (as@nbi.ku.dk)

- cp-18-485-2022-supplement-title-page.pdf
- Captions of supplementary figures and tables.doc
- NGRIP\_Sulfate\_60-9ka.xlsx
- Supplementary Fig. S1.odp
- Supplementary Fig.S2 and Fig.S11.odp
- Supplementary tables.xls

The copyright of individual parts of the supplement might differ from the article licence.
