# Supplementary material for: Magnitude, frequency and climate forcing of global volcanism during the last glacial period as seen in Greenland and Antarctic ice cores (60–9 ka)
Source: Copernicus journal article supplement (doi:10.5194/cp-18-485-2022), 2022-03-15
Supplement: Supplementary file 1 [file cp-18-485-2022-supplement.zip › NGRIP_Sulfate_60-9ka.xlsx]

## Sheet: Sheet1
% NGRIP sulfate record is measured by a Continuous Flow Analysis system (CFA)
%
% REFERENCE of NGRIP sulfate record:
%
% Bigler, M.: Hochauflösende Spurenstoffmessungen an polaren Eisbohrkernen: Glazio-chemische und klimatische Prozessstudien, 2004. Ph.D. dissertation, Physics Institute, University of Bern, Switzerland, 2004.
% Lin, J., Svensson, A., Hvidberg, C. S., Lohmann, J., Kristiansen, S., Dahl-Jensen, D., Steffensen, J. P., Rasmussen, S. O., Cook, E., Kjær, H. A., Vinther, B. M., Fischer, H., Stocker, T., Sigl, M., Bigler, M., Severi, M., Traversi, R., and Mulvaney, R.: Magnitude, frequency and climate forcing of global volcanism during the last glacial period as seen in Greenland and Antarctic ice cores (60–9…
%
% The Greenland time scale is Greenland Ice Core Chronology 2005 (GICC05)
%
% REFERENCES of GICC05
%
% The dating of the 7.9-14.7 ka b2k part is described in the paper:
% S.O. Rasmussen, K.K. Andersen, A.M. Svensson, J.P. Steffensen, B.M. Vinther, H.B. Clausen, % M.-L. Siggaard-Andersen, S.J. Johnsen, L.B. Larsen, D. Dahl-Jensen, M. Bigler, R. Röthlisberger, H. Fischer, K. Goto-Azuma, M.E. Hansson, and U. Ruth. A new Greenland ice core chronology for the last glacial termination. J. Geophys. Res., vol. 111, D06102, 2006, doi:10.1029/2005JD006079
%
% The dating of the 14.7-41.8 ka b2k part is described in the two papers:
% K.K. Andersen, A. Svensson, S.J. Johnsen, S.O. Rasmussen, M. Bigler, R. Röthlisberger, U. Ruth, M.-L. Siggaard-Andersen, J.P. Steffensen, D. Dahl-Jensen, B.M. Vinther, and H.B. Clausen. The Greenland Ice Core Chronology 2005, 15-42 ka. Part 1: Constructing the time scale. Quaternary Science Reviews, 25, 3246-3257, 2006. doi:10.1016/j.quascirev.2006.08.002
% A. Svensson, K.K. Andersen, M. Bigler, H.B. Clausen, D. Dahl-Jensen, S.M. Davies, S.J. Johnsen, R. Muscheler, S.O. Rasmussen, R. Röthlisberger, J.P. Steffensen, and B.M. Vinther. The Greenland Ice Core Chronology 2005, 15-42 ka. Part 2: Comparison to other records. Quaternary Science Reviews, 25, 3258-3267, 2006. doi:10.1016/j.quascirev.2006.08.003
%
% The dating of the 41.8-60.0 ka b2k part is described in the paper:
% A. Svensson, K.K. Andersen, M. Bigler, H.B. Clausen, D. Dahl-Jensen, S.M. Davies, S.J. Johnsen, R. Muscheler, F. Parrenin, S.O. Rasmussen, R. Röthlisberger, I. Seierstad, J.P. Steffensen, and B.M. Vinther. A 60 000 year Greenland stratigraphic ice core chronology. Climate of the Past, 4, 47–57, 2008
%
Age	NGRIP_depth	Sulfate
(yr b2k)	(m)	(ppb)
10275.9	1404.72	3.58
10275.9	1404.73	8.67
10275.9	1404.73	13.35
10275.9	1404.73	12.52
10275.9	1404.73	13.78
10275.9	1404.73	8.48
10275.9	1404.73
10275.9	1404.73
10276	1404.73
10276	1404.73
10276	1404.73
10276	1404.74
10276	1404.74	24.44
10276	1404.74	28.2
10276	1404.74	25.92
10276.1	1404.74	27.71
10276.1	1404.74	28.71
10276.1	1404.74	30.36
10276.1	1404.74	26
10276.1	1404.74	27.92
10276.1	1404.74	26.95
10276.1	1404.75	33.19
10276.1	1404.75	36.54
10276.2	1404.75	33.75
10276.2	1404.75	32.79
10276.2	1404.75	36.4
10276.2	1404.75	39.23
10276.2	1404.75	33.69
10276.2	1404.75	28.15
10276.2	1404.75	26.8
10276.3	1404.76	25.97
10276.3	1404.76	23.95
10276.3	1404.76	15.65
10276.3	1404.76	20.32
10276.3	1404.76	15.29
10276.3	1404.76	15.12
10276.3	1404.76	12.84
10276.3	1404.76	12.27
10276.4	1404.76	2.49
10276.4	1404.76	5.6
10276.4	1404.77	8.19
10276.4	1404.77	8.53
10276.4	1404.77	9.41
10276.4	1404.77	2.8
10276.4	1404.77	6.18
10276.4	1404.77	16.88
10276.5	1404.77	15
10276.5	1404.77	5.62
10276.5	1404.77	11.76
10276.5	1404.77	16.3
10276.5	1404.78	18.49
10276.5	1404.78	17.13
10276.5	1404.78	19.44
10276.6	1404.78	16.51
10276.6	1404.78	13.31
10276.6	1404.78	15.65
10276.6	1404.78	13.89
10276.6	1404.78	2.15
10276.6	1404.78	15.24
10276.6	1404.78	16.62
10276.6	1404.79	8.31
10276.7	1404.79	19.3
10276.7	1404.79	14.93
10276.7	1404.79	5.93
10276.7	1404.79	19.15
10276.7	1404.79	21.21
10276.7	1404.79	15.13
10276.7	1404.79	20.33
10276.7	1404.79	14.12
10276.8	1404.79	19.45
10276.8	1404.8	22.83
10276.8	1404.8	15.57
10276.8	1404.8	12.51
10276.8	1404.8	14.43
10276.8	1404.8	15.04
10276.8	1404.8	10.4
10276.9	1404.8	0.5
10276.9	1404.8
10276.9	1404.8
10276.9	1404.8	3.51
10276.9	1404.81	8.99
10276.9	1404.81	2.76
10276.9	1404.81	9.16
10276.9	1404.81	11.75
10277	1404.81	17.61
10277	1404.81	15.07
10277	1404.81	17.91
10277	1404.81	14.98
10277	1404.81	22.4
10277	1404.81	24.84
10277	1404.82	23.09
10277.1	1404.82	27.11
10277.1	1404.82	32.29
10277.1	1404.82	25.18
10277.1	1404.82	25
10277.1	1404.82	23.78
10277.1	1404.82	18.49
10277.1	1404.82	18.97
10277.1	1404.82	21.56
10277.2	1404.82	19.94
10277.2	1404.83	18.59
10277.2	1404.83	21.16
10277.2	1404.83	19.28
10277.2	1404.83	19.77
10277.2	1404.83	22.61
10277.2	1404.83	23.61
10277.2	1404.83	22.51
10277.3	1404.83	19.18
10277.3	1404.83	17.69
10277.3	1404.83	18.45
10277.3	1404.84	28.74
10277.3	1404.84	24.9
10277.3	1404.84	27.08
10277.3	1404.84	22.96
10277.4	1404.84	29.19
10277.4	1404.84	14.5
10277.4	1404.84	16.55
10277.4	1404.84	12.29
10277.4	1404.84	14.08
10277.4	1404.84	12.74
10277.4	1404.85	8.62
10277.4	1404.85	6.34
10277.5	1404.85
10277.5	1404.85
10277.5	1404.85	3.57
10277.5	1404.85	2.21
10277.5	1404.85	4.93
10277.5	1404.85	3.42
10277.5	1404.85
10277.6	1404.85
10277.6	1404.86	3.13
10277.6	1404.86	7.28
10277.6	1404.86	4.73
10277.6	1404.86	5.61
10277.6	1404.86	14.35
10277.6	1404.86	12.6
10277.6	1404.86	9.79
10277.7	1404.86	14.2
10277.7	1404.86	8.64
10277.7	1404.86	11.48
10277.7	1404.87	15.9
10277.7	1404.87	15.57
10277.7	1404.87	14.74
10277.7	1404.87	11.94
10277.8	1404.87	8.09
10277.8	1404.87	9.11
10277.8	1404.87	13.52
10277.8	1404.87	13.06
10277.8	1404.87	2.38
10277.8	1404.87	10.48
10277.8	1404.88	9.38
10277.8	1404.88	7.1
10277.9	1404.88	15.7
10277.9	1404.88	22.6
10277.9	1404.88	29.61
10277.9	1404.88	32.44
10277.9	1404.88	34.48
10277.9	1404.88	37.57
10277.9	1404.88	42.34
10277.9	1404.88	45.55
10278	1404.88	46.3
10278	1404.89	46.26
10278	1404.89	37.33
10278	1404.89	38.85
10278	1404.89	30.19
10278	1404.89	25.44
10278	1404.89	23.96
10278.1	1404.89	22.47
10278.1	1404.89	12.6
10278.1	1404.89	15.42
10278.1	1404.89	10.26
10278.1	1404.9	8.12
10278.1	1404.9	15.41
10278.1	1404.9	12.48
10278.1	1404.9	18.99
10278.2	1404.9	12.65
10278.2	1404.9	15.61
10278.2	1404.9	18.57
10278.2	1404.9	12.89
10278.2	1404.9	12.45
10278.2	1404.9	5.06
10278.2	1404.91	11.84
10278.2	1404.91	10.61
10278.3	1404.91	12
10278.3	1404.91	6.05
10278.3	1404.91	8.35
10278.3	1404.91	0.41
10278.3	1404.91	8.38
10278.3	1404.91	3.34
10278.3	1404.91	10.65
10278.4	1404.91	11.12
10278.4	1404.92	10.55
10278.4	1404.92	15.88
10278.4	1404.92	14.13
10278.4	1404.92	16.05
10278.4	1404.92	15.35
10278.4	1404.92	15.7
10278.4	1404.92	9.47
10278.5	1404.92	14.41
10278.5	1404.92	9.51
10278.5	1404.92	10.76
10278.5	1404.93	11.89
10278.5	1404.93	7.52
10278.5	1404.93	6.03
10278.5	1404.93	5.59
10278.6	1404.93	5.15
10278.6	1404.93	7.6
10278.6	1404.93	7.68
10278.6	1404.93	15.24
10278.6	1404.93	13.34
10278.6	1404.93	14.08
10278.6	1404.94	16.92
10278.6	1404.94
10278.7	1404.94
10278.7	1404.94	16.26
10278.7	1404.94	9.39
10278.7	1404.94	19.55
10278.7	1404.94	10.34
10278.7	1404.94	11.35
10278.7	1404.94	10.91
10278.8	1404.94	9.54
10278.8	1404.95	10.67
10278.8	1404.95	11.41
10278.8	1404.95
10278.8	1404.95
10278.8	1404.95	14.8
10278.8	1404.95	20.12
10278.8	1404.95	13.4
10278.9	1404.95	17.15
10278.9	1404.95	20.11
10278.9	1404.95	12.34
10278.9	1404.96	24.33
10278.9	1404.96	25.86
10278.9	1404.96	15.34
10278.9	1404.96	20.12
10278.9	1404.96	19.16
10279	1404.96	26.44
10279	1404.96	26.13
10279	1404.96	28.31
10279	1404.96	29.43
10279	1404.96	34.74
10279	1404.97	32.47
10279	1404.97	36.99
10279.1	1404.97	37.6
10279.1	1404.97	40.68
10279.1	1404.97	37.76
10279.1	1404.97	38.63
10279.1	1404.97	43.92
10279.1	1404.97
10279.1	1404.97
10279.1	1404.97
10279.2	1404.98	40.34
10279.2	1404.98	38.73
10279.2	1404.98	39.85
10279.2	1404.98	40.2
10279.2	1404.98	36.63
10279.2	1404.98	40.37
10279.2	1404.98	25.71
10279.2	1404.98	26.3
10279.3	1404.98	17.5
10279.3	1404.98	20.2
10279.3	1404.99	11.23
10279.3	1404.99	14.99
10279.3	1404.99	12.45
10279.3	1404.99	8.98
10279.3	1404.99	10.9
10279.4	1404.99	14.01
10279.4	1404.99	14.62
10279.4	1404.99	9.19
10279.4	1404.99	9.78
10279.4	1404.99	9.34
10279.4	1405	15.59
10279.4	1405	13.97
10279.4	1405	8.42
10279.5	1405	15.18
10279.5	1405	16.18
10279.5	1405	13.78
10279.5	1405	10.85
10279.5	1405	16.83
10279.5	1405	12.07
10279.5	1405.01	15.17
10279.6	1405.01	21.66
10279.6	1405.01	23.3
10279.6	1405.01	27.56
10279.6	1405.01	33.39
10279.6	1405.01	30.6
10279.6	1405.01	33.29
10279.6	1405.01	32.32
10279.6	1405.01	33.32
10279.7	1405.01	30.66
10279.7	1405.02	35.31
10279.7	1405.02	34.22
10279.7	1405.02	35.22
10279.7	1405.02	30.22
10279.7	1405.02	37.47
10279.7	1405.02	22.03
10279.8	1405.02	24.19
10279.8	1405.02	24.27
10279.8	1405.02	12.45
10279.8	1405.02	17.64
10279.8	1405.03	20.74
10279.8	1405.03	19.38
10279.8	1405.03	24.43
10279.8	1405.03	20.34
10279.9	1405.03	23.55
10279.9	1405.03	20.77
10279.9	1405.03	24.12
10279.9	1405.03	20.15
10279.9	1405.03	20.63
10279.9	1405.03	23.7
10279.9	1405.04	23.65
10279.9	1405.04	23.61
10280	1405.04	25.91
10280	1405.04	16.06
10280	1405.04	15.87
10280	1405.04	19.23
10280	1405.04	15.12
10280	1405.04	22.53
10280	1405.04	22.75
10280.1	1405.04	20.87
10280.1	1405.05	22
10280.1	1405.05	22.61
10280.1	1405.05	23.34
10280.1	1405.05	32.16
10280.1	1405.05	23.76
10280.1	1405.05	31.02
10280.2	1405.05	34.1
10280.2	1405.05	40.17
10280.2	1405.05	45.2
10280.2	1405.05	43.33
10280.2	1405.06	41.99
10280.2	1405.06	42.46
10280.2	1405.06	42.16
10280.3	1405.06	40.94
10280.3	1405.06	33.99
10280.3	1405.06	30.95
10280.3	1405.06	28.42
10280.3	1405.06	23.94
10280.3	1405.06	27.66
10280.3	1405.06	19.13
10280.4	1405.07	21.7
10280.4	1405.07	20.85
10280.4	1405.07	20.54
10280.4	1405.07	18.68
10280.4	1405.07	18.37
10280.4	1405.07	16.24
10280.4	1405.07	15.14
10280.5	1405.07	17.04
10280.5	1405.07	10.32
10280.5	1405.07	6.87
10280.5	1405.08	13.75
10280.5	1405.08	13.83
10280.5	1405.08	12.87
10280.5	1405.08	18.19
10280.6	1405.08	13.96
10280.6	1405.08	18.36
10280.6	1405.08	20.14
10280.6	1405.08	15.13
10280.6	1405.08	20.44
10280.6	1405.08	17.63
10280.6	1405.09	22.03
10280.7	1405.09	18.85
10280.7	1405.09	17.5
10280.7	1405.09	23.72
10280.7	1405.09	25.5
10280.7	1405.09	21.15
10280.7	1405.09	19.39
10280.7	1405.09	24.56
10280.8	1405.09	30.26
10280.8	1405.09	30.45
10280.8	1405.1	27.54
10280.8	1405.1	28.03
10280.8	1405.1	26.03
10280.8	1405.1	25.05
10280.8	1405.1	29.96
10280.9	1405.1	29.92
10280.9	1405.1	28.05
10280.9	1405.1	23.95
10280.9	1405.1	27.55
10280.9	1405.1	31.8
10280.9	1405.11	27.58
10280.9	1405.11	28.3
10281	1405.11	26.43
10281	1405.11	28.34
10281	1405.11	31.29
10281	1405.11	33.72
10281	1405.11	33.79
10281	1405.11	26.97
10281	1405.11	29.66
10281.1	1405.11	30.79
10281.1	1405.12	34.39
10281.1	1405.12	26
10281.1	1405.12	28.17
10281.1	1405.12	29.8
10281.1	1405.12	21.93
10281.1	1405.12	22.54
10281.2	1405.12	26.01
10281.2	1405.12	29.49
10281.2	1405.12	27.49
10281.2	1405.12	23.42
10281.2	1405.12	21.36
10281.2	1405.13	24.06
10281.2	1405.13	26.23
10281.3	1405.13	25.27
10281.3	1405.13	22.22
10281.3	1405.13	24.52
10281.3	1405.13	23.17
10281.3	1405.13	25.21
10281.3	1405.13	27.24
10281.3	1405.13	25.63
10281.4	1405.13	25.45
10281.4	1405.14	25.8
10281.4	1405.14	23.27
10281.4	1405.14	27.27
10281.4	1405.14	31.39
10281.4	1405.14	31.85
10281.4	1405.14	28.42
10281.5	1405.14	26.54
10281.5	1405.14	28.96
10281.5	1405.14	37.64
10281.5	1405.14	25.74
10281.5	1405.15	29.72
10281.5	1405.15	27.59
10281.5	1405.15	21.02
10281.6	1405.15	24.37
10281.6	1405.15	30.97
10281.6	1405.15	27.66
10281.6	1405.15	21.61
10281.6	1405.15	26.12
10281.6	1405.15	23.32
10281.6	1405.15	27.95
10281.7	1405.16	28.93
10281.7	1405.16	28.63
10281.7	1405.16	24.93
10281.7	1405.16	17.05
10281.7	1405.16	19.36
10281.7	1405.16	20.6
10281.7	1405.16	19.25
10281.8	1405.16	21.81
10281.8	1405.16	28.14
10281.8	1405.16	20.92
10281.8	1405.17	24.14
10281.8	1405.17	22.51
10281.8	1405.17	25.47
10281.8	1405.17	22.28
10281.9	1405.17	27.2
10281.9	1405.17	27.28
10281.9	1405.17	30.75
10281.9	1405.17	31.49
10281.9	1405.17	28.82
10281.9	1405.17	36.85
10281.9	1405.18	27.82
10282	1405.18	28.02
10282	1405.18	33.31
10282	1405.18	36.13
10282	1405.18	38.94
10282	1405.18	43.05
10282	1405.18	44.29
10282	1405.18	43.72
10282.1	1405.18	48.74
10282.1	1405.18	47.78
10282.1	1405.19	49.16
10282.1	1405.19	42.24
10282.1	1405.19	51.28
10282.1	1405.19	45.64
10282.1	1405.19	45.96
10282.2	1405.19	47.48
10282.2	1405.19	41.33
10282.2	1405.19	41.65
10282.2	1405.19	40.83
10282.2	1405.19	36.75
10282.2	1405.2	34.24
10282.2	1405.2	27.93
10282.3	1405.2	29.28
10282.3	1405.2	27.66
10282.3	1405.2	28.64
10282.3	1405.2	25.84
10282.3	1405.2	22.26
10282.3	1405.2	21.94
10282.3	1405.2	28.54
10282.4	1405.2	25.88
10282.4	1405.21	21.14
10282.4	1405.21	24.49
10282.4	1405.21	30.68
10282.4	1405.21	27.51
10282.4	1405.21	34.36
10282.4	1405.21	33.4
10282.5	1405.21	29.84
10282.5	1405.21	32.52
10282.5	1405.21	31.8
10282.5	1405.21	38.13
10282.5	1405.22	34.96
10282.5	1405.22	28.41
10282.5	1405.22	32.4
10282.6	1405.22	31.69
10282.6	1405.22	33.46
10282.6	1405.22	34.85
10282.6	1405.22	40.63
10282.6	1405.22	40.05
10282.6	1405.22	27.52
10282.6	1405.22	39.05
10282.7	1405.23	35.74
10282.7	1405.23	32.83
10282.7	1405.23	31.09
10282.7	1405.23	25.19
10282.7	1405.23	18.12
10282.7	1405.23	25.62
10282.7	1405.23	24.25
10282.8	1405.23	21.21
10282.8	1405.23	21.81
10282.8	1405.23	19.94
10282.8	1405.24	17.79
10282.8	1405.24	14.99
10282.8	1405.24	14.81
10282.8	1405.24	19.2
10282.9	1405.24	23.59
10282.9	1405.24	17.94
10282.9	1405.24	22.31
10282.9	1405.24	29.17
10282.9	1405.24	23.26
10282.9	1405.24	29.06
10282.9	1405.25	23.02
10283	1405.25	23.89
10283	1405.25	19.66
10283	1405.25	22.61
10283	1405.25	19.3
10283	1405.25	20.94
10283	1405.25	22.98
10283	1405.25	23.84
10283.1	1405.25	24.3
10283.1	1405.26	21.89
10283.1	1405.26	17.28
10283.1	1405.26	24.15
10283.1	1405.26	20.58
10283.1	1405.26	22.36
10283.1	1405.26	27.9
10283.2	1405.26	22.51
10283.2	1405.26	27.81
10283.2	1405.26	26.33
10283.2	1405.26	25.76
10283.2	1405.27	23.62
10283.2	1405.27	24.09
10283.2	1405.27	26.65
10283.3	1405.27	31.03
10283.3	1405.27	26.3
10283.3	1405.27	25.72
10283.3	1405.27	20.44
10283.3	1405.27	21.7
10283.3	1405.27	24.13
10283.3	1405.27	26.56
10283.4	1405.28	21.69
10283.4	1405.28	24.12
10283.4	1405.28	28.37
10283.4	1405.28	27.53
10283.4	1405.28	31.78
10283.4	1405.28	25.35
10283.4	1405.28	35.05
10283.5	1405.28	34.34
10283.5	1405.28	31.56
10283.5	1405.28	32.03
10283.5	1405.29	33.29
10283.5	1405.29	30.64
10283.5	1405.29	31.1
10283.5	1405.29	28.7
10283.6	1405.29	31.77
10283.6	1405.29	30.3
10283.6	1405.29	24.77
10283.6	1405.29	30.84
10283.6	1405.29	27.28
10283.6	1405.29	32.55
10283.6	1405.3	36.14
10283.7	1405.3	33.49
10283.7	1405.3	27.32
10283.7	1405.3	31.31
10283.7	1405.3	39.58
10283.7	1405.3	36.66
10283.7	1405.3	36.09
10283.7	1405.3	30.72
10283.8	1405.3	32.35
10283.8	1405.3	29.04
10283.8	1405.31	32.76
10283.8	1405.31	31.02
10283.8	1405.31	29.53
10283.8	1405.31	26.62
10283.8	1405.31	26.19
10283.9	1405.31	20.53
10283.9	1405.31	24.91
10283.9	1405.31	21.35
10283.9	1405.31	23.89
10283.9	1405.31	18.09
10283.9	1405.32	21.83
10283.9	1405.32	26.21
10284	1405.32	30.85
10284	1405.32	27.29
10284	1405.32	24.75
10284	1405.32	28.09
10284	1405.32	33.37
10284	1405.32	28.76
10284	1405.32	29.61
10284.1	1405.32	26.83
10284.1	1405.33	31.34
10284.1	1405.33	23.21
10284.1	1405.33	20.95
10284.1	1405.33	22.21
10284.1	1405.33	19.28
10284.1	1405.33	19.75
10284.2	1405.33	22.57
10284.2	1405.33	23.16
10284.2	1405.33	25.18
10284.2	1405.33	28.39
10284.2	1405.34	33.93
10284.2	1405.34	33.5
10284.2	1405.34	36.57
10284.3	1405.34	31.83
10284.3	1405.34	34.12
10284.3	1405.34	34.47
10284.3	1405.34	25.19
10284.3	1405.34	23.97
10284.3	1405.34	25.47
10284.3	1405.34	21.91
10284.4	1405.35	25.9
10284.4	1405.35	22.59
10284.4	1405.35	22.54
10284.4	1405.35	22.23
10284.4	1405.35	30.11
10284.4	1405.35	30.71
10284.4	1405.35	26.5
10284.5	1405.35	32.94
10284.5	1405.35	34.05
10284.5	1405.35	36.47
10284.5	1405.36	37.2
10284.5	1405.36	40.27
10284.5	1405.36	38.41
10284.5	1405.36	34.58
10284.6	1405.36	37.78
10284.6	1405.36	36.05
10284.6	1405.36	35.6
10284.6	1405.36	36.33
10284.6	1405.36	35.38
10284.6	1405.36	37.26
10284.6	1405.37	49.4
10284.7	1405.37	36.13
10284.7	1405.37	38.92
10284.7	1405.37	38.88
10284.7	1405.37	36.5
10284.7	1405.37	37.47
10284.7	1405.37	43.65
10284.7	1405.37	46.58
10284.8	1405.37	46.39
10284.8	1405.37	52.56
10284.8	1405.38	46.17
10284.8	1405.38	46.51
10284.8	1405.38	44.14
10284.8	1405.38	51.07
10284.8	1405.38	51.39
10284.9	1405.38	52.51
10284.9	1405.38	48.19
10284.9	1405.38	46.32
10284.9	1405.38	47.96
10284.9	1405.38	49.46
10284.9	1405.38	47.09
10284.9	1405.39	44.58
10285	1405.39	52.03
10285	1405.39	53.4
10285	1405.39	51.16
10285	1405.39	52
10285	1405.39	62.66
10285	1405.39	56.29
10285	1405.39	58.44
10285.1	1405.39	61.6
10285.1	1405.39	57.41
10285.1	1405.4	57.88
10285.1	1405.4	57.97
10285.1	1405.4	50.04
10285.1	1405.4	53.48
10285.1	1405.4	42.93
10285.2	1405.4	43.67
10285.2	1405.4	39.47
10285.2	1405.4	31.89
10285.2	1405.4	34.29
10285.2	1405.4	37.49
10285.2	1405.41	26.8
10285.2	1405.41	31.8
10285.3	1405.41	26.95
10285.3	1405.41	25.6
10285.3	1405.41	21.91
10285.3	1405.41	23.43
10285.3	1405.41	26.1
10285.3	1405.41	27.08
10285.3	1405.41	26.64
10285.4	1405.41	23.6
10285.4	1405.42	29.39
10285.4	1405.42	25.04
10285.4	1405.42	21.21
10285.4	1405.42	19.08
10285.4	1405.42	22.16
10285.4	1405.42	24.05
10285.5	1405.42	25.42
10285.5	1405.42	26.91
10285.5	1405.42	28.43
10285.5	1405.42	29.42
10285.5	1405.43	22.86
10285.5	1405.43	27.61
10285.5	1405.43	24.57
10285.6	1405.43	23.04
10285.6	1405.43	24.19
10285.6	1405.43	19.46
10285.6	1405.43	20.05
10285.6	1405.43	19.6
10285.6	1405.43	20.19
10285.6	1405.43	17.15
10285.7	1405.44	23.22
10285.7	1405.44	20.03
10285.7	1405.44	17.77
10285.7	1405.44	19.81
10285.7	1405.44	18.98
10285.7	1405.44	27.78
10285.7	1405.44	26.29
10285.8	1405.44	31.29
10285.8	1405.44	32.92
10285.8	1405.44	24.95
10285.8	1405.45	29.06
10285.8	1405.45	40.41
10285.8	1405.45	36.73
10285.8	1405.45	37.98
10285.9	1405.45	29.26
10285.9	1405.45	28.1
10285.9	1405.45	31.16
10285.9	1405.45	26.29
10285.9	1405.45	24.8
10285.9	1405.45	21.88
10285.9	1405.46	26.76
10286	1405.46	21.5
10286	1405.46	22.22
10286	1405.46	22.02
10286	1405.46	17.67
10286	1405.46	23.85
10286	1405.46	22.12
10286	1405.46	21.55
10286.1	1405.46	22.4
10286.1	1405.46	22.73
10286.1	1405.47	21.89
10286.1	1405.47	20.28
10286.1	1405.47	19.19
10286.1	1405.47	17.7
10286.1	1405.47	24.53
10286.2	1405.47	17.84
10286.2	1405.47	24.93
10286.2	1405.47	22.54
10286.2	1405.47	25.22
10286.2	1405.47	25.81
10286.2	1405.48	24.99
10286.2	1405.48	29.1
10286.3	1405.48	30.07
10286.3	1405.48	34.94
10286.3	1405.48	25.29
10286.3	1405.48	34.98
10286.3	1405.48	31.81
10286.3	1405.48	37.32
10286.3	1405.48	33.5
10286.4	1405.48	33.84
10286.4	1405.49	37.68
10286.4	1405.49	30.49
10286.4	1405.49	29.78
10286.4	1405.49	22.52
10286.4	1405.49	22.09
10286.4	1405.49	18.78
10286.5	1405.49	21.87
10286.5	1405.49	22.26
10286.5	1405.49	28.12
10286.5	1405.49	26.53
10286.5	1405.5	21.42
10286.5	1405.5	29.42
10286.5	1405.5
10286.6	1405.5
10286.6	1405.5
10286.6	1405.5
10286.6	1405.5
10286.6	1405.5
10286.6	1405.5
10286.6	1405.51	29.74
10286.7	1405.51	33.83
10286.7	1405.51	33.38
10286.7	1405.51	36.32
10286.7	1405.51	36.4
10286.7	1405.51	33.88
10286.7	1405.51	36.4
10286.7	1405.51	37.38
10286.8	1405.51	36.41
10286.8	1405.51	40.89
10286.8	1405.52	37.47
10286.8	1405.52	31.21
10286.8	1405.52	28.29
10286.8	1405.52	28.47
10286.8	1405.52	28.01
10286.9	1405.52	19.5
10286.9	1405.52	21.52
10286.9	1405.52	22.89
10286.9	1405.52	22.94
10286.9	1405.52	18.46
10286.9	1405.53	20.23
10286.9	1405.53	20.56
10287	1405.53	19.2
10287	1405.53	20.64
10287	1405.53	23.33
10287	1405.53	20.81
10287	1405.53	20.63
10287	1405.53	21.49
10287	1405.53	18.7
10287.1	1405.53	23.19
10287.1	1405.54	20.38
10287.1	1405.54	30.56
10287.1	1405.54	20.25
10287.1	1405.54	19.16
10287.1	1405.54	17.54
10287.1	1405.54	18.37
10287.2	1405.54	16.36
10287.2	1405.54	21.24
10287.2	1405.54	23.39
10287.2	1405.54	23.84
10287.2	1405.55	20.55
10287.2	1405.55	21.93
10287.2	1405.55	24.73
10287.3	1405.55	23.5
10287.3	1405.55	24.22
10287.3	1405.55	21.43
10287.3	1405.55	23.06
10287.3	1405.55	25.2
10287.3	1405.55	21.5
10287.3	1405.55	17.67
10287.4	1405.56	18.78
10287.4	1405.56	15.73
10287.4	1405.56	23.08
10287.4	1405.56	25.09
10287.4	1405.56	17.37
10287.4	1405.56	17.43
10287.4	1405.56	15.81
10287.5	1405.56	18.35
10287.5	1405.56	20.37
10287.5	1405.56	19.01
10287.5	1405.57	23.36
10287.5	1405.57	24.23
10287.5	1405.57	19.24
10287.5	1405.57	21.39
10287.6	1405.57	22.5
10287.6	1405.57	24.65
10287.6	1405.57	24.97
10287.6	1405.57	25.95
10287.6	1405.57	33.02
10287.6	1405.57	28.55
10287.6	1405.58	29.67
10287.7	1405.58	28.33
10287.7	1405.58	31.25
10287.7	1405.58	32.36
10287.7	1405.58	33.61
10287.7	1405.58	33.82
10287.7	1405.58	36.48
10287.7	1405.58	37.58
10287.8	1405.58	34.54
10287.8	1405.58	41.47
10287.8	1405.59	43.6
10287.8	1405.59	39.79
10287.8	1405.59	45.93
10287.8	1405.59	39.41
10287.8	1405.59	35.47
10287.9	1405.59	47.96
10287.9	1405.59	37.06
10287.9	1405.59	36.87
10287.9	1405.59	34.99
10287.9	1405.59	33.25
10287.9	1405.6	40.05
10287.9	1405.6	33.9
10288	1405.6	26.2
10288	1405.6	33.54
10288	1405.6	32.96
10288	1405.6	26.68
10288	1405.6	28.18
10288	1405.6	32.66
10288	1405.6	27.82
10288.1	1405.6	25.57
10288.1	1405.61	26.41
10288.1	1405.61	23.1
10288.1	1405.61	18.76
10288.1	1405.61	23.64
10288.1	1405.61	20.72
10288.1	1405.61	18.58
10288.2	1405.61	11.76
10288.2	1405.61	20.66
10288.2	1405.61	16.45
10288.2	1405.61	13.15
10288.2	1405.62	11.15
10288.2	1405.62	16.32
10288.2	1405.62	10.74
10288.3	1405.62	11.72
10288.3	1405.62	6.6
10288.3	1405.62	9.94
10288.3	1405.62	6.23
10288.3	1405.62	11.76
10288.3	1405.62	10.66
10288.3	1405.62	11.77
10288.4	1405.62	11.06
10288.4	1405.63	12.43
10288.4	1405.63	15.23
10288.4	1405.63	7.62
10288.4	1405.63	13.56
10288.4	1405.63	12.47
10288.4	1405.63	10.85
10288.5	1405.63	9.88
10288.5	1405.63	6.57
10288.5	1405.63	10.28
10288.5	1405.63	12.04
10288.5	1405.64	16.14
10288.5	1405.64	18.93
10288.5	1405.64	12.5
10288.6	1405.64	16.86
10288.6	1405.64	13.29
10288.6	1405.64	12.84
10288.6	1405.64	14.6
10288.6	1405.64	21.31
10288.6	1405.64	15.29
10288.6	1405.64	10.68
10288.7	1405.65	7.75
10288.7	1405.65	9.77
10288.7	1405.65	12.18
10288.7	1405.65	10.3
10288.7	1405.65	13.88
10288.7	1405.65	7.71
10288.7	1405.65	9.6
10288.8	1405.65	11.88
10288.8	1405.65	8.04
10288.8	1405.65	13.18
10288.8	1405.66	16.24
10288.8	1405.66	7.99
10288.8	1405.66	8.98
10288.8	1405.66	8.29
10288.9	1405.66	6.86
10288.9	1405.66	11.92
10288.9	1405.66	12.47
10288.9	1405.66	15.81
10288.9	1405.66	18.22
10288.9	1405.66	24.9
10288.9	1405.67	25.62
10289	1405.67	25.17
10289	1405.67	29.25
10289	1405.67	27.51
10289	1405.67	21.99
10289	1405.67	20.48
10289	1405.67	15.49
10289	1405.67	21.27
10289.1	1405.67	19.39
10289.1	1405.67	21.15
10289.1	1405.68	16.67
10289.1	1405.68	25.17
10289.1	1405.68	25.76
10289.1	1405.68	25.96
10289.1	1405.68	25.89
10289.2	1405.68	28.68
10289.2	1405.68	25.64
10289.2	1405.68	27.01
10289.2	1405.68	22.15
10289.2	1405.68	22.33
10289.2	1405.69	24.61
10289.2	1405.69	15.35
10289.3	1405.69	11.52
10289.3	1405.69	11.27
10289.3	1405.69	12.67
10289.3	1405.69	15.33
10289.3	1405.69	16.44
10289.3	1405.69	9.62
10289.3	1405.69	15.15
10289.4	1405.69	12.62
10289.4	1405.7	10.09
10289.4	1405.7	14.32
10289.4	1405.7	9.84
10289.4	1405.7	12.5
10289.4	1405.7	14.39
10289.4	1405.7
10289.5	1405.7
10289.5	1405.7
10289.5	1405.7
10289.5	1405.7
10289.5	1405.71
10289.5	1405.71
10289.5	1405.71
10289.6	1405.71
10289.6	1405.71
10289.6	1405.71
10289.6	1405.71	6.8
10289.6	1405.71	6.1
10289.6	1405.71	10.35
10289.6	1405.71	5.34
10289.7	1405.72	14.25
10289.7	1405.72	6
10289.7	1405.72	10.62
10289.7	1405.72	9.39
10289.7	1405.72
10289.7	1405.72	9.63
10289.7	1405.72	2.72
10289.8	1405.72	8.91
10289.8	1405.72	11.32
10289.8	1405.72	10.22
10289.8	1405.73	14.32
10289.8	1405.73
10289.8	1405.73
10289.8	1405.73	11.44
10289.9	1405.73	15.01
10289.9	1405.73	16.64
10289.9	1405.73	15.8
10289.9	1405.73	17.96
10289.9	1405.73	18.94
10289.9	1405.73	15.13
10289.9	1405.74	16.75
10290	1405.74	27.19
10290	1405.74	24.93
10290	1405.74	31.33
10290	1405.74	31.29
10290	1405.74	38.09
10290	1405.74	36.87
10290	1405.74	33.96
10290.1	1405.74	33.38
10290.1	1405.74	38.75
10290.1	1405.75	36.37
10290.1	1405.75	35.8
10290.1	1405.75	29.94
10290.1	1405.75	28.33
10290.1	1405.75	28.78
10290.2	1405.75	26.13
10290.2	1405.75	26.98
10290.2	1405.75	21.87
10290.2	1405.75	19.34
10290.2	1405.76	19.56
10290.2	1405.76	21.45
10290.2	1405.76	20.21
10290.3	1405.76	13.91
10290.3	1405.76	14.88
10290.3	1405.76	15.99
10290.3	1405.76	12.69
10290.3	1405.76	15.24
10290.3	1405.76	10.52
10290.3	1405.76	19.15
10290.4	1405.77	14.16
10290.4	1405.77	17.6
10290.4	1405.77	9.49
10290.4	1405.77	15.4
10290.4	1405.77	16.02
10290.4	1405.77	11.89
10290.4	1405.77	11.85
10290.5	1405.77	12.82
10290.5	1405.77	7.96
10290.5	1405.77	10.1
10290.5	1405.78	10.56
10290.5	1405.78	8.03
10290.5	1405.78	8.38
10290.5	1405.78	15.58
10290.6	1405.78	13.82
10290.6	1405.78	11.83
10290.6	1405.78	15.03
10290.6	1405.78	10.68
10290.6	1405.78	12.31
10290.6	1405.78	16.79
10290.6	1405.79	21.52
10290.7	1405.79	17.19
10290.7	1405.79	17.9
10290.7	1405.79	16.44
10290.7	1405.79	26.94
10290.7	1405.79	27
10290.7	1405.79	24.2
10290.7	1405.79	29.46
10290.8	1405.79
10290.8	1405.79
10290.8	1405.8
10290.8	1405.8
10290.8	1405.8
10290.8	1405.8
10290.8	1405.8
10290.9	1405.8
10290.9	1405.8
10290.9	1405.8
10290.9	1405.8
10290.9	1405.8
10290.9	1405.81
10290.9	1405.81
10291	1405.81
10291	1405.81
10291	1405.81
10291	1405.81	15.36
10291	1405.81	17.38
10291	1405.81	16.43
10291	1405.81	11.81
10291.1	1405.81	8.89
10291.1	1405.82	8.95
10291.1	1405.82	7.92
10291.1	1405.82	11.04
10291.1	1405.82	7.58
10291.1	1405.82	10.79
10291.1	1405.82	12.27
10291.2	1405.82	7.9
10291.2	1405.82	10.56
10291.2	1405.82	9.72
10291.2	1405.82	10.4
10291.2	1405.83	14.85
10291.2	1405.83	10.03
10291.2	1405.83	13.24
10291.3	1405.83	12.03
10291.3	1405.83	12.9
10291.3	1405.83	14.48
10291.3	1405.83	14.72
10291.3	1405.83	17.74
10291.3	1405.83	17.25
10291.3	1405.83	16.14
10291.4	1405.84	19.16
10291.4	1405.84	17.24
10291.4	1405.84	19.99
10291.4	1405.84	19.32
10291.4	1405.84	18.66
10291.4	1405.84	19.34
10291.4	1405.84	18.68
10291.5	1405.84	18.55
10291.5	1405.84	12.76
10291.5	1405.84	17.12
10291.5	1405.85	15.72
10291.5	1405.85	15.42
10291.5	1405.85	13.31
10291.5	1405.85	13.55
10291.6	1405.85	7.84
10291.6	1405.85	11.86
10291.6	1405.85	10.72
10291.6	1405.85	11.09
10291.6	1405.85	6.64
10291.6	1405.85	6.43
10291.6	1405.86	7.29
10291.7	1405.86	1.66
10291.7	1405.86	4.7
10291.7	1405.86	4.66
10291.7	1405.86	5.8
10291.7	1405.86	3.4
10291.7	1405.86	1.73
10291.7	1405.86	6.29
10291.8	1405.86	6.08
10291.8	1405.86	3.41
10291.8	1405.87	5.89
10291.8	1405.87	8.92
10291.8	1405.87	9.32
10291.8	1405.87	9.81
10291.8	1405.87	9.51
10291.9	1405.87	6.93
10291.9	1405.87	7.25
10291.9	1405.87	10.26
10291.9	1405.87	8.41
10291.9	1405.87	10.18
10291.9	1405.88	9.68
10291.9	1405.88	14.58
10292	1405.88	14.19
10292	1405.88	13.07
10292	1405.88	12.03
10292	1405.88	13.24
10292	1405.88	16.09
10292	1405.88	18.48
10292	1405.88	17.26
10292.1	1405.88	18.02
10292.1	1405.88	20.23
10292.1	1405.89	25.86
10292.1	1405.89	25.54
10292.1	1405.89	28.54
10292.1	1405.89	32.71
10292.1	1405.89	32.66
10292.2	1405.89	35.84
10292.2	1405.89	39.02
10292.2	1405.89	36.93
10292.2	1405.89	35.37
10292.2	1405.89	32.73
10292.2	1405.9	35.37
10292.2	1405.9	36.75
10292.3	1405.9	35.72
10292.3	1405.9	34.25
10292.3	1405.9	35.2
10292.3	1405.9	32.29
10292.3	1405.9	34.92
10292.3	1405.9	36.5
10292.3	1405.9	28.84
10292.4	1405.9	28.88
10292.4	1405.91	31.09
10292.4	1405.91	28.18
10292.4	1405.91	32.44
10292.4	1405.91	30.42
10292.4	1405.91	28.59
10292.4	1405.91	25.77
10292.5	1405.91	24.2
10292.5	1405.91	26.75
10292.5	1405.91	24.65
10292.5	1405.91	15.27
10292.5	1405.92	10.35
10292.5	1405.92	8.23
10292.5	1405.92	1.05
10292.6	1405.92	5.33
10292.6	1405.92	8.71
10292.6	1405.92	9.12
10292.6	1405.92	8.44
10292.6	1405.92	11.18
10292.6	1405.92	10.14
10292.6	1405.92	8.73
10292.7	1405.93	10.93
10292.7	1405.93	16.02
10292.7	1405.93	16.95
10292.7	1405.93	14.65
10292.7	1405.93	22.06
10292.7	1405.93	24.25
10292.7	1405.93	21.23
10292.8	1405.93	19.48
10292.8	1405.93	21.12
10292.8	1405.93	20.79
10292.8	1405.94	22.45
10292.8	1405.94	25.18
10292.8	1405.94	24.6
10292.8	1405.94	15.92
10292.9	1405.94	21.62
10292.9	1405.94	19.6
10292.9	1405.94	17.75
10292.9	1405.94	16.26
10292.9	1405.94	18.1
10292.9	1405.94	17.24
10292.9	1405.95	12.78
10293	1405.95	18.4
10293	1405.95	17.35
10293	1405.95	11.63
10293	1405.95	8.78
10293	1405.95	8.45
10293	1405.95	12.64
10293	1405.95	11.05
10293.1	1405.95	12.16
10293.1	1405.95	10.94
10293.1	1405.96	14.23
10293.1	1405.96	14.08
10293.1	1405.96	19.78
10293.1	1405.96	14.7
10293.1	1405.96	6.35
10293.2	1405.96	11.54
10293.2	1405.96	8.13
10293.2	1405.96	8.54
10293.2	1405.96	5.87
10293.2	1405.96	5.17
10293.2	1405.97	8.01
10293.2	1405.97	10.13
10293.3	1405.97	9.8
10293.3	1405.97	4.77
10293.3	1405.97	8.78
10293.3	1405.97	10.81
10293.3	1405.97	4.33
10293.3	1405.97	10.43
10293.3	1405.97	12.18
10293.4	1405.97	10.04
10293.4	1405.98	7.72
10293.4	1405.98	8.4
10293.4	1405.98	8.53
10293.4	1405.98	10.83
10293.4	1405.98	9.15
10293.4	1405.98	12.44
10293.5	1405.98	9.96
10293.5	1405.98	13.06
10293.5	1405.98	14.37
10293.5	1405.98	16.74
10293.5	1405.99	15.7
10293.5	1405.99	16.74
10293.5	1405.99	20.83
10293.6	1405.99	19.78
10293.6	1405.99	22.34
10293.6	1405.99	24.72
10293.6	1405.99	23.41
10293.6	1405.99	18.69
10293.6	1405.99	23.94
10293.6	1405.99	22.91
10293.7	1406	22.5
10293.7	1406	21.37
10293.7	1406	22.49
10293.7	1406	21.45
10293.7	1406	15.54
10293.7	1406	17.11
10293.7	1406	17.42
10293.8	1406	13.48
10293.8	1406	21.45
10293.8	1406.01	19.51
10293.8	1406.01	17.84
10293.8	1406.01	17.79
10293.8	1406.01	18.37
10293.8	1406.01	20.04
10293.9	1406.01	24.66
10293.9	1406.01	29.46
10293.9	1406.01	31.82
10293.9	1406.01	28.37
10293.9	1406.01	34.06
10293.9	1406.02	35.89
10293.9	1406.02	34.5
10294	1406.02	33.09
10294	1406.02	34.84
10294	1406.02	35.32
10294	1406.02	33.02
10294	1406.02	29.39
10294	1406.02	29.52
10294	1406.02	26.86
10294.1	1406.02	26.01
10294.1	1406.03	25.15
10294.1	1406.03	24.83
10294.1	1406.03	28.27
10294.1	1406.03	25.53
10294.1	1406.03	27.81
10294.1	1406.03	23.89
10294.2	1406.03	21.68
10294.2	1406.03	24.15
10294.2	1406.03	21.31
10294.2	1406.03	21.73
10294.2	1406.04	22.49
10294.2	1406.04	21.36
10294.2	1406.04	19.33
10294.3	1406.04	15.75
10294.3	1406.04	18.23
10294.3	1406.04	14.03
10294.3	1406.04	14.96
10294.3	1406.04	17.07
10294.3	1406.04	16.67
10294.3	1406.04	12.47
10294.4	1406.05	14.94
10294.4	1406.05	16.16
10294.4	1406.05	14.85
10294.4	1406.05	14.44
10294.4	1406.05	14.93
10294.4	1406.05	12.79
10294.4	1406.05	12.11
10294.5	1406.05	15.94
10294.5	1406.05	15.08
10294.5	1406.05	14.94
10294.5	1406.06	12.08
10294.5	1406.06	14.74
10294.5	1406.06	16.49
10294.5	1406.06	15.72
10294.6	1406.06	15.49
10294.6	1406.06	20.39
10294.6	1406.06	20.52
10294.6	1406.06	23.53
10294.6	1406.06	24.56
10294.6	1406.06	27.75
10294.6	1406.07	26.87
10294.7	1406.07	26.19
10294.7	1406.07	28.93
10294.7	1406.07	27.81
10294.7	1406.07	26.86
10294.7	1406.07	30.66
10294.7	1406.07	28.28
10294.7	1406.07	27.51
10294.8	1406.07	26.92
10294.8	1406.07	26.52
10294.8	1406.08	27.29
10294.8	1406.08	28.14
10294.8	1406.08	30.78
10294.8	1406.08	26.32
10294.8	1406.08	24.83
10294.9	1406.08	26.94
10294.9	1406.08	25.89
10294.9	1406.08	22.96
10294.9	1406.08	20.21
10294.9	1406.08	24.38
10294.9	1406.09	25.59
10294.9	1406.09	25.18
10295	1406.09	27.54
10295	1406.09	29.11
10295	1406.09	25.75
10295	1406.09	26.06
10295	1406.09	25.55
10295	1406.09	20.91
10295	1406.09	18.61
10295.1	1406.09	21.98
10295.1	1406.1	14.9
10295.1	1406.1	19.36
10295.1	1406.1	20.04
10295.1	1406.1	20.08
10295.1	1406.1	18.68
10295.1	1406.1	19.44
10295.2	1406.1	21.47
10295.2	1406.1	21.34
10295.2	1406.1	21.11
10295.2	1406.1	21.06
10295.2	1406.11	23.25
10295.2	1406.11	21.67
10295.2	1406.11	26.04
10295.3	1406.11	21.94
10295.3	1406.11	22.61
10295.3	1406.11	23.11
10295.3	1406.11	23.33
10295.3	1406.11	20.95
10295.3	1406.11	18.74
10295.3	1406.11	21.3
10295.4	1406.12	18.38
10295.4	1406.12	16.71
10295.4	1406.12	15.85
10295.4	1406.12	14.45
10295.4	1406.12	16.47
10295.4	1406.12	17.6
10295.4	1406.12	13.21
10295.5	1406.12	13.35
10295.5	1406.12	17.99
10295.5	1406.12	15.6
10295.5	1406.12	15.36
10295.5	1406.13	16.58
10295.5	1406.13	16.43
10295.5	1406.13	14.39
10295.6	1406.13	15.08
10295.6	1406.13	17.65
10295.6	1406.13	12.99
10295.6	1406.13	13.94
10295.6	1406.13	13.08
10295.6	1406.13	12.94
10295.6	1406.13	8.62
10295.7	1406.14	17.61
10295.7	1406.14	13.24
10295.7	1406.14	10.75
10295.7	1406.14	14.57
10295.7	1406.14	11.72
10295.7	1406.14	11.76
10295.7	1406.14	16.68
10295.8	1406.14	16.9
10295.8	1406.14	14.24
10295.8	1406.14	13.19
10295.8	1406.15	18.02
10295.8	1406.15	17.43
10295.8	1406.15	16.03
10295.8	1406.15	19.86
10295.9	1406.15	16.02
10295.9	1406.15	14.89
10295.9	1406.15	13.57
10295.9	1406.15	17.13
10295.9	1406.15	13.56
10295.9	1406.15	13.79
10295.9	1406.16	16.88
10296	1406.16	14.4
10296	1406.16	14.63
10296	1406.16	16.84
10296	1406.16	19.23
10296	1406.16	21.61
10296	1406.16	26.07
10296	1406.16	26.02
10296.1	1406.16	24.96
10296.1	1406.16	25.19
10296.1	1406.17	25.19
10296.1	1406.17	29.11
10296.1	1406.17	27.98
10296.1	1406.17	27.75
10296.1	1406.17	30.59
10296.2	1406.17	24.34
10296.2	1406.17	25.91
10296.2	1406.17	25.87
10296.2	1406.17	20.52
10296.2	1406.17	18.76
10296.2	1406.18	20.77
10296.2	1406.18	17.93
10296.3	1406.18	18.69
10296.3	1406.18	16.47
10296.3	1406.18	12.09
10296.3	1406.18	12.94
10296.3	1406.18	11.45
10296.3	1406.18	11.94
10296.3	1406.18	10.63
10296.4	1406.18	16.99
10296.4	1406.19	16.13
10296.4	1406.19	14.82
10296.4	1406.19	16.94
10296.4	1406.19	18.59
10296.4	1406.19	18.45
10296.4	1406.19	19.5
10296.5	1406.19	19.99
10296.5	1406.19	16.95
10296.5	1406.19	15.09
10296.5	1406.19	16.13
10296.5	1406.2	13.55
10296.5	1406.2	9.52
10296.5	1406.2	11.91
10296.6	1406.2	8.51
10296.6	1406.2	11.99
10296.6	1406.2	10.95
10296.6	1406.2	10.27
10296.6	1406.2	5.96
10296.6	1406.2	11.52
10296.6	1406.2	17.8
10296.7	1406.21	14.76
10296.7	1406.21	15.52
10296.7	1406.21	14.66
10296.7	1406.21	17.41
10296.7	1406.21	17.27
10296.7	1406.21	17.4
10296.7	1406.21	19.08
10296.8	1406.21	17.95
10296.8	1406.21	9.12
10296.8	1406.21	16.39
10296.8	1406.22	15.35
10296.8	1406.22	14.76
10296.8	1406.22	18.68
10296.8	1406.22	18.54
10296.9	1406.22	17.86
10296.9	1406.22	21.96
10296.9	1406.22	30.92
10296.9	1406.22	28.71
10296.9	1406.22	38.19
10296.9	1406.22	35
10296.9	1406.23	33.24
10297	1406.23	29.33
10297	1406.23	32.25
10297	1406.23	31.12
10297	1406.23	26.5
10297	1406.23	28.43
10297	1406.23	25.03
10297	1406.23	22.01
10297.1	1406.23	21.87
10297.1	1406.23	21.37
10297.1	1406.24	21.59
10297.1	1406.24	15.67
10297.1	1406.24	15.36
10297.1	1406.24	12.51
10297.1	1406.24	12.54
10297.2	1406.24	13.3
10297.2	1406.24	14.61
10297.2	1406.24	11.76
10297.2	1406.24	11.44
10297.2	1406.24	13.2
10297.2	1406.25	12.79
10297.2	1406.25	14.18
10297.3	1406.25	14.42
10297.3	1406.25	12.74
10297.3	1406.25	14.58
10297.3	1406.25	15.16
10297.3	1406.25	14.4
10297.3	1406.25	11.28
10297.3	1406.25	14.2
10297.4	1406.26	15.78
10297.4	1406.26	13.74
10297.4	1406.26	12.33
10297.4	1406.26	12.92
10297.4	1406.26	13.14
10297.4	1406.26	10.83
10297.4	1406.26	15.03
10297.5	1406.26	14.17
10297.5	1406.26	15.66
10297.5	1406.26	18.95
10297.5	1406.27	23.22
10297.5	1406.27	14.88
10297.5	1406.27	16.54
10297.5	1406.27	18.95
10297.6	1406.27	18.63
10297.6	1406.27	17.75
10297.6	1406.27	20.41
10297.6	1406.27	20.65
10297.6	1406.27	21.5
10297.6	1406.27	23.62
10297.6	1406.28	21.22
10297.7	1406.28	17.47
10297.7	1406.28	18.88
10297.7	1406.28	18.47
10297.7	1406.28	18.86
10297.7	1406.28	17.27
10297.7	1406.28	14.24
10297.7	1406.28	10.75
10297.8	1406.28	18.3
10297.8	1406.28	13.91
10297.8	1406.29	9.17
10297.8	1406.29	13.56
10297.8	1406.29	12.14
10297.8	1406.29	12.54
10297.8	1406.29	14.95
10297.9	1406.29	17.88
10297.9	1406.29	19.17
10297.9	1406.29	19.85
10297.9	1406.29	19.62
10297.9	1406.29	23.63
10297.9	1406.3	18.62
10297.9	1406.3	20.82
10298	1406.3	30.96
10298	1406.3	29.74
10298	1406.3	21.68
10298	1406.3	21.91
10298	1406.3	17.42
10298	1406.3	19.99
10298	1406.3	18.4
10298.1	1406.3	19.35
10298.1	1406.31	17.76
10298.1	1406.31	17.26
10298.1	1406.31	17.04
10298.1	1406.31	13.38
10298.1	1406.31	17.31
10298.1	1406.31	17.98
10298.2	1406.31	14.86
10298.2	1406.31	18.06
10298.2	1406.31	19.82
10298.2	1406.31	17.42
10298.2	1406.32	18.1
10298.2	1406.32	20.58
10298.2	1406.32	21.51
10298.3	1406.32	20.74
10298.3	1406.32	24.49
10298.3	1406.32	26.08
10298.3	1406.32	24.95
10298.3	1406.32	27.14
10298.3	1406.32	25.2
10298.3	1406.32	26.7
10298.4	1406.33	29.98
10298.4	1406.33	31.56
10298.4	1406.33	32.77
10298.4	1406.33	35.33
10298.4	1406.33	39.14
10298.4	1406.33	38.47
10298.4	1406.33	43.89
10298.5	1406.33	44.38
10298.5	1406.33	44.87
10298.5	1406.33	40.43
10298.5	1406.34	42.62
10298.5	1406.34	37.1
10298.5	1406.34	35.52
10298.5	1406.34	37.45
10298.6	1406.34	40.1
10298.6	1406.34	37.8
10298.6	1406.34	35.14
10298.6	1406.34	34.11
10298.6	1406.34	31.09
10298.6	1406.34	37.61
10298.6	1406.35	38.83
10298.7	1406.35	34.28
10298.7	1406.35	34.87
10298.7	1406.35	37.44
10298.7	1406.35	39.46
10298.7	1406.35	38.59
10298.7	1406.35	38
10298.7	1406.35	35.43
10298.8	1406.35	36.64
10298.8	1406.35	36.16
10298.8	1406.36	33.95
10298.8	1406.36	32.01
10298.8	1406.36	35.93
10298.8	1406.36	36.25
10298.8	1406.36	33.05
10298.9	1406.36	40.28
10298.9	1406.36	41.85
10298.9	1406.36	44.14
10298.9	1406.36	38.52
10298.9	1406.36	42.24
10298.9	1406.37	37.79
10298.9	1406.37	37.83
10299	1406.37	43.63
10299	1406.37	39.18
10299	1406.37	36.88
10299	1406.37	37.38
10299	1406.37	32.66
10299	1406.37	28
10299	1406.37	27.5
10299.1	1406.37	25.3
10299.1	1406.38	22.36
10299.1	1406.38	22.04
10299.1	1406.38	22.62
10299.1	1406.38	19.59
10299.1	1406.38	22.88
10299.1	1406.38	20.3
10299.2	1406.38	20.07
10299.2	1406.38	21.47
10299.2	1406.38	20.16
10299.2	1406.38	21.1
10299.2	1406.38	20.6
10299.2	1406.39	22.81
10299.2	1406.39	20.79
10299.3	1406.39	21.46
10299.3	1406.39	20.6
10299.3	1406.39	19.19
10299.3	1406.39	18.15
10299.3	1406.39	24.7
10299.3	1406.39	20.76
10299.3	1406.39	19.36
10299.4	1406.39	19.31
10299.4	1406.4	20.34
10299.4	1406.4	18.21
10299.4	1406.4	18.81
10299.4	1406.4	19.94
10299.4	1406.4	18.35
10299.4	1406.4	17.12
10299.5	1406.4	21.06
10299.5	1406.4	21.01
10299.5	1406.4	18.33
10299.5	1406.4	20
10299.5	1406.41	18.51
10299.5	1406.41	17.19
10299.5	1406.41	14.79
10299.6	1406.41	17.82
10299.6	1406.41	17.77
10299.6	1406.41	18.26
10299.6	1406.41	16.31
10299.6	1406.41	14.36
10299.6	1406.41	16.39
10299.6	1406.41	17.52
10299.7	1406.42	16.93
10299.7	1406.42	17.07
10299.7	1406.42	21.28
10299.7	1406.42	20.14
10299.7	1406.42	21.72
10299.7	1406.42	22.4
10299.7	1406.42	25.06
10299.8	1406.42	21.3
10299.8	1406.42	24.24
10299.8	1406.42	20.75
10299.8	1406.43	24.86
10299.8	1406.43	25.81
10299.8	1406.43	27.85
10299.8	1406.43	25
10299.9	1406.43	26.94
10299.9	1406.43	27.25
10299.9	1406.43	25.21
10299.9	1406.43	28.97
10299.9	1406.43	28.83
10299.9	1406.43	24.89
10299.9	1406.44	27
10300	1406.44	31.65
10300	1406.44	33.31
10300	1406.44	29.2
10300	1406.44	34.02
10300	1406.44	36.6
10300	1406.44	36.39
10300	1406.44	37.33
10300.1	1406.44	30.79
10300.1	1406.44	30.92
10300.1	1406.45	30.33
10300.1	1406.45	27.94
10300.1	1406.45	25.54
10300.1	1406.45	27.3
10300.1	1406.45	22.37
10300.1	1406.45	22.15
10300.2	1406.45	21.65
10300.2	1406.45	23.23
10300.2	1406.45	23.72
10300.2	1406.45	23.31
10300.2	1406.46	19.64
10300.2	1406.46	22.49
10300.2	1406.46	26.24
10300.3	1406.46	26.73
10300.3	1406.46	22.09
10300.3	1406.46	22.94
10300.3	1406.46	25.78
10300.3	1406.46	27.54
10300.3	1406.46	21.44
10300.3	1406.46	24.01
10300.4	1406.47	26.22
10300.4	1406.47	20.58
10300.4	1406.47	23.6
10300.4	1406.47	19.48
10300.4	1406.47	20.25
10300.4	1406.47	22.99
10300.4	1406.47	21.68
10300.4	1406.47	19.74
10300.5	1406.47	25.3
10300.5	1406.47	29.5
10300.5	1406.48	29.72
10300.5	1406.48	29.76
10300.5	1406.48	33.33
10300.5	1406.48	37.43
10300.5	1406.48	38.46
10300.6	1406.48	42.01
10300.6	1406.48	39.53
10300.6	1406.48	39.57
10300.6	1406.48	42.22
10300.6	1406.48	41.56
10300.6	1406.49	46.19
10300.6	1406.49	45.24
10300.7	1406.49	46.09
10300.7	1406.49	44.96
10300.7	1406.49	42.76
10300.7	1406.49	42.08
10300.7	1406.49	40.32
10300.7	1406.49	37.75
10300.7	1406.49	35.18
10300.7	1406.49	31.61
10300.8	1406.5	28.95
10300.8	1406.5	29.26
10300.8	1406.5	24.79
10300.8	1406.5	21.13
10300.8	1406.5	26.69
10300.8	1406.5	20.48
10300.8	1406.5	20.07
10300.9	1406.5	22.02
10300.9	1406.5	21.06
10300.9	1406.51	25.17
10300.9	1406.51	22.32
10300.9	1406.51	20.91
10300.9	1406.51	22.86
10300.9	1406.51	23.09
10301	1406.51	23.04
10301	1406.51	24.35
10301	1406.51	24.57
10301	1406.51	24.16
10301	1406.51	21.76
10301	1406.52	25.78
10301	1406.52	27.81
10301	1406.52	23.96
10301.1	1406.52	25.54
10301.1	1406.52	26.4
10301.1	1406.52	24.36
10301.1	1406.52	26.75
10301.1	1406.52	28.42
10301.1	1406.52	31.08
10301.1	1406.52	27.78
10301.2	1406.53	32.52
10301.2	1406.53	33.82
10301.2	1406.53	36.03
10301.2	1406.53	37.44
10301.2	1406.53	42.07
10301.2	1406.53	38.14
10301.2	1406.53	39.35
10301.3	1406.53	37.6
10301.3	1406.53	36.83
10301.3	1406.53	38.31
10301.3	1406.54	39.98
10301.3	1406.54	40.11
10301.3	1406.54	44.38
10301.3	1406.54	40.73
10301.3	1406.54	42.84
10301.4	1406.54	41.98
10301.4	1406.54	45.73
10301.4	1406.54	46.04
10301.4	1406.54	47.79
10301.4	1406.54	47.92
10301.4	1406.55	47.96
10301.4	1406.55	48.54
10301.5	1406.55	47.23
10301.5	1406.55	41.08
10301.5	1406.55	38.6
10301.5	1406.55	41.15
10301.5	1406.55	37.86
10301.5	1406.55	33.66
10301.5	1406.55	36.5
10301.6	1406.55	37.9
10301.6	1406.56	30.55
10301.6	1406.56	29.49
10301.6	1406.56	28.9
10301.6	1406.56	30.66
10301.6	1406.56	25
10301.6	1406.56	23.33
10301.6	1406.56	23.46
10301.7	1406.56	21.7
10301.7	1406.56	21.29
10301.7	1406.56	23.31
10301.7	1406.57
10301.7	1406.57
10301.7	1406.57
10301.7	1406.57
10301.8	1406.57
10301.8	1406.57
10301.8	1406.57
10301.8	1406.57	32.36
10301.8	1406.57	31.86
10301.8	1406.57	32.08
10301.8	1406.58	31.15
10301.9	1406.58	31.28
10301.9	1406.58	27.16
10301.9	1406.58	29.19
10301.9	1406.58	25.52
10301.9	1406.58	22.95
10301.9	1406.58	17.92
10301.9	1406.58	22.22
10301.9	1406.58	20.36
10302	1406.58	19.95
10302	1406.59	20.27
10302	1406.59	16.32
10302	1406.59	15.73
10302	1406.59	15.42
10302	1406.59	16.84
10302	1406.59	16.88
10302.1	1406.59	16.56
10302.1	1406.59	17.79
10302.1	1406.59	20.1
10302.1	1406.59	16.69
10302.1	1406.6	14.39
10302.1	1406.6	19.15
10302.1	1406.6	16.02
10302.1	1406.6	16.69
10302.2	1406.6	16.46
10302.2	1406.6	17.42
10302.2	1406.6	17.92
10302.2	1406.6	15.22
10302.2	1406.6	17.62
10302.2	1406.6	18.77
10302.2	1406.61	19.36
10302.3	1406.61	20.21
10302.3	1406.61	19.81
10302.3	1406.61	18.42
10302.3	1406.61	23.36
10302.3	1406.61	22.94
10302.3	1406.61	22.17
10302.3	1406.61	19.76
10302.4	1406.61	19.36
10302.4	1406.61	16.86
10302.4	1406.62	23.17
10302.4	1406.62	20.21
10302.4	1406.62	22.52
10302.4	1406.62	25.3
10302.4	1406.62	25.79
10302.4	1406.62	26.74
10302.5	1406.62	31.04
10302.5	1406.62	28.46
10302.5	1406.62	28.68
10302.5	1406.62	30.17
10302.5	1406.62	26.69
10302.5	1406.63	29.73
10302.5	1406.63	28.52
10302.6	1406.63	28.92
10302.6	1406.63	25.16
10302.6	1406.63	22.31
10302.6	1406.63	22.17
10302.6	1406.63	26.38
10302.6	1406.63	27.15
10302.6	1406.63	25.38
10302.7	1406.63	27.97
10302.7	1406.64	29.28
10302.7	1406.64	29.41
10302.7	1406.64	32.27
10302.7	1406.64	32.41
10302.7	1406.64	32.36
10302.7	1406.64	33.94
10302.7	1406.64	35.53
10302.8	1406.64	34.31
10302.8	1406.64	33.63
10302.8	1406.64	34.14
10302.8	1406.65	34.82
10302.8	1406.65	34.68
10302.8	1406.65	31.92
10302.8	1406.65	30.97
10302.9	1406.65	33
10302.9	1406.65	29.35
10302.9	1406.65	29.22
10302.9	1406.65	28.27
10302.9	1406.65	32.02
10302.9	1406.65	32.7
10302.9	1406.66	28.59
10303	1406.66	24.19
10303	1406.66	23.7
10303	1406.66	25.48
10303	1406.66	22.9
10303	1406.66	23.4
10303	1406.66	23.89
10303	1406.66	21.41
10303	1406.66	21.9
10303.1	1406.66	21.49
10303.1	1406.67	21.08
10303.1	1406.67	22.48
10303.1	1406.67	21.18
10303.1	1406.67	22.05
10303.1	1406.67	22.54
10303.1	1406.67	21.68
10303.2	1406.67	17.54
10303.2	1406.67	20.94
10303.2	1406.67	22.36
10303.2	1406.67	23.85
10303.2	1406.68	26.34
10303.2	1406.68	24.3
10303.2	1406.68	24.34
10303.3	1406.68	22.85
10303.3	1406.68	23.71
10303.3	1406.68	24.93
10303.3	1406.68	29.42
10303.3	1406.68	27.11
10303.3	1406.68	24.25
10303.3	1406.68	26.47
10303.3	1406.69	26.96
10303.4	1406.69	24.84
10303.4	1406.69	28.78
10303.4	1406.69	28.01
10303.4	1406.69	23.97
10303.4	1406.69	27.18
10303.4	1406.69	29.31
10303.4	1406.69	25.64
10303.5	1406.69	25.06
10303.5	1406.69	27.92
10303.5	1406.7	26.06
10303.5	1406.7	27.64
10303.5	1406.7	28.06
10303.5	1406.7	26.2
10303.5	1406.7	26.69
10303.6	1406.7	27.93
[truncated: 1,019,899+ more rows]
