# Supplementary material for: Magnitude, frequency and climate forcing of global volcanism during the last glacial period as seen in Greenland and Antarctic ice cores (60–9 ka)
Source: Copernicus journal article supplement (doi:10.5194/cp-18-485-2022), 2022-03-15
Supplement: Supplementary file 1 [file cp-18-485-2022-supplement.zip › Supplementary Fig. S1.odp]

## Slide: Slide160
Supplementary figures for Lin et al., Climate of the Past, 2021

## Slide: Slide140
Figure S1 (a)
Age (b2k)

## Slide: Slide26
Figure S1 (b)


12000
12200
12400
12600
12800
13000
13200
13400
13600
13800
14000
Age (b2k)


0
500
1000
1500
2000
2500
S
u
l
f
a
t
e
 
(
n
g
/
g
)


NGRIP

Reduced Running Median (51 yr)

Volcano Detection Threshold


12000
12200
12400
12600
12800
13000
13200
13400
13600
13800
14000
Age (b2k)


0
500
1000
1500
S
u
l
f
a
t
e
 
(
n
g
/
g
)


WDC

Reduced Running Median (45yr)

Volcano Detection Threshold


12000
12200
12400
12600
12800
13000
13200
13400
13600
13800
14000
Age (b2k)


0
500
1000
1500
2000
2500
S
u
l
f
a
t
e
 
(
n
g
/
g
)


NEEM

Reduced Running Median (181 yr)

Volcano Detection Threshold


12000
12200
12400
12600
12800
13000
13200
13400
13600
13800
14000
Age (b2k)


0
500
1000
1500
S
u
l
f
a
t
e
 
(
n
g
/
g
)


EDML

Reduced Running Median (45yr)

Volcano Detection Threshold


12000
12200
12400
12600
12800
13000
13200
13400
13600
13800
14000
Age (b2k)


0
500
1000
1500
2000
2500
S
u
l
f
a
t
e
 
(
n
g
/
g
)


GISP2

Reduced Running Median (181yr)

Volcano Detection Threshold


12000
12200
12400
12600
12800
13000
13200
13400
13600
13800
14000
Age (b2k)


0
500
1000
1500
S
u
l
f
a
t
e
 
(
n
g
/
g
)


EDC

Reduced Running Median (45yr)

Volcano Detection Threshold


## Slide: Slide2
Figure S1 (c)

## Slide: Slide4
Figure S1 (d)

## Slide: Slide3
Figure S1 (e)

## Slide: Slide5
Figure S1 (f)

## Slide: Slide6
Figure S1 (g)

## Slide: Slide7
Figure S1 (h)

## Slide: Slide8
Figure S1 (i)

## Slide: Slide9
Figure S1 (j)

## Slide: Slide10
Figure S1 (k)

## Slide: Slide11
Figure S1 (l)

## Slide: Slide12
Figure S1 (m)

## Slide: Slide13
Figure S1 (n)

## Slide: Slide14
Figure S1 (o)

## Slide: Slide15
Figure S1 (p)

## Slide: Slide16
Figure S1 (q)

## Slide: Slide17
Figure S1 (r)

## Slide: Slide18
Figure S1 (s)

## Slide: Slide19
Figure S1 (t)

## Slide: Slide20
Figure S1 (u)

## Slide: Slide21
Figure S1 (v)

## Slide: Slide22
Figure S1 (w)

## Slide: Slide23
Figure S1 (x)

## Slide: Slide24
Figure S1 (y)
