# Supplementary material for: Magnitude, frequency and climate forcing of global volcanism during the last glacial period as seen in Greenland and Antarctic ice cores (60–9 ka)
Source: Copernicus journal article supplement (doi:10.5194/cp-18-485-2022), 2022-03-15
Supplement: Supplementary file 1 [file cp-18-485-2022-supplement.zip › Supplementary Fig.S2 and Fig.S11.odp]

## Slide: Slide160
Supplementary figures for Lin et al., Climate of the Past, 2021

## Slide: Slide104
Figure S2 
(a)
(b)
(c)
(d)

## Slide: Slide143
Figure S3
Slope: 1.09
R_square = 0.52
Slope: 0.51
R_square = 0.16
Slope: 0.62
R_square = 0.17
Slope: 1.24
R_square = 0.4
(b)
(a)
(d)
(c)
(e)
Slope: 0.79
R_square = 0.63

## Slide: Slide94
Figure S4
a
b
c

## Slide: Slide122
Log sulfate

3-year resolution
5-year resolution

1-year resolution
2-year resolution
Figure S5
(a)
(b)
(c)
(d)
(e)


## Slide: Slide139
NGRIP
Figure S6
Wavelength (mm)
Wavelength (mm)
Wavelength (mm)
Wavelength (mm)


## Slide: Slide108
NGRIP (1-year resolution)

Figure S7
NGRIP (2-year resolution)
NGRIP (3-year resolution)
NGRIP (5-year resolution)


H
DG
G
GI
GS


0
5
10
15
20
25
N
u
m
b
e
r
 
o
f
 
v
o
l
c
a
n
o
e
s
 
p
e
r
 
m
i
l
l
e
n
n
i
u
m

20-68


68-140


>140


(a)
(b)
(c)
(d)


H
DG
G
GI
GS


0
5
10
15
20
25
N
u
m
b
e
r
 
o
f
 
v
o
l
c
a
n
o
e
s
 
p
e
r
 
m
i
l
l
e
n
n
i
u
m

20-68


68-140


>140


(b)
H =  Holocene period (2-0 ka)
DG = Deglacial period (21-12 ka b2k)
G = Glacial period (60-21 ka b2k)
GI = Glacial interstadials of G
GS = Glacial stadials of G

## Slide: Slide111
Figure S8
Fig.S34


## Slide: Slide158
Figure S9

## Slide: Slide159
Figure S10
GS
Sodium (ppb)
(kg km-2)
(kg km-2)
(kg km-2)
(kg km-2)
GS
GI
GI
Sodium (ppb)

## Slide: Slide161
Figure S11
The same method as Sigl et al. (2015)
