# Supplementary material for: Magnitude, frequency and climate forcing of global volcanism during the last glacial period as seen in Greenland and Antarctic ice cores (60–9 ka)
Source: Copernicus journal article supplement (doi:10.5194/cp-18-485-2022), 2022-03-15
Supplement: Supplementary file 1 [file cp-18-485-2022-supplement.zip › Supplementary tables.xls]

## Sheet: Table S1
Ice core		Sufate record					Background determination	Thinning Function			ECM+DEP	Conductivity
Name	Location	Measurement techniques	Nominal depth resolution	Nominal temporal resolution	Reference	Effective depth resolution	Filter width	Name	Thinning factor	Reference	Reference	Reference
NEEM	77°27'N, 51°3.6'W	CFA-FIC SO4	Variable	~10 yr	(1)		181 yr	D–J model	0.10-0.34	(6)	(6)	(6)
NGRIP2	75°06' N, 42°19' W	CFA SO4	1 mm	0.04-0.10 yr	This work + (2)	8-20 mm	51 yr	ss09seabm1*	0.15-0.41	(7)	(11)	(7)
		IC SO4	55 cm	10-100 yr	(14)		Manual	ss09seabm1*		(7)	(11)	-
GISP2	72°36'N, 38°30' W	IC SO4	20 cm	6.2-18 yr	(3)		181 yr	Ice flow between the GRIP and GISP2 bore holes in Central Greenland	0.10-0.55	(8)	(12)	-
WDC	79°47' S, 112°09' W	CFA-ICP-MS	10 mm	0.1-1.8 yr	(4)	10-15 mm	45-91 yr	Firn densification modeling + ice-flow modeling	0.05-0.51	(9)	(9)	(4)
EDC96/EDC99	75°06' S, 123°21' E	FIC SO4	10-30 mm	1-5 yr	(5)	10-30 mm	45-91 yr	AICC2012	0.71-0.90	(10)	(13)	-
EDML	75°00' S, 00°04' E	FIC SO4	10-20 mm	0.5-1.69 yr	(5)	10-20 mm	45-91 yr	AICC2012	0.35-0.72	(10)
	* ss09seabm1 is the model timescale which include the layer thinning rate.
This goes into the table caption:
(1)	Schüpbach et al., Nature Communications, 2018
(2)	Bigler, PhD thesis, 2004 and Röthlisberger et al., 2000
(3)	Mayewski et al., JGR, 1997
(4)	WAIS Divide Project Members, Nature, 2013, and Sigl et al., JGR, 2016
(5)	Severi et al., CP, 2007
(6)	Rasmussen et al., CP, 2013
(7)	Johnsen et al., JQS, 2001
(8)	Hvidberg et al., JGR, 1997
(9)	Fudge et al., GRL, 2016, and Buizert et al., CP, 2015
(10)	Bazin et al., CP, 2013, and Veres et al.,CP, 2013
(11)	Dahl-Jensen et al., 2002
(12)	Taylor et al., 1997
(13)	Parrenin et al. 2012
(14)	Siggaard-Andersen, PhD thesis, 2004

## Sheet: Table S2
			Sulfate background (ng g-1)						Median absolute deviation (ng g-1)
	Period\Name		WDC	EDML	EDC	NGRIP	NEEM	GISP2	WDC	EDML	EDC	NGRIP	NEEM	GISP2
	Period (60-12 ka)		135±27	114±43	167±34	121±73	215±119	133±79	141±39	113±50	163±5	111±90	201±129	134±85
	DO events	Stadial				168±60	276±89	195±60				165±87	283±105	199±67
		Inter-stadial				59±28	85±37	67±20				59±37	83±46	67±27

## Sheet: Table S3
NGRIP				GISP2				NEEM				Age (b2k)	Average deposition (kg km-2)	1δ	Deposition (min-max. kg km-2)	NEEM correction	GISP2 correction
Deposition (kg km-2)	1δ	Depth (m)	Thinning	Deposition (kg km-2)	1δ	Depth (m)	Thinning	Deposition (kg km-2)	1δ	Depth (m)	Thinning
				30	7.8	1473.3	0.463025					9045.97	30	7.8	30
55.6	14.456	1305.65	0.49									9046.55	55.6	14.456	55.6
51.6	13.416	1306.05	0.49									9051.15	51.6	13.416	51.6
56.3	14.638	1306.4	0.49	57.8	15.028	1474	0.462751					9055.17	57.05	14.833	56.3-57.8
70.8	18.408	1309.95	0.49	71.5	18.59	1477.7	0.461403					9096.84	71.15	18.499	70.8-71.5
84.8	22.048	1316.22	0.48	74.8	19.448	1484.35	0.45917					9166.27	79.8	20.748	74.8-84.8
				50.3	13.078	1484.97	0.458897					9171.13	50.3	13.078	50.3
37.5	9.75	1316.95	0.48									9173.78	37.5	9.75	37.5
21.9	5.694	1327.97	0.48									9303.22	21.9	5.694	21.9
40.8	10.608	1328.5	0.48									9310.13	40.8	10.608	40.8
				19.8	5.148	1500.34	0.453771					9343.73	19.8	5.148	19.8
				30.3	7.878	1501.71	0.45329					9358.25	30.3	7.878	30.3
				30.8	8.008	1504.8	0.452278					9389.69	30.8	8.008	30.8
32.9	8.554	1335.32	0.48									9390.6	32.9	8.554	32.9
				21.8	5.668	1508.2	0.45111					9426.35	21.8	5.668	21.8
32.8	8.528	1339.25	0.48	35.1	9.126	1509.1	0.450766					9436.46	33.95	8.827	32.8-35.1
				62.1	16.146	1511.3	0.450101					9460.08	62.1	16.146	62.1
69.6	18.096	1341.35	0.47									9461.51	69.6	18.096	69.6
21.6	5.616	1347.4	0.47									9533.56	21.6	5.616	21.6
27.2	7.072	1347.72	0.47									9538.01	27.2	7.072	27.2
				110.6	28.756	1523.85	0.445891					9596	110.6	28.756	110.6
57	14.82	1352.74	0.47									9600.75	57	14.82	57
34.1	8.866	1352.95	0.47									9603.09	34.1	8.866	34.1
				19.8	5.148	1525.71	0.44524					9615.68	19.8	5.148	19.8
47.9	12.454	1354.54	0.47	11	2.86	1526.1	0.445115					9620.7	29.45	7.657	11-47.9
51.2	13.312	1357.4	0.47									9655.39	51.2	13.312	51.2
				20.3	5.278	1529.8	0.443933					9659.83	20.3	5.278	20.3
				23.5	6.11	1532.7	0.442962					9694	23.5	6.11	23.5
20.5	5.33	1360.91	0.47									9700.52	20.5	5.33	20.5
25.8	6.708	1364.03	0.46									9738.04	25.8	6.708	25.8
				64.4	16.744	1542.1	0.439789					9799.12	64.4	16.744	64.4
31.6	8.216	1369.4	0.46									9804.02	31.6	8.216	31.6
				39.7	10.322	1544.81	0.438918					9832.97	39.7	10.322	39.7
				22.8	5.928	1547.96	0.437875					9870.8	22.8	5.928	22.8
				40.8	10.608	1550.45	0.437021					9898.63	40.8	10.608	40.8
				77.3	20.098	1551.09	0.43684					9906.36	77.3	20.098	77.3
				23.1	6.006	1552.73	0.4363					9925.64	23.1	6.006	23.1
				52.7	13.702	1554.19	0.435819					9943.2	52.7	13.702	52.7
				22.7	5.902	1555.91	0.435268					9964.47	22.7	5.902	22.7
				26.1	6.786	1556.45	0.435019					9971.01	26.1	6.786	26.1
				88.1	22.906	1558.52	0.434335					9994.52	88.1	22.906	88.1
				103.8	26.988	1563.95	0.432507					10058.4	103.8	26.988	103.8
				119	30.94	1564.83	0.432275					10069.8	119	30.94	119
				32.1	8.346	1566.67	0.431647					10093.1	32.1	8.346	32.1
				25	6.5	1567.55	0.431361					10104.2	25	6.5	25
				33.1	8.606	1569.29	0.430795					10125.1	33.1	8.606	33.1
				87.1	22.646	1570.51	0.43039					10140.1	87.1	22.646	87.1
				110.9	28.834	1575.59	0.428696					10202.2	110.9	28.834	110.9
				30.9	8.034	1576.35	0.428422					10212.2	30.9	8.034	30.9
				73.1	19.006	1579.24	0.42749					10250	73.1	19.006	73.1
33	8.58	1409.81	0.42	189	49.14	1586.93	0.424904					10345.6	111	28.86	33-189
				147.3	38.298	1587.83	0.424624					10357.7	147.3	38.298	147.3
				136.7	35.542	1588.49	0.424347					10366.7	136.7	35.542	136.7
				24.6	6.396	1589.07	0.424182					10374.7	24.6	6.396	24.6
								69.9	18.174	1366.23		10392.7	69.9	18.174	69.9
				28	7.28	1591.03	0.423537					10401.2	28	7.28	28
				20	5.2	1593.79	0.422657					10438	20	5.2	20
				96	24.96	1594.67	0.422399					10449.8	96	24.96	96
28.77	7.4802	1419.15	0.42	312.5	81.25	1597.01	0.421602					10480.9	170.6	44.356	28.8-312.5
25	6.5	1421.11	0.42	37.5	9.75	1599.32	0.420852					10512.2	31.25	8.125	25-37.5
26.1	6.786	1424.16	0.42	49.2	12.792	1602.88	0.419636					10559.7	37.65	9.789	26.1-49.2
36.2	9.412	1426.13	0.42	61	15.86	1604.99	0.418905					10588.3	48.6	12.636	36.2-61
				21.3	5.538	1605.92	0.418646					10600.7	21.3	5.538	21.3
				26.7	6.942	1608.02	0.417974					10629.2	26.7	6.942	26.7
37	9.62	1429.83	0.42	11.1	2.886	1609.1	0.417565					10643.9	24.05	6.253	11.1-37
				49.7	12.922	1611.48	0.416749	49.1	12.766	1378.9		10675.7	49.4	12.844	49.1-49.7
				49.8	12.948	1614.37	0.415841	119.8	31.148	1380.71		10715.1	84.8	22.048	49.8-119.8
				33.8	8.788	1627.34	0.411449					10900.7	33.8	8.788	33.8
				26.9	6.994	1632.15	0.409804					10973.1	26.9	6.994	26.9
				29.2	7.592	1636.39	0.408363	45.2	11.752	1393.95		11036.8	37.2	9.672	29.2-45.2
				10.9	2.834	1637.87	0.4079	116.9	30.394	1395.62		11059	63.9	16.614	10.9-116.9
				112.5	29.25	1639.12	0.40749					11078	112.5	29.25	112.5
				23.9	6.214	1639.88	0.407217	82.3	21.398	1396.62		11090.2	53.1	13.806	23.9-82.3
				53.3	13.858	1640.71	0.406932					11102.1	53.3	13.858	53.3
				49.8	12.948	1641.07	0.406835					11107.3	49.8	12.948	49.8
				17.2	4.472	1641.47	0.406694	43.5	11.31	1397.73		11113.7	30.35	7.891	17.2-43.5
				44.5	11.57	1643.06	0.406166					11137.7	44.5	11.57	44.5
				22.4	5.824	1644.15	0.405793					11154.9	22.4	5.824	22.4
31.6	8.216	1464.22	0.42	37.6	9.776	1646.8	0.404855					11195.9	34.6	8.996	31.6-37.6
								120.8	31.408	1401.24		11205.6	120.8	31.408	120.8
								102.9	26.754	1402.85		11246.2	102.9	26.754	102.9
24.9	6.474	1468.02	0.42	25.2	6.552	1650.96	0.403439					11261.5	25.05	6.513	24.9-25.2
				20.3	5.278	1651.36	0.403308					11267.4	20.3	5.278	20.3
								189.3	49.218	1404.42		11283.9	189.3	49.218	189.3
313.1	81.406	1470.62	0.42	282.4	73.424	1653.8	0.40253					11303.7	297.75	77.415	282.4-313.1
34.2	8.892	1472.26	0.42	68.2	17.732	1655.64	0.401918					11332.8	51.2	13.312	34.2-68.2
								76.4	19.864	1407.12		11351.8	76.4	19.864	76.4
				34	8.84	1663.3	0.399264					11462.6	34	8.84	34
46.5	12.09	1479.69	0.42	62	16.12	1663.75	0.399133					11470.9	54.25	14.105	46.5-62
28.3	7.358	1481.64	0.42	15.7	4.082	1665.83	0.398399					11507.3	22	5.72	15.7-28.3
				19.9	5.174	1666.53	0.398139					11517.9	19.9	5.174	19.9
				67.2	17.472	1669.76	0.397031					11569.6	67.2	17.472	67.2
				37.4	9.724	1673.69	0.395661					11626.9	37.4	9.724	37.4
								94.5	24.57	1418.99		11670.7	94.5	24.57	94.5
				96.9	25.194	1678.15	0.394069					11705.4	96.9	25.194	96.9
				24.5	6.37	1678.75	0.393897					11723.6	24.5	6.37	24.5
				39.2	10.192	1681.45	0.392971					11808.2	39.2	10.192	39.2
				23.7	6.162	1682.9	0.392457					11855.5	23.7	6.162	23.7
20.7	5.382	1501.84	0.409799	43.4	11.284	1687.65	0.390765					12019	32.05	8.333	20.7-43.4
20.4	5.304	1502.97	0.409361					44.6	11.596	1426.98	0.295252	12055.5	32.5	8.45	20.4-44.6
45.2	11.752	1504.03	0.408954	21.9	5.694	1690	0.389938					12092	33.55	8.723	21.9-45.2
23.2	6.032	1504.37	0.408822									12104	23.2	6.032	23.2
22.8	5.928	1504.69	0.408699									12116	22.8	5.928	22.8
				28.2	7.332	1691.9	0.389285					12157.7	28.2	7.332	28.2
205.1	53.326	1506.12	0.408152	139.9	36.374	1692.2	0.389182	139.9	36.374	1428.99	0.294278	12169.5	248.633	85.4331	139.9-139.9	0.34905
25	6.5	1507.08	0.407785									12204.5	25	6.5	25
								68.6	17.836	1430.13	0.293722	12212.4	68.6	17.836	68.6
				34.6	8.996	1693.75	0.388667					12223.2	34.6	8.996	34.6
61	15.86	1508.04	0.407414	53.7	13.962	1694.2	0.388495					12240	57.35	14.911	53.7-61
39.1	10.166	1508.21	0.407352	23.5	6.11	1694.4	0.388427					12246	31.3	8.138	23.5-39.1
27.9	7.254	1508.98	0.407054									12272.5	27.9	7.254	27.9
22.8	5.928	1511.02	0.406273	51.2	13.312	1697.15	0.387428					12348	37	9.62	22.8-51.2
40.1	10.426	1511.16	0.40622					136.1	35.386	1432.95	0.292356	12353	88.1	22.906	40.1-136.1
105.7	27.482	1511.32	0.406157	100.9	26.234	1697.65	0.387248					12359	103.3	26.858	100.9-105.7
39	10.14	1512.13	0.405847	41.4	10.764	1698.4	0.386996					12390	40.2	10.452	39-41.4
21.6	5.616	1512.26	0.405798									12394.5	21.6	5.616	21.6
54.3	14.118	1513.21	0.405437									12428	54.3	14.118	54.3
				21.5	5.59	1699.6	0.386563					12432.3	21.5	5.59	21.5
50.2	13.052	1513.83	0.405199									12448	50.2	13.052	50.2
96.2	25.012	1516.25	0.404274					117	30.42	1436.94	0.290419	12534.5	106.6	27.716	96.2-117
76	19.76	1516.79	0.404066	100.9	26.234	1703.3	0.385232	119.1	30.966	1437.57	0.290113	12555.5	98.6667	42.7865	76-119.1
26.1	6.786	1517.19	0.403912									12570	26.1	6.786	26.1
295.5	76.83	1517.96	0.403616	263.2	68.432	1704.35	0.384872	119.3	31.018	1438.2	0.289814	12600.5	226	16.15	119.3-295.5
92.7	24.102	1518.44	0.403433	61.6	16.016	1704.95	0.384656					12621.5	77.15	20.059	61.6-92.7
52.5	13.65	1518.57	0.403385									12626.5	52.5	13.65	52.5		-
23.7	6.162	1519.11	0.403179					74.6	19.396	1439.15	0.289349	12646.5	49.15	12.779	23.7-74.6
				41.8	10.868	1706.4	0.384141					12679.1	41.8	10.868	41.8
40.5	10.53	1520.43	0.402681									12693.5	40.5	10.53	40.5
52.6	13.676	1520.71	0.402572									12703.5	52.6	13.676	52.6
21.6	5.616	1520.88	0.402507									12709	21.6	5.616	21.6
53.8	13.988	1521.33	0.40234	48.3	12.558	1707.7	0.383697					12723.5	51.05	13.273	48.3-53.8
30	7.8	1522.1	0.402045									12750	30	7.8	30
224	58.24	1522.21	0.402004	91.7	23.842	1708.55	0.383389					12754	157.85	41.041	91.7-224
20.1	5.226	1522.43	0.401922									12762	20.1	5.226	20.1
20.6	5.356	1524.73	0.401037									12840.5	20.6	5.356	20.6
336.7	87.542	1527.35	0.400021	192.6	50.076	1713.8	0.381546	215	55.9	1445.05	0.286504	12917.5	248.1	137.814	192.6-336.7
				27.7	7.202	1716.6	0.380515					12982.1	27.7	7.202	27.7
55.5	14.43	1530.46	0.3988	39.2	10.192	1717.2	0.38029					12994	47.35	12.311	39.2-55.5
79.9	20.774	1531.8	0.398277	313.7	81.562	1718.7	0.379689	424.7	110.422	1448.06	0.285066	13027.5	272.767	133.016	79.9-424.7
56.3	14.638	1535.03	0.397029									13114	56.3	14.638	56.3
27.5	7.15	1536.14	0.3966									13147	27.5	7.15	27.5
42.9	11.154	1538.36	0.395748	32.5	8.45	1725.6	0.377235					13211.5	37.7	9.802	32.5-42.9
20.4	5.304	1539.3	0.395386									13237.5	20.4	5.304	20.4
147.8	38.428	1541.6	0.394493	38.7	10.062	1729.4	0.375878					13298.5	93.25	24.245	38.7-147.8
								126.7	32.942	1457.7	0.280469	13434.4	126.7	32.942	126.7
26.2	6.812	1548.47	0.391806									13457.5	26.2	6.812	26.2
				276.8	71.968	1742.7	0.371026	302	78.52	1461.75	0.278555	13583.2	289.4	75.244	276.8-302
90	23.4	1549.5	0.389038					180	46.8	1462.45	0.278222	13619.5	135	35.1	90-180	0.3956	-
20	5.2	1555.6	0.389038					90	23.4	1462.47	0.278222	13620.5	55	14.3	20-90	0.1978
84.5	21.97	1555.7	0.389038					185	48.1	1462.52	0.278222	13621.5	134.75	35.035	84.5-185	0.406589
27.6	7.176	1559.27	0.38759									13709.5	27.6	7.176	27.6
33.4	8.684	1560.69	0.387039									13741	33.4	8.684	33.4
29	7.54	1562.13	0.386476									13773	29	7.54	29
20.5	5.33	1563.14	0.386083	47.3	12.298	1752.4	0.367501	82.5	21.45	1466.88	0.276131	13795	50.1	13.4	20.5-82.5
34.8	9.048	1564.34	0.38562	72.8	18.928	1753.7	0.366982					13819.5	53.8	13.988	34.8-72.8
29.9	7.774	1564.49	0.38556									13823	29.9	7.774	29.9		-
19.8	5.148	1571.19	0.382958	41.6	10.816	1761.3	0.364211	91.3	23.738	1471.21	0.274109	13971	50.9	10.9	19.8-91.3
27.7	7.202	1572.95	0.382281									14019	27.7	7.202	27.7
34.4	8.944	1573.88	0.381924	260.1	67.626	1763.9	0.363217					14048	147.25	38.285	34.4-260.1
34.2	8.892	1574.27	0.381779					213.1	55.406	1472.84	0.273352	14059	123.65	32.149	34.2-213.1
				42.7	11.102	1768	0.361747					14133.2	42.7	11.102	42.7
62.5	16.25	1577.54	0.380522									14138	62.5	16.25	62.5
12	3.12	1578.49	0.380153	150.9	39.234	1768.9	0.361379					14158.5	81.45	21.177	12-150.9
66.7	17.342	1578.63	0.380098									14162	66.7	17.342	66.7
17.6	4.576	1579.08	0.379926					48.3	12.558	1475.36	0.272168	14173.5	32.95	8.567	17.6-48.3
17.3	4.498	1580.71	0.379295					73.4	19.084	1476.31	0.27171	14210	45.35	11.791	17.3-73.4		-
				26.2	6.812	1772.6	0.360016					14227.2	26.2	6.812	26.2
51.1	13.286	1583.54	0.378201	86.3	22.438	1774.7	0.359174	88.8	23.088	1477.9	0.270971	14268	75.4	17.6	51.1-88.8
26.8	6.968	1583.81	0.378095									14274	26.8	6.968	26.8
								73	18.98	1479.8	0.270084	14334.9	73	18.98	73
				19.9	5.174	1783.8	0.355827					14434.4	19.9	5.174	19.9
114.6	29.796	1595.09	0.373734	102.6	26.676	1787.3	0.354574					14500	108.6	28.236	102.6-114.6
35.1	9.126	1595.77	0.373467	46	11.96	1788	0.354285					14513	40.55	10.543	35.1-46
86.9	22.594	1601.43	0.371284	74.1	19.266	1794.4	0.351898					14620	80.5	20.93	74.1-86.9
42.8	11.128	1604.76	0.370009									14696	42.8	11.128	42.8
55.3	14.378	1604.98	0.369929	74.8	19.448	1798	0.35054					14703	65.05	16.913	55.3-74.8
54.9	14.274	1605.71	0.369656									14731	54.9	14.274	54.9
221	57.46	1606.49	0.369371	173.8	45.188	1799.6	0.349937	528.7	137.462	1490.47	0.265175	14759.5	307.833	94.9085	173.8-528.7
42.9	11.154	1606.96	0.369199	66.1	17.186	1800.2	0.349711					14775.5	54.5	14.17	42.9-66.1
20.3	5.278	1607.44	0.369023					151.4	39.364	1490.98	0.26494	14791.5	85.85	22.321	20.3-151.4
58.7	15.262	1609.44	0.368288	42.6	11.076	1802.8	0.348734					14862.5	50.65	13.169	42.6-58.7
								66	17.16	1492.18	0.264394	14871.9	66	17.16	66
40.2	10.452	1610.84	0.367774									14917	40.2	10.452	40.2
71.1	18.486	1611.96	0.367363					92.2	23.972	1493.36	0.263852	14965	81.65	21.229	71.1-92.2
36	9.36	1612.7	0.367096									14994.5	36	9.36	36
24.8	6.448	1612.88	0.36703									15001.5	24.8	6.448	24.8
59	15.34	1613.3	0.366876	63.3	16.458	1806.6	0.347308					15019	61.15	15.899	59-63.3
								60	15.6	1495.53	0.262861	15128.9	60	15.6	60
21.2	5.512	1616.18	0.365843									15149	21.2	5.512	21.2
								49.9	12.974	1496.25	0.26253	15187.3	49.9	12.974	49.9
66.5	17.29	1617.14	0.365497									15192	66.5	17.29	66.5
25	6.5	1617.68	0.365303									15217	25	6.5	25
								66.4	17.264	1497.14	0.262121	15257.1	66.4	17.264	66.4
49.5	12.87	1618.78	0.364908									15264.5	49.5	12.87	49.5
22.5	5.85	1619	0.364832									15274	22.5	5.85	22.5
170	44.2	1619.5	0.364651	162.8	42.328	1812.8	0.344944	87.2	22.672	1497.68	0.261875	15294.5	140	3.6	87.2-170
79.9	20.774	1620.07	0.364447	53.7	13.962	1813.4	0.34471	86.9	22.594	1497.95	0.261753	15318	73.5	13.1	53.7-86.9
21	5.46	1620.44	0.364317									15334	21	5.46	21
22.3	5.798	1621.01	0.364111									15359	22.3	5.798	22.3
				33.4	8.684	1814.4	0.34432	30.5	7.93	1498.58	0.261465	15365	31.95	8.307	30.5-33.4
				32.2	8.372	1815	0.344086					15391.6	32.2	8.372	32.2		0.628007
								32.7	8.502	1499.45	0.261066	15429.8	32.7	8.502	32.7
35	9.1	1625.57	0.362482	133	34.58	1818.9	0.342673					15558	84	21.84	35-133
								38.7	10.062	1502.11	0.259856	15634.3	38.7	10.062	38.7
				20.1	5.226	1820.8	0.341917					15647	20.1	5.226	20.1
160.3	41.678	1627.95	0.361646	107.3	27.898	1821.3	0.341763					15669.5	133.8	34.788	107.3-160.3
179.1	46.566	1628.2	0.361557									15681.5	179.1	46.566	179.1	-
21.7	5.642	1629.92	0.360957					107.9	28.054	1503.6	0.259179	15765	64.8	16.848	21.7-107.9
26.7	6.942	1630.16	0.360875									15777	26.7	6.942	26.7
								44.8	11.648	1504.07	0.258961	15801.3	44.8	11.648	44.8
								127.7	33.202	1504.42	0.258801	15829.2	127.7	33.202	127.7
27.3	7.098	1631.59	0.360371									15843	27.3	7.098	27.3
47.4	12.324	1631.74	0.360319									15849	47.4	12.324	47.4
25.1	6.526	1632.97	0.359878									15900	25.1	6.526	25.1
				67.3	17.498	1826.8	0.339601					15934	67.3	17.498	67.3
28.3	7.358	1634.36	0.359381									15961.5	28.3	7.358	28.3
72.8	18.928	1635.05	0.359138									15991	72.8	18.928	72.8
47.8	12.428	1635.27	0.359059									16000	47.8	12.428	47.8
								88.8	23.088	1506.88	0.257687	16017.6	88.8	23.088	88.8
				64.3	16.718	1829.4	0.338601					16048.4	64.3	16.718	64.3
								124.2	32.292	1507.65	0.257337	16076.9	124.2	32.292	124.2		-
21.8	5.668	1637.2	0.358372									16083.5	21.8	5.668	21.8
				117.4	30.524	1831	0.337989					16123.3	117.4	30.524	117.4
				25.6	6.656	1831.8	0.337683					16161.7	25.6	6.656	25.6
46.7	12.142	1639.77	0.357476					46.4	12.064	1509.15	0.25666	16200	46.55	12.103	46.4-46.7
22.4	5.824	1640.47	0.357231									16230.5	22.4	5.824	22.4
								47.1	12.246	1509.76	0.256383	16247.8	47.1	12.246	47.1
85.4	22.204	1641.41	0.356898									16275	85.4	22.204	85.4
70.3	18.278	1641.94	0.356709					34.8	9.048	1510.39	0.256102	16299.5	52.55	13.663	34.8-70.3
106.9	27.794	1642.64	0.356461	138.3	35.958	1835.4	0.33631	317.3	82.498	1510.75	0.255935	16332.5	187.5	15.7	106.9-317.3
25.3	6.578	1643.76	0.356064									16379.5	25.3	6.578	25.3
								71.3	18.538	1512.12	0.255314	16424.8	71.3	18.538	71.3
34.1	8.866	1645.71	0.355372									16462.5	34.1	8.866	34.1
114.9	29.874	1645.86	0.355317	90.9	23.634	1838.6	0.335097					16469	102.9	26.754	90.9-114.9
								105.4	27.404	1513.07	0.254889	16490.8	105.4	27.404	105.4
				46.9	12.194	1839.8	0.334642					16519.4	46.9	12.194	46.9
								68.2	17.732	1513.74	0.25459	16539.4	68.2	17.732	68.2
69	17.94	1648.59	0.354338									16592.5	69	17.94	69
36.2	9.412	1649.17	0.354133									16618	36.2	9.412	36.2
65.6	17.056	1649.54	0.353999									16632.5	65.6	17.056	65.6
20.3	5.278	1650.32	0.353726									16662.5	20.3	5.278	20.3
26.1	6.786	1650.7	0.353591					60.3	15.678	1515.77	0.253673	16677.5	43.2	11.232	26.1-60.3
30	7.8	1651.22	0.353405									16700.5	30	7.8	30
36.9	9.594	1652.74	0.352866									16767	36.9	9.594	36.9
31.4	8.164	1653.27	0.352675									16789.5	31.4	8.164	31.4
54.6	14.196	1653.54	0.352577									16800.5	54.6	14.196	54.6
91.1	23.686	1653.93	0.352438									16818	91.1	23.686	91.1
21.3	5.538	1654.29	0.352307									16832	21.3	5.538	21.3
37.7	9.802	1654.67	0.352171									16847	37.7	9.802	37.7
29.1	7.566	1654.86	0.352102									16855	29.1	7.566	29.1		-
75.2	19.552	1656.17	0.35163					177.9	46.254	1519.14	0.252162	16914.5	126.55	32.903	75.2-177.9
								39.7	10.322	1519.47	0.252015	16945.4	39.7	10.322	39.7
36.1	9.386	1656.99	0.35134									16954	36.1	9.386	36.1
46.3	12.038	1657.16	0.351277									16962	46.3	12.038	46.3
48	12.48	1657.6	0.351123									16982	48	12.48	48		-
28.5	7.41	1657.7	0.351089									16986	28.5	7.41	28.5
24.6	6.396	1658.64	0.350755									17026	24.6	6.396	24.6
25.2	6.552	1658.75	0.350716									17031	25.2	6.552	25.2
				64.7	16.822	1852.4	0.329886					17036.7	64.7	16.822	64.7
20.2	5.252	1659.44	0.350471									17059.5	20.2	5.252	20.2
								119.2	30.992	1521.34	0.251172	17076.5	119.2	30.992	119.2
29.4	7.644	1660.29	0.350166	90.8	23.608	1853.8	0.329344					17096	60.1	15.626	29.4-90.8
52.2	13.572	1660.41	0.350124									17101	52.2	13.572	52.2
34	8.84	1661.17	0.34985									17131.5	34	8.84	34
20.9	5.434	1663.45	0.349033									17226.5	20.9	5.434	20.9		-
22.5	5.85	1664.88	0.348525									17292.5	22.5	5.85	22.5
								49.8	12.948	1524.58	0.249731	17303.2	49.8	12.948	49.8
25.8	6.708	1667.02	0.347765									17386.5	25.8	6.708	25.8
33	8.58	1667.39	0.347632									17403	33	8.58	33	-
49.2	12.792	1667.91	0.347449									17426	49.2	12.792	49.2	-
20.2	5.252	1668.6	0.347207					93.1	24.206	1526.78	0.248754	17457.5	56.65	14.729	20.2-93.1
								107.7	28.002	1527.96	0.248228	17548.8	107.7	28.002	107.7
				36.7	9.542	1866.8	0.32445					17633.6	36.7	9.542	36.7
20.6	5.356	1673.19	0.345582									17663.5	20.6	5.356	20.6
20.7	5.382	1674.35	0.345172									17712	20.7	5.382	20.7
37.1	9.646	1674.73	0.345037									17730.5	37.1	9.646	37.1
								61.7	16.042	1530.94	0.246904	17761.3	61.7	16.042	61.7
100.3	26.078	1677.14	0.344187									17833	100.3	26.078	100.3
20.8	5.408	1677.43	0.344088									17844.5	20.8	5.408	20.8
166.6	43.316	1677.72	0.343985									17857	166.6	43.316	166.6
28.1	7.306	1678.12	0.343846									17875.5	28.1	7.306	28.1
32.8	8.528	1679.32	0.343432									17926	32.8	8.528	32.8
29.6	7.696	1679.94	0.343218									17954	29.6	7.696	29.6
								62.4	16.224	1534.59	0.245288	18014.7	62.4	16.224	62.4
33.6	8.736	1681.57	0.342659									18028	33.6	8.736	33.6
								111.8	29.068	1535.32	0.244968	18070.2	111.8	29.068	111.8
108.4	28.184	1682.81	0.342236									18087.5	108.4	28.184	108.4
47.1	12.246	1683.92	0.34186									18133.5	47.1	12.246	47.1		-
22	5.72	1686.21	0.341067									18227	22	5.72	22
22.8	5.928	1686.41	0.340999									18235.5	22.8	5.928	22.8
29.5	7.67	1686.98	0.340804									18261	29.5	7.67	29.5
35.7	9.282	1687.72	0.340551	77.3	20.098	1883	0.318344					18294	56.5	14.69	35.7-77.3
513.7	133.562	1688.72	0.340213	167.2	43.472	1883.7	0.318036	218.7	56.862	1539.02	0.243341	18336.5	299.867	173.25	167.2-513.7
25.8	6.708	1689.21	0.340048									18358.5	25.8	6.708	25.8
71.1	18.486	1689.89	0.339817	26.3	6.838	1885	0.317575					18391.5	48.7	12.662	26.3-71.1
48.4	12.584	1690.18	0.33972									18406.5	48.4	12.584	48.4
24.9	6.474	1690.61	0.339573									18427	24.9	6.474	24.9
								107.6	27.976	1540.25	0.242801	18436.2	107.6	27.976	107.6
								51.7	13.442	1540.5	0.24269	18456.3	51.7	13.442	51.7
48.5	12.61	1692.26	0.339012									18502.5	48.5	12.61	48.5
49.1	12.766	1692.35	0.338983									18506	49.1	12.766	49.1
20.3	5.278	1693.79	0.338486									18571	20.3	5.278	20.3
								45.5	11.83	1542.24	0.241926	18588.7	45.5	11.83	45.5
52.5	13.65	1694.7	0.338169	78.3	20.358	1889.7	0.315813					18611	65.4	17.004	52.5-78.3
								75.5	19.63	1542.78	0.241691	18626.4	75.5	19.63	75.5
				33.3	8.658	1892.8	0.314679					18746.7	33.3	8.658	33.3
20.3	5.278	1698.42	0.336885									18772	20.3	5.278	20.3
26.2	6.812	1698.67	0.336797									18783.5	26.2	6.812	26.2
23.2	6.032	1699.37	0.336559									18814	23.2	6.032	23.2
98.5	25.61	1699.8	0.336411	66.5	17.29	1894.6	0.313997					18831.5	82.5	21.45	66.5-98.5
40.5	10.53	1699.91	0.336374									18836	40.5	10.53	40.5
23.8	6.188	1700.16	0.336288									18846	23.8	6.188	23.8
23.5	6.11	1701.11	0.335962									18887	23.5	6.11	23.5
24.2	6.292	1701.6	0.335792									18909.5	24.2	6.292	24.2
								97.4	25.324	1548.13	0.239358	19022.9	97.4	25.324	97.4
42.4	11.024	1704.37	0.334845									19037	42.4	11.024	42.4
				40.9	10.634	1899.4	0.312192					19046.1	40.9	10.634	40.9
25.7	6.682	1705.29	0.334529	61.7	16.042	1900.2	0.311892					19078	43.7	11.362	25.7-61.7
38.5	10.01	1705.49	0.334462									19087	38.5	10.01	38.5
								51.5	13.39	1549.16	0.238906	19101.7	51.5	13.39	51.5
76.5	19.89	1706.1	0.334254					99	25.74	1549.41	0.238799	19116	87.75	22.815	76.5-99
				58.7	15.262	1901.8	0.311296					19156.5	58.7	15.262	58.7
								116	30.16	1550.16	0.23847	19176.5	116	30.16	116
								139	36.14	1550.42	0.238358	19195.2	139	36.14	139
30.7	7.982	1708.16	0.333562									19207	30.7	7.982	30.7
21.2	5.512	1709.8	0.333013	79.3	20.618	1904.7	0.310179					19283.5	50.25	13.065	21.2-79.3
69.6	18.096	1710.07	0.332924									19296	69.6	18.096	69.6
24	6.24	1712.5	0.332101									19407	24	6.24	24
22.8	5.928	1712.8	0.332001									19420	22.8	5.928	22.8
32	8.32	1713.18	0.331875									19435	32	8.32	32
24.6	6.396	1714.03	0.33159									19473	24.6	6.396	24.6	-
41.6	10.816	1714.1	0.331566									19476	41.6	10.816	41.6	-
116.4	30.264	1714.19	0.331536	97.2	25.272	1908.7	0.308703					19480	106.8	27.768	97.2-116.4
33.5	8.71	1714.29	0.331504									19484.5	33.5	8.71	33.5
55.7	14.482	1715.4	0.331127									19533	55.7	14.482	55.7
105.1	27.326	1716.08	0.330897									19561.5	105.1	27.326	105.1
26.3	6.838	1717.74	0.330331									19635.5	26.3	6.838	26.3
29.6	7.696	1718.99	0.329906									19694	29.6	7.696	29.6
								94	24.44	1557.51	0.235289	19735.3	94	24.44	94
				122.1	31.746	1914.8	0.306505					19763.7	122.1	31.746	122.1
31	8.06	1720.74	0.329314									19780	31	8.06	31
20.7	5.382	1720.96	0.329241									19790	20.7	5.382	20.7
127.5	33.15	1721.32	0.329122	59.4	15.444	1915.6	0.306206	69.3	18.018	1558.43	0.234893	19805.5	85.4	34.05	59.4-127.5
								42.1	10.946	1559.04	0.234631	19853.4	42.1	10.946	42.1
				42.3	10.998	1917	0.305679					19863.6	42.3	10.998	42.3
65.1	16.926	1723.15	0.328503					44.1	11.466	1559.55	0.234406	19885.5	54.6	14.196	44.1-65.1
45.4	11.804	1724.59	0.328016									19950	45.4	11.804	45.4
37.4	9.724	1725.87	0.327589									20010.5	37.4	9.724	37.4
32.9	8.554	1727.18	0.327156									20069	32.9	8.554	32.9
28	7.28	1728.08	0.326857	100.1	26.026	1922.1	0.303803					20112	64.05	16.653	28-100.1
53.2	13.832	1728.16	0.326829									20116	53.2	13.832	53.2
101.2	26.312	1728.58	0.326691					79.1	20.566	1562.72	0.233043	20135.5	90.15	23.439	79.1-101.2
46.9	12.194	1729.15	0.326504									20161	46.9	12.194	46.9
43.5	11.31	1729.87	0.326264									20192.5	43.5	11.31	43.5
77.8	20.228	1731.6	0.325688	136.6	35.516	1925.6	0.302464					20265	107.2	27.872	77.8-136.6
28.7	7.462	1733.77	0.324974									20360	28.7	7.462	28.7
24.4	6.344	1733.83	0.324955	45.2	11.752	1927.8	0.301648					20363	34.8	9.048	24.4-45.2
				59.2	15.392	1928.2	0.301504					20389.9	59.2	15.392	59.2
50.8	13.208	1734.69	0.324678									20404.5	50.8	13.208	50.8
				33.9	8.814	1929	0.301208					20428.3	33.9	8.814	33.9
22.5	5.85	1735.95	0.324272									20465.5	22.5	5.85	22.5
83.4	21.684	1737.03	0.323925	114.4	29.744	1930.5	0.300693					20513	98.9	25.714	83.4-114.4
21.1	5.486	1737.13	0.323893									20518	21.1	5.486	21.1
24.7	6.422	1737.91	0.323642									20552	24.7	6.422	24.7
				47.4	12.324	1933.8	0.29945					20659.5	47.4	12.324	47.4
34.1	8.866	1741.4	0.3225									20712.5	34.1	8.866	34.1
114.8	29.848	1742.97	0.32198	50.8	13.208	1936.2	0.298577					20784	82.8	21.528	50.8-114.8
43.3	11.258	1745.47	0.321166									20907	43.3	11.258	43.3	-
79.4	20.644	1745.85	0.321045									20925	79.4	20.644	79.4
43.3	11.258	1745.95	0.32101									20930.5	43.3	11.258	43.3
20.9	5.434	1746.24	0.320919									20945	20.9	5.434	20.9
23	5.98	1746.32	0.320891					34.2	8.892	1572.27	0.228971	20949.5	28.6	7.436	23-34.2
49.9	12.974	1747.08	0.320652									20988	49.9	12.974	49.9
22.4	5.824	1748.59	0.320177					83.1	21.606	1573.6	0.228405	21068	52.75	13.715	22.4-83.1
								57	14.82	1573.95	0.228256	21109.6	57	14.82	57
26.9	6.994	1749.53	0.319878									21119	26.9	6.994	26.9
36	9.36	1749.68	0.319829									21127	36	9.36	36
21.8	5.668	1751.03	0.319398									21195.5	21.8	5.668	21.8
				32.4	8.424	1944.4	0.295623					21222.7	32.4	8.424	32.4
89.9	23.374	1751.75	0.319164					55.7	14.482	1575.2	0.227725	21232	72.8	18.928	55.7-89.9
				55.3	14.378	1944.79	0.295479					21243.3	55.3	14.378	55.3
69.2	17.992	1753.7	0.31854	129.2	33.592	1946.5	0.294889	185.2	48.152	1576.49	0.227179	21331.5	127.867	30	69.2-185.2
23.4	6.084	1754.45	0.318298	42.8	11.128	1947.2	0.294592					21369	33.1	8.606	23.4-42.8
25.8	6.708	1755.12	0.318082									21406	25.8	6.708	25.8
24.6	6.396	1755.96	0.317812									21450.5	24.6	6.396	24.6
26	6.76	1756.08	0.317775									21456.5	26	6.76	26
								105.8	27.508	1578.53	0.226317	21549.5	105.8	27.508	105.8
43	11.18	1758.5	0.317	31.5	8.19	1951.2	0.293115					21585	37.25	9.685	31.5-43
								60.9	15.834	1579.05	0.226096	21603.1	60.9	15.834	60.9
22.1	5.746	1759	0.316837	50	13	1951.8	0.292895					21611	36.05	9.373	22.1-50
								95.1	24.726	1579.51	0.225903	21646.4	95.1	24.726	95.1
								50.4	13.104	1579.73	0.225811	21669.8	50.4	13.104	50.4
21.7	5.642	1760.23	0.316441									21677.5	21.7	5.642	21.7
23.5	6.11	1761.36	0.316082									21736	23.5	6.11	23.5
								116.9	30.394	1581.5	0.225064	21843.3	116.9	30.394	116.9
23.5	6.11	1764.69	0.315036									21911	23.5	6.11	23.5
								74.5	19.37	1582.49	0.224649	21937.4	74.5	19.37	74.5
23	5.98	1767.29	0.314197	64.9	16.874	1960	0.289983					22052	43.95	11.427	23-64.9
				31.2	8.112	1961.8	0.289317					22144.4	31.2	8.112	31.2
				51	13.26	1963	0.288873					22207.8	51	13.26	51
50.7	13.182	1770.8	0.313061	57	14.82	1963.6	0.288651					22243	53.85	14.001	50.7-57
51.1	13.286	1773.18	0.312295									22371.5	51.1	13.286	51.1
24.3	6.318	1773.68	0.312139									22396.5	24.3	6.318	24.3
								73.9	19.214	1587.22	0.22266	22404.6	73.9	19.214	73.9
26.1	6.786	1775.93	0.311426									22508	26.1	6.786	26.1
								48.2	12.532	1588.64	0.222068	22527.7	48.2	12.532	48.2
								59.6	15.496	1589.87	0.221551	22639.6	59.6	15.496	59.6
36.2	9.412	1779.17	0.3104									22674	36.2	9.412	36.2
								23.8	6.188	1590.92	0.221112	22733.7	23.8	6.188	23.8
45	11.7	1782.13	0.309451	40.3	10.478	1975	0.284632					22820	42.65	11.089	40.3-45
20.5	5.33	1783	0.30917									22867.5	20.5	5.33	20.5
33	8.58	1784.42	0.308713									22937.5	33	8.58	33
38.4	9.984	1789.46	0.307109									23172.5	38.4	9.984	38.4
22.7	5.902	1789.78	0.307007									23191	22.7	5.902	22.7
26.1	6.786	1794.5	0.305475									23400	26.1	6.786	26.1
40.4	10.504	1797.63	0.304509	167	43.42	1990.2	0.279233	130.5	33.93	1600.4	0.217184	23577	112.633	71.0714	40.4-167
39.1	10.166	1798.1	0.304368	44.4	11.544	1990.8	0.279023					23603.5	41.75	10.855	39.1-44.4
42	10.92	1798.31	0.304308					77.8	20.228	1600.84	0.217	23614.5	59.9	15.574	42-77.8
30.7	7.982	1798.42	0.304275									23620.5	30.7	7.982	30.7
								112	29.12	1601.11	0.216892	23652.7	112	29.12	112
70.4	18.304	1802.25	0.303133									23862	70.4	18.304	70.4
35.2	9.152	1804.36	0.3025									24000	35.2	9.152	35.2
88.6	23.036	1805.36	0.302196									24067.5	88.6	23.036	88.6
79	20.54	1805.58	0.302128									24081	79	20.54	79
20.8	5.408	1806.09	0.301973									24114	20.8	5.408	20.8
191.1	49.686	1806.52	0.301845					125.3	32.578	1605.67	0.215012	24141.5	158.2	41.132	125.3-191.1
26.7	6.942	1807.03	0.301695									24175	26.7	6.942	26.7
				54	14.04	2000.4	0.275625					24251.3	54	14.04	54
				24.8	6.448	2001	0.275419					24288.8	24.8	6.448	24.8
23.5	6.11	1809.97	0.300821									24354.5	23.5	6.11	23.5
				78.4	20.384	2003.4	0.274595	101.5	26.39	1608.41	0.213886	24442	89.95	23.387	78.4-101.5
33.3	8.658	1811.59	0.300334									24453.5	33.3	8.658	33.3
23.7	6.162	1811.8	0.300271									24466	23.7	6.162	23.7
								38.2	9.932	1609.39	0.213488	24543.7	38.2	9.932	38.2
91.2	23.712	1814.62	0.299422									24648	91.2	23.712	91.2
198.3	51.558	1814.91	0.299335	147.4	38.324	2006.7	0.273411					24668	172.85	44.941	147.4-198.3
109.1	28.366	1815.08	0.299284					173.3	45.058	1610.54	0.213019	24679.5	141.2	36.712	109.1-173.3
21.1	5.486	1816.27	0.29893									24758	21.1	5.486	21.1
								54.2	14.092	1611.47	0.21264	24792.9	54.2	14.092	54.2
55	14.3	1817.28	0.298632	38.4	9.984	2009	0.272635					24828.5	46.7	12.142	38.4-55
								79.8	20.748	1611.85	0.212484	24841	79.8	20.748	79.8
23.6	6.136	1818.24	0.298354	68	17.68	2010	0.272282					24887	45.8	11.908	23.6-68
47.8	12.428	1818.78	0.298198					36.1	9.386	1612.53	0.212205	24919	41.95	10.907	36.1-47.8
								77.2	20.072	1613.16	0.211945	24986.5	77.2	20.072	77.2
68.5	17.81	1820.39	0.297719									25017.5	68.5	17.81	68.5
31.2	8.112	1821.27	0.297454									25069.5	31.2	8.112	31.2
92.4	24.024	1824	0.296645									25248	92.4	24.024	92.4
37.6	9.776	1824.51	0.296493									25283	37.6	9.776	37.6
32.1	8.346	1824.8	0.296406									25303.5	32.1	8.346	32.1
								55.6	14.456	1616.88	0.210434	25421.8	55.6	14.456	55.6
158.8	41.288	1827.2	0.295698					220.2	57.252	1617.17	0.210316	25459.5	189.5	49.27	158.8-220.2
								108.8	28.288	1617.54	0.210167	25502.1	108.8	28.288	108.8
								22.5	5.85	1617.95	0.210003	25552.3	22.5	5.85	22.5
								94.9	24.674	1618.15	0.20992	25576.1	94.9	24.674	94.9
40.3	10.478	1830.48	0.294736					81.8	21.268	1619.1	0.209534	25683.5	61.05	15.873	40.3-81.8
116.5	30.29	1831.58	0.294422	297.2	77.272	2022.6	0.267871	230.7	59.982	1619.72	0.209284	25749.6	214.8	90.35	116.5-297.2
25.5	6.63	1831.81	0.294358									25774	25.5	6.63	25.5
20.6	5.356	1831.92	0.294326									25781.5	20.6	5.356	20.6
54.8	14.248	1832.65	0.294119									25830	54.8	14.248	54.8
48.4	12.584	1832.98	0.294027	163.3	42.458	2024	0.267372					25852	105.85	27.521	48.4-163.3
43.6	11.336	1833.04	0.29401									25856	43.6	11.336	43.6
								225.2	58.552	1620.51	0.208966	25863.6	225.2	58.552	225.2
97.3	25.298	1834.25	0.293663					144.8	37.648	1621.08	0.208732	25939.5	121.05	31.473	97.3-144.8
46.4	12.064	1834.33	0.293638									25945.5	46.4	12.064	46.4
22.1	5.746	1834.57	0.293569									25962.5	22.1	5.746	22.1
								103.8	26.988	1621.42	0.208595	25980.1	103.8	26.988	103.8
23.6	6.136	1836.7	0.292949									26091	23.6	6.136	23.6
67.9	17.654	1837.36	0.292755	111.1	28.886	2028	0.265988	250.5	65.13	1622.94	0.20798	26131.5	143.167	21.6	67.9-250.5
28.1	7.306	1839.44	0.29213									26238.5	28.1	7.306	28.1
								75	19.5	1624.35	0.207411	26263	75	19.5	75
				93.1	24.206	2030.6	0.265092					26275.6	93.1	24.206	93.1
32.8	8.528	1841.18	0.291609									26333.5	32.8	8.528	32.8
42.2	10.972	1841.34	0.29156									26342.5	42.2	10.972	42.2
39.9	10.374	1842.23	0.291294	79	20.54	2032.5	0.264457					26393.5	59.45	15.457	39.9-79
20.7	5.382	1842.47	0.291222									26407.5	20.7	5.382	20.7
								118.3	30.758	1626.16	0.206682	26442.5	118.3	30.758	118.3
48	12.48	1843.15	0.291017	176.5	45.89	2033.2	0.264175					26448.5	112.25	29.185	48-176.5
50.4	13.104	1843.3	0.290971									26456.5	50.4	13.104	50.4
35.4	9.204	1843.66	0.290862	131.6	34.216	2033.8	0.263964					26475.5	83.5	21.71	35.4-131.6
22.9	5.954	1844.74	0.29055									26538	22.9	5.954	22.9
53.1	13.806	1845.26	0.290402									26573	53.1	13.806	53.1
28.3	7.358	1845.57	0.290316									26591	28.3	7.358	28.3
28	7.28	1846.45	0.290069									26646.5	28	7.28	28
27	7.02	1846.89	0.289942									26673	27	7.02	27
33.8	8.788	1847.19	0.289856									26690.5	33.8	8.788	33.8
32.2	8.372	1847.81	0.289673									26728.5	32.2	8.372	32.2
29.1	7.566	1850.08	0.28902					99.3	25.818	1630.3	0.205022	26862	64.2	16.692	29.1-99.3
20.2	5.252	1851.69	0.288555									26954	20.2	5.252	20.2
23.4	6.084	1853.26	0.288098					33.9	8.814	1632.02	0.204333	27046	28.65	7.449	23.4-33.9
53.1	13.806	1853.41	0.288054									27055	53.1	13.806	53.1
								35.1	9.126	1632.71	0.204058	27110.2	35.1	9.126	35.1
22.2	5.772	1855.03	0.287582									27147.5	22.2	5.772	22.2
138.4	35.984	1855.73	0.287375									27192.5	138.4	35.984	138.4
								64	16.64	1633.55	0.203724	27200.7	64	16.64	64
								82.4	21.424	1634.52	0.203336	27299.4	82.4	21.424	82.4
33.1	8.606	1858.2	0.286649									27337.5	33.1	8.606	33.1
32.9	8.554	1858.8	0.286477									27373.5	32.9	8.554	32.9
21	5.46	1859.32	0.28633									27404	21	5.46	21
20.5	5.33	1860.48	0.286003									27476	20.5	5.33	20.5
42.2	10.972	1861.48	0.285715									27530.5	42.2	10.972	42.2
39.7	10.322	1861.6	0.285681									27535.5	39.7	10.322	39.7
20.7	5.382	1861.9	0.285592									27547	20.7	5.382	20.7
				28.9	7.514	2050.5	0.25808					27561.5	28.9	7.514	28.9
35.2	9.152	1862.56	0.285394									27572	35.2	9.152	35.2
30.8	8.008	1863.98	0.284956	40.8	10.608	2051.9	0.257582					27620.5	35.8	9.308	30.8-40.8
37.3	9.698	1866.87	0.284048	18.3	4.758	2054.6	0.256622					27714.5	27.8	7.228	18.3-37.3
160.4	41.704	1869.56	0.283198					367.3	95.498	1641.38	0.200614	27798	263.85	68.601	160.4-367.3
60.4	15.704	1869.7	0.283155									27806	60.4	15.704	60.4
43.5	11.31	1869.77	0.283133									27811	43.5	11.31	43.5
				102.1	26.546	2059	0.255066					27936.6	102.1	26.546	102.1
70	18.2	1872.23	0.282424	138.2	35.932	2059.4	0.254925					27965.5	104.1	27.066	70-138.2
								28.4	7.384	1643.78	0.199666	28048.1	28.4	7.384	28.4
47.6	12.376	1874.71	0.281741									28121	47.6	12.376	47.6
25.9	6.734	1874.92	0.281684									28136	25.9	6.734	25.9
59.8	15.548	1875.56	0.281508									28178	59.8	15.548	59.8
26	6.76	1876.26	0.281314					40.2	10.452	1645.33	0.199054	28224	33.1	8.606	26-40.2
								77	20.02	1645.81	0.198865	28267.5	77	20.02	77
41	10.66	1877.94	0.280849									28329.5	41	10.66	41
40.5	10.53	1878.21	0.280776									28346	40.5	10.53	40.5
24	6.24	1879.48	0.28042									28425	24	6.24	24
79.8	20.748	1879.99	0.280279	176.2	45.812	2066	0.252559	201.1	52.286	1647.67	0.198132	28452.5	152.367	48.2	79.8-201.1
67.6	17.576	1881.29	0.279912									28529.5	67.6	17.576	67.6
22.3	5.798	1881.62	0.27982									28547	22.3	5.798	22.3
20.8	5.408	1882.98	0.279426									28614.5	20.8	5.408	20.8
24.9	6.474	1883.33	0.27932									28628.5	24.9	6.474	24.9
								112.3	29.198	1652.63	0.196171	28803	112.3	29.198	112.3
61.9	16.094	1891.73	0.27674	102.1	26.546	2076.6	0.248685					28907.5	82	21.32	61.9-102.1
56.7	14.742	1891.9	0.276687									28916.5	56.7	14.742	56.7
88.4	22.984	1892.34	0.276557									28941.5	88.4	22.984	88.4
36	9.36	1893.06	0.276351									28986	36	9.36	36
40.6	10.556	1893.53	0.27622									29015	40.6	10.556	40.6
22.3	5.798	1893.97	0.276098									29043	22.3	5.798	22.3
29.5	7.67	1894.53	0.275946									29080.5	29.5	7.67	29.5
29.8	7.748	1894.73	0.275891									29095.5	29.8	7.748	29.8
222.1	57.746	1895.23	0.275756									29130.5	222.1	57.746	222.1
37.3	9.698	1895.39	0.27571	79.4	20.644	2080	0.247442					29142.5	58.35	15.171	37.3-79.4
								94.9	24.674	1657.44	0.194319	29227.3	94.9	24.674	94.9
28.6	7.436	1896.8	0.275327									29241	28.6	7.436	28.6
27.1	7.046	1896.84	0.275316									29244	27.1	7.046	27.1
36.3	9.438	1898.34	0.274904	31.7	8.242	2082.4	0.246572					29349.5	34	8.84	31.7-36.3
31.9	8.294	1898.83	0.274768									29383	31.9	8.294	31.9
26.2	6.812	1898.89	0.274751									29387	26.2	6.812	26.2
37.8	9.828	1899.29	0.274642									29415	37.8	9.828	37.8
39.7	10.322	1900.41	0.274338									29500	39.7	10.322	39.7
67.3	17.498	1901.52	0.274044	69.7	18.122	2085.2	0.245558					29583	68.5	17.81	67.3-69.7
25.1	6.526	1901.83	0.273962	153.9	40.014	2085.6	0.245414					29603	89.5	23.27	25.1-153.9
57.9	15.054	1902.26	0.273852									29633.5	57.9	15.054	57.9
528.6	137.436	1902.89	0.273688	292.1	75.946	2086.6	0.245055	179.2	46.592	1661.29	0.192826	29680.5	333.3	216.118	179.2-528.6
206.1	53.586	1903.45	0.273545									29721.5	206.1	53.586	206.1	-
20.3	5.278	1904.58	0.273246									29800	20.3	5.278	20.3
				80.6	20.956	2088	0.244552					29820.4	80.6	20.956	80.6
43.4	11.284	1905.11	0.273105									29838.5	43.4	11.284	43.4
25.2	6.552	1905.6	0.272971									29871	25.2	6.552	25.2
30.1	7.826	1905.96	0.272875									29896	30.1	7.826	30.1
53	13.78	1907.81	0.272376									30020.5	53	13.78	53
45.1	11.726	1908.67	0.272147									30079.5	45.1	11.726	45.1
35.5	9.23	1908.89	0.272088									30095.5	35.5	9.23	35.5
								67.2	17.472	1665.26	0.191295	30145.7	67.2	17.472	67.2
24.5	6.37	1910.76	0.271598									30228.5	24.5	6.37	24.5
65.3	16.978	1910.97	0.271544	176.2	45.812	2092.9	0.242805	384.6	99.996	1666.03	0.190998	30243	208.7	55.45	65.3-384.6
								111.1	28.886	1666.44	0.190841	30282.1	111.1	28.886	111.1
26.5	6.89	1912.87	0.271038									30379.5	26.5	6.89	26.5
61.2	15.912	1913.02	0.270998									30389	61.2	15.912	61.2
43.1	11.206	1914.63	0.270564									30509.5	43.1	11.206	43.1
112.1	29.146	1915.58	0.270308									30569.5	112.1	29.146	112.1
								158.8	41.288	1669.96	0.189483	30633	158.8	41.288	158.8
50.7	13.182	1916.79	0.269973									30640.5	50.7	13.182	50.7
22.2	5.772	1917.68	0.269723									30692	22.2	5.772	22.2
26.3	6.838	1918.96	0.269355									30753	26.3	6.838	26.3
27.4	7.124	1922.5	0.268371									30957.5	27.4	7.124	27.4
31.7	8.242	1922.89	0.268264					118.8	30.888	1673.56	0.188109	30981	75.25	19.565	31.7-118.8
29.5	7.67	1923.18	0.268185									31001	29.5	7.67	29.5
								38.3	9.958	1674.62	0.187703	31092.7	38.3	9.958	38.3
32.8	8.528	1925.25	0.267624									31128	32.8	8.528	32.8
29.1	7.566	1925.39	0.267587									31136	29.1	7.566	29.1
28	7.28	1925.61	0.267528									31149	28	7.28	28
								120.4	31.304	1675.33	0.187433	31167.5	120.4	31.304	120.4
20.8	5.408	1926.98	0.267155									31240.5	20.8	5.408	20.8
61.4	15.964	1927.09	0.267124									31247	61.4	15.964	61.4
50.4	13.104	1927.34	0.267056									31261	50.4	13.104	50.4
43.9	11.414	1928.82	0.266658	73.1	19.006	2108	0.237224					31359	58.5	15.21	43.9-73.1
								105.9	27.534	1677.3	0.186685	31387.8	105.9	27.534	105.9
37.9	9.854	1929.87	0.266374	84.7	22.022	2108.8	0.236927					31426	61.3	15.938	37.9-84.7
				24	6.24	2109.2	0.236778					31457.6	24	6.24	24
441	114.66	1931.09	0.266043	261	67.86	2109.7	0.23663	195.1	50.726	1678.42	0.186261	31508.5	299.033	90	195.1-441
64.5	16.77	1931.43	0.265951	73	18.98	2110.2	0.23641					31531.5	68.75	17.875	64.5-73
								289.7	75.322	1678.69	0.186156	31544.4	289.7	75.322	289.7
67.2	17.472	1932.02	0.265792	45	11.7	2110.6	0.236267					31570.5	56.1	14.586	45-67.2
37.5	9.75	1932.11	0.265767					69.6	18.096	1679.03	0.186026	31576.5	53.55	13.923	37.5-69.6
68	17.68	1933.72	0.265335	159.9	41.574	2112.1	0.235698	283.8	73.788	1680.1	0.18562	31674.5	170.567	65.4514	68-283.8
101.1	26.286	1934.65	0.265082	121	31.46	2112.8	0.235484					31730.5	111.05	28.873	101.1-121
21.4	5.564	1935.4	0.264879					120.4	31.304	1680.9	0.185319	31776	70.9	18.434	21.4-120.4
								192	49.92	1681.52	0.185085	31835.8	192	49.92	192
29.2	7.592	1938.3	0.264096									31961	29.2	7.592	29.2
226.8	58.968	1939.54	0.263763	182.3	47.398	2117	0.233954	223.3	58.058	1683.44	0.184356	32031.5	210.8	22.25	182.3-226.8
41.2	10.712	1941.22	0.263292									32112.5	41.2	10.712	41.2
								75.5	19.63	1687.14	0.182952	32315.2	75.5	19.63	75.5
50.6	13.156	1946.53	0.261741	54.5	14.17	2122.95	0.231775					32324	52.55	13.663	50.6-54.5
								47	12.22	1687.6	0.182782	32346.2	47	12.22	47
31.6	8.216	1947.33	0.261508	35.7	9.282	2123.7	0.231528					32353.5	33.65	8.749	31.6-35.7
20.8	5.408	1948.73	0.261096									32404	20.8	5.408	20.8
29.9	7.774	1949.58	0.260844									32432.5	29.9	7.774	29.9
				21.9	5.694	2127	0.230371					32480.2	21.9	5.694	21.9
				30.6	7.956	2127.4	0.230231					32495.5	30.6	7.956	30.6
28.2	7.332	1951.85	0.260173									32508	28.2	7.332	28.2
28	7.28	1952.07	0.260109									32517.5	28	7.28	28
50.2	13.052	1952.16	0.260084									32522	50.2	13.052	50.2
								178	46.28	1691.34	0.181389	32628.1	178	46.28	178
20.6	5.356	1954.06	0.259563					99.9	25.974	1691.58	0.181302	32648	60.25	15.665	20.6-99.9
								73.4	19.084	1691.76	0.181234	32670.6	73.4	19.084	73.4
150.1	39.026	1954.62	0.259418									32683	150.1	39.026	150.1
21	5.46	1954.87	0.259354									32703	21	5.46	21
43.1	11.206	1955.62	0.259159									32756	43.1	11.206	43.1
64.2	16.692	1955.98	0.259065									32781	64.2	16.692	64.2
								71	18.46	1693.27	0.180669	32853.3	71	18.46	71
44.3	11.518	1957.16	0.258767									32862.5	44.3	11.518	44.3
45.2	11.752	1958.41	0.258444					254.5	66.17	1693.95	0.180416	32948.5	149.85	38.961	45.2-254.5
								86.4	22.464	1694.56	0.180192	33003.2	86.4	22.464	86.4
22.8	5.928	1959.41	0.258182									33016	22.8	5.928	22.8
52	13.52	1960.17	0.25798									33072.5	52	13.52	52
104.3	27.118	1961.03	0.257753	69.4	18.044	2135	0.227535	173	44.98	1695.55	0.179823	33136	115.567	17.45	69.4-173
45.7	11.882	1961.3	0.257681									33156	45.7	11.882	45.7
50.1	13.026	1962.25	0.257428									33221	50.1	13.026	50.1
30	7.8	1962.45	0.257375									33236.5	30	7.8	30
28.2	7.332	1963.87	0.256999									33335	28.2	7.332	28.2
35.4	9.204	1964.46	0.256842									33369.5	35.4	9.204	35.4
30.3	7.878	1967.32	0.256036									33481.5	30.3	7.878	30.3
32	8.32	1967.92	0.255862									33504	32	8.32	32
								34.2	8.892	1699.92	0.178184	33521.5	34.2	8.892	34.2
								42.3	10.998	1700.57	0.177945	33562	42.3	10.998	42.3
46.3	12.038	1973.06	0.254371									33682.5	46.3	12.038	46.3
				34	8.84	2148.4	0.222725					33826.5	34	8.84	34
32.2	8.372	1976.6	0.253364									33856.5	32.2	8.372	32.2
32.6	8.476	1976.67	0.253345									33861	32.6	8.476	32.6
35.1	9.126	1976.75	0.253323									33865.5	35.1	9.126	35.1
21.3	5.538	1977.26	0.253185									33895.5	21.3	5.538	21.3
31.5	8.19	1977.84	0.25303									33930.5	31.5	8.19	31.5
27.5	7.15	1978	0.252988									33940	27.5	7.15	27.5
33.9	8.814	1979.12	0.252688									34014	33.9	8.814	33.9
27.4	7.124	1979.7	0.252533									34050	27.4	7.124	27.4
128.5	33.41	1980.25	0.252387					381.3	99.138	1706.59	0.175737	34087.5	254.9	66.274	128.5-381.3
								73.9	19.214	1707.03	0.175575	34136.4	73.9	19.214	73.9
20.3	5.278	1981.39	0.252081									34164	20.3	5.278	20.3
86.5	22.49	1982.33	0.25183									34226.5	86.5	22.49	86.5
30.9	8.034	1983.07	0.251632									34275	30.9	8.034	30.9
36.8	9.568	1983.36	0.251554									34292.5	36.8	9.568	36.8
154.2	40.092	1983.52	0.25151	282.1	73.346	2154.6	0.220508					34302.5	218.15	56.719	154.2-282.1
23.4	6.084	1984.73	0.25119									34382	23.4	6.084	23.4
50.6	13.156	1984.79	0.251174									34386	50.6	13.156	50.6
46.3	12.038	1987.34	0.250497									34553	46.3	12.038	46.3
30.2	7.852	1987.92	0.250343									34594	30.2	7.852	30.2
119.3	31.018	1987.99	0.250323									34599	119.3	31.018	119.3
20.3	5.278	1988.54	0.250177									34635	20.3	5.278	20.3
107.6	27.976	1989.89	0.249819	494.4	128.544	2159.93	0.218666					34716.5	301	78.26	107.6-494.4
85.6	22.256	1990.16	0.249745									34732.5	85.6	22.256	85.6		-
73.9	19.214	1992.6	0.249069	41.3	10.738	2162.35	0.217764					34832	57.6	14.976	41.3-73.9
				35.4	9.204	2162.75	0.217619					34843.5	35.4	9.204	35.4
34.4	8.944	1993.99	0.248677	41	10.66	2163.65	0.217258					34889	37.7	9.802	34.4-41
								51.7	13.442	1714.59	0.172805	34899	51.7	13.442	51.7
				29.9	7.774	2164.6	0.216932					34930.3	29.9	7.774	29.9	-
				20.6	5.356	2165.3	0.21668					34962.3	20.6	5.356	20.6	-
12.3	3.198	1996.18	0.248067					93.2	24.232	1715.78	0.172372	34981	52.75	13.715	12.3-93.2
31.1	8.086	1997.72	0.247637	50.3	13.078	2167.01	0.21607					35047	40.7	10.582	31.1-50.3
21.5	5.59	1998.13	0.247522	45.3	11.778	2167.35	0.215926	103.4	26.884	1716.8	0.171998	35062.5	56.7333	11.9	21.5-103.4
23.7	6.162	2000.2	0.246935	48.8	12.688	2169.3	0.215244	56.3	14.638	1717.95	0.171578	35144	42.9333	12.55	23.7-56.3
								35.8	9.308	1719.17	0.171138	35221.6	35.8	9.308	35.8
				21.3	5.538	2172.6	0.214067					35275.7	21.3	5.538	21.3
				32.1	8.346	2174.8	0.213284	83.9	21.814	1721.42	0.170324	35363	58	15.08	32.1-83.9
24.7	6.422	2009.23	0.244381									35472	24.7	6.422	24.7
14.6	3.796	2009.38	0.244338	71.6	18.616	2177.65	0.212232					35477.5	43.1	11.206	14.6-71.6
34.1	8.866	2010.54	0.244018									35531	34.1	8.866	34.1
326.6	84.916	2011	0.243894	181.7	47.242	2179.02	0.21176	200.8	52.208	1724.22	0.169325	35557.5	236.367	133.545	181.7-326.6
26.2	6.812	2011.56	0.243748									35593	26.2	6.812	26.2
22.5	5.85	2011.99	0.243634									35623	22.5	5.85	22.5
31.3	8.138	2012.93	0.243389									35687	31.3	8.138	31.3
								114.8	29.848	1726.34	0.168563	35803.7	114.8	29.848	114.8
44	11.44	2015.36	0.242755									35852	44	11.44	44
22.6	5.876	2015.74	0.242659									35879	22.6	5.876	22.6
28	7.28	2016.08	0.242576									35902	28	7.28	28
45.9	11.934	2016.4	0.242496									35924.5	45.9	11.934	45.9
32.7	8.502	2016.79	0.242396									35952	32.7	8.502	32.7
84.9	22.074	2016.9	0.242369									35959	84.9	22.074	84.9
68.5	17.81	2016.99	0.242348									35964.5	68.5	17.81	68.5
23.3	6.058	2018.45	0.241976					129.6	33.696	1728.61	0.16775	36064.5	76.45	19.877	23.3-129.6
23.8	6.188	2020.45	0.24146									36202	23.8	6.188	23.8
								165	42.9	1729.97	0.167261	36217.9	165	42.9	165
44.2	11.492	2020.94	0.241334									36235.5	44.2	11.492	44.2
				108.7	28.262	2187.8	0.208594	60.1	15.626	1730.19	0.167182	36245.8	84.4	21.944	60.1-108.7
64.1	16.666	2021.33	0.241234									36260	64.1	16.666	64.1
59	15.34	2021.61	0.241163					155	40.3	1730.56	0.16705	36278	107	27.82	59-155
24.4	6.344	2022.09	0.241039									36309	24.4	6.344	24.4
69.8	18.148	2022.26	0.240993									36320.5	69.8	18.148	69.8
62.3	16.198	2026.19	0.239974									36550.5	62.3	16.198	62.3
								48.7	12.662	1733.49	0.166007	36571.2	48.7	12.662	48.7
46	11.96	2029.22	0.239172									36708	46	11.96	46
								72.4	18.824	1735.31	0.165352	36722.6	72.4	18.824	72.4
47.4	12.324	2032.33	0.238334									36846.5	47.4	12.324	47.4
25	6.5	2033.25	0.238088									36883	25	6.5	25
15.6	4.056	2033.65	0.23798					32.6	8.476	1737.73	0.164498	36904	24.1	6.266	15.6-32.6
21.2	5.512	2035.43	0.237505									36991	21.2	5.512	21.2
								44.7	11.622	1739.09	0.164014	37012.5	44.7	11.622	44.7
22.7	5.902	2036.94	0.237104									37058.5	22.7	5.902	22.7
40.6	10.556	2038.05	0.236808									37111	40.6	10.556	40.6	-
32.9	8.554	2038.43	0.236704									37129	32.9	8.554	32.9
				27.9	7.254	2204.9	0.202426	67.5	17.55	1741.62	0.163115	37206.5	47.7	12.402	27.9-67.5
35.6	9.256	2041.12	0.235977	18.2	4.732	2205.6	0.202168					37232.5	26.9	6.994	18.2-35.6
276.1	71.786	2042.38	0.235634	22.5	5.85	2206.6	0.201798					37280	149.3	38.818	22.5-276.1
27.3	7.098	2042.7	0.235547	44.7	11.622	2207.05	0.20165					37291.5	36	9.36	27.3-44.7
24.5	6.37	2044.14	0.235153	38.7	10.062	2208.4	0.201132					37344.5	31.6	8.216	24.5-38.7
35.6	9.256	2045	0.23492	15.9	4.134	2209.2	0.200836					37377.5	25.75	6.695	15.9-35.6
								53.8	13.988	1745.67	0.161687	37453.6	53.8	13.988	53.8
18.5	4.81	2048.88	0.233865	48.2	12.532	2212.8	0.199515					37516.5	33.35	8.671	18.5-48.2
18.2	4.732	2052.44	0.232893	27.3	7.098	2215.9	0.198412					37639.5	22.75	5.915	18.2-27.3
33	8.58	2052.89	0.23277	31.8	8.268	2216.39	0.198189	29.1	7.566	1748.94	0.160546	37654.5	31.3	0.6	29.1-33
67.5	17.55	2054.17	0.23242	124	32.24	2217.5	0.197817	80.5	20.93	1749.7	0.16028	37697	90.6667	28.25	67.5-124
22.5	5.85	2055.98	0.231927									37760	22.5	5.85	22.5
								27.4	7.124	1751.65	0.159596	37810.9	27.4	7.124	27.4
39.8	10.348	2058.24	0.231316									37838	39.8	10.348	39.8
23.6	6.136	2061.25	0.230502					31.1	8.086	1753.8	0.158853	37939	27.35	7.111	23.6-31.1
83.3	21.658	2061.95	0.230311	79.4	20.644	2224.7	0.195161	103.5	26.91	1754.24	0.158695	37963	88.7333	1.95	79.4-103.5
25.6	6.656	2065.47	0.229359									38074.5	25.6	6.656	25.6
13.8	3.588	2065.76	0.229281	84.5	21.97	2228.1	0.193853	182.4	47.424	1756.63	0.157868	38084	93.5667	35.35	13.8-182.4
236.1	61.386	2067.35	0.228849	312.5	81.25	2229.8	0.193273	79.6	20.696	1757.51	0.157559	38132.5	209.4	38.2	79.6-312.5
38.6	10.036	2067.81	0.228725									38146	38.6	10.036	38.6
				42.9	11.154	2232	0.192465					38213.2	42.9	11.154	42.9
37.6	9.776	2070.22	0.228076									38230	37.6	9.776	37.6
23.8	6.188	2071.96	0.227626									38335	23.8	6.188	23.8
20.2	5.252	2072.15	0.227578									38346	20.2	5.252	20.2
110	28.6	2072.45	0.227502	114.9	29.874	2234	0.191729	457.8	119.028	1760.52	0.156539	38363.5	227.567	2.45	110-457.8
28	7.28	2072.65	0.227453									38376.5	28	7.28	28
								201.4	52.364	1761.19	0.156311	38433.2	201.4	52.364	201.4
32.5	8.45	2073.81	0.227164									38453	32.5	8.45	32.5
36.9	9.594	2075.51	0.226742									38566.5	36.9	9.594	36.9
29	7.54	2075.97	0.226629									38595	29	7.54	29
21.4	5.564	2076.14	0.226588									38607	21.4	5.564	21.4
33.1	8.606	2076.5	0.2265									38633	33.1	8.606	33.1
29	7.54	2076.65	0.226463									38643	29	7.54	29
34.5	8.97	2077.35	0.226293									38689.5	34.5	8.97	34.5
27.5	7.15	2077.65	0.226219									38711	27.5	7.15	27.5
21	5.46	2077.89	0.226159									38727.5	21	5.46	21
57.5	14.95	2078.03	0.226126									38736.5	57.5	14.95	57.5
42.9	11.154	2078.37	0.226046									38758	42.9	11.154	42.9
								92.9	24.154	1764.72	0.155097	38775.8	92.9	24.154	92.9
151.7	39.442	2078.96	0.225903									38795.5	151.7	39.442	151.7
30.4	7.904	2079.05	0.225883									38800.5	30.4	7.904	30.4
24.1	6.266	2080.88	0.22544									38927.5	24.1	6.266	24.1
29.5	7.67	2080.95	0.225422									38932	29.5	7.67	29.5
25.7	6.682	2081.45	0.225301									38961	25.7	6.682	25.7
								67.9	17.654	1766.68	0.154428	38980.9	67.9	17.654	67.9
44.4	11.544	2082.15	0.225128	176.2	45.812	2242	0.188736	72.4	18.824	1766.88	0.154361	39006	97.6667	65.9	44.4-176.2
61.1	15.886	2082.43	0.225059									39024	61.1	15.886	61.1
24	6.24	2083.31	0.22485									39084.5	24	6.24	24
54.3	14.118	2083.83	0.224726									39122	54.3	14.118	54.3
				66.1	17.186	2244.8	0.187604					39256.3	66.1	17.186	66.1
130	33.8	2087.33	0.223898									39368.5	130	33.8	130
								140.3	36.478	1770.35	0.153175	39388.7	140.3	36.478	140.3
41.1	10.686	2087.84	0.223777	255.5	66.43	2246.2	0.187084					39399.5	148.3	38.558	41.1-255.5
27	7.02	2088.04	0.223728									39415	27	7.02	27
								87.3	22.698	1770.91	0.152987	39448.5	87.3	22.698	87.3
30	7.8	2088.71	0.223569									39460.5	30	7.8	30
								152.7	39.702	1771.17	0.152899	39481.1	152.7	39.702	152.7
66.8	17.368	2089.07	0.223484									39489	66.8	17.368	66.8
24.5	6.37	2089.63	0.223352									39531	24.5	6.37	24.5
38.3	9.958	2089.95	0.223275									39553.5	38.3	9.958	38.3
21.7	5.642	2090.73	0.223091					212.7	55.302	1772.26	0.152529	39610	117.2	30.472	21.7-212.7
31.4	8.164	2090.99	0.223028									39629	31.4	8.164	31.4
25.6	6.656	2091.17	0.222986									39641	25.6	6.656	25.6
				81.2	21.112	2249.6	0.185838					39686.9	81.2	21.112	81.2
43.6	11.336	2091.97	0.222794									39702	43.6	11.336	43.6
				116.6	30.316	2250	0.185692	160.7	41.782	1773.33	0.152169	39724.7	138.65	36.049	116.6-160.7
								75.6	19.656	1773.74	0.152028	39788.2	75.6	19.656	75.6
158.5	41.21	2094.12	0.222282									39867.5	158.5	41.21	158.5	-
137.1	35.646	2094.87	0.222104	455.9	118.534	2252	0.18499	355	92.3	1774.9	0.151634	39913.5	316	159.4	137.1-455.9
36.1	9.386	2095.57	0.221936									39958.5	36.1	9.386	36.1
22.9	5.954	2095.77	0.221887									39970.5	22.9	5.954	22.9
156.2	40.612	2100.02	0.220815	78.4	20.384	2256.61	0.183368	399.9	103.974	1777.85	0.150637	40182	211.5	38.9	78.4-399.9
20.4	5.304	2100.13	0.220787									40188	20.4	5.304	20.4
								151	39.26	1778.2	0.150522	40219.2	151	39.26	151
22.8	5.928	2100.88	0.220604	56.2	14.612	2257	0.183226					40233	39.5	10.27	22.8-56.2
								53.5	13.91	1778.66	0.150365	40270.8	53.5	13.91	53.5
127.6	33.176	2101.65	0.220416									40281	127.6	33.176	127.6
27	7.02	2103.3	0.220018									40380.5	27	7.02	27
				91.9	23.894	2260	0.182159					40472.2	91.9	23.894	91.9
22.8	5.928	2105.45	0.219496									40525.5	22.8	5.928	22.8
34.3	8.918	2106.49	0.219248					97.2	25.272	1781.53	0.149403	40594.5	65.75	17.095	34.3-97.2
54.3	14.118	2106.96	0.219137					40.6	10.556	1781.91	0.149275	40624	47.45	12.337	40.6-54.3
								78.3	20.358	1782.35	0.149128	40677.3	78.3	20.358	78.3
27.9	7.254	2108.49	0.218782									40722.5	27.9	7.254	27.9
								79	20.54	1783.55	0.148725	40809.8	79	20.54	79
27.5	7.15	2110.4	0.218337									40843	27.5	7.15	27.5
26.4	6.864	2110.81	0.218239									40866.5	26.4	6.864	26.4
107.8	28.028	2111.57	0.218056	200.5	52.13	2265.6	0.180143	94.3	24.518	1784.5	0.148406	40911.5	134.2	46.35	94.3-200.5
27.9	7.254	2113.57	0.217567									41017.5	27.9	7.254	27.9
50.2	13.052	2115.42	0.217103									41109	50.2	13.052	50.2
180.2	46.852	2116.11	0.216931	289.2	75.192	2269.5	0.178789	760.5	197.73	1786.94	0.147589	41140.5	409.967	119.189	180.2-760.5
				39.8	10.348	2270	0.178575	44.5	11.57	1787.25	0.147485	41161.8	42.15	10.959	39.8-44.5
60.6	15.756	2118.62	0.216297					42.9	11.154	1788.43	0.147093	41248.5	51.75	13.455	42.9-60.6
34.7	9.022	2118.89	0.216229									41258.5	34.7	9.022	34.7
24.3	6.318	2120.53	0.215815									41324.5	24.3	6.318	24.3
65.1	16.926	2121.84	0.215485	56.4	14.664	2274.5	0.177026					41377.5	60.75	15.795	56.4-65.1
								128.1	33.306	1791.89	0.145952	41519.1	128.1	33.306	128.1
31.3	8.138	2127.07	0.214203					126.2	32.812	1793.1	0.145551	41660	78.75	20.475	31.3-126.2
46.4	12.064	2127.33	0.214142									41678	46.4	12.064	46.4
22.7	5.902	2128.35	0.213905									41750.5	22.7	5.902	22.7
				68	17.68	2280	0.175032					41766.9	68	17.68	68
48.7	12.662	2128.95	0.213765	46.9	12.194	2280.4	0.174891	214.5	55.77	1794.21	0.145187	41795	103.367	22.4777	46.9-214.5
								110.5	28.73	1794.58	0.145065	41838.6	110.5	28.73	110.5
								33.9	8.814	1794.78	0.144999	41863.3	33.9	8.814	33.9
								89.9	23.374	1795.02	0.14492	41893.3	89.9	23.374	89.9
90.8	23.608	2131.35	0.213215									41970.5	90.8	23.608	90.8
21.5	5.59	2131.76	0.213121									42001.5	21.5	5.59	21.5
21.1	5.486	2132.09	0.213044									42027	21.1	5.486	21.1
178	46.28	2132.22	0.213016					477.4	124.124	1796.13	0.144553	42036.5	327.7	85.202	178-477.4
45.5	11.83	2132.74	0.212896									42073	45.5	11.83	45.5
45.4	11.804	2133	0.212836									42091	45.4	11.804	45.4
								478.1	124.306	1796.77	0.144343	42102.3	478.1	124.306	478.1
23.3	6.058	2133.25	0.212778									42109	23.3	6.058	23.3
20.8	5.408	2133.65	0.212684									42140.5	20.8	5.408	20.8
29.2	7.592	2134.48	0.212492									42201.5	29.2	7.592	29.2
22.2	5.772	2135.1	0.212345					343.8	89.388	1798.02	0.14393	42247.5	183	47.58	22.2-343.8
46	11.96	2135.99	0.212135									42299	46	11.96	46
59.6	15.496	2136.97	0.211901					55.4	14.404	1798.94	0.143627	42355	57.5	14.95	55.4-59.6
29.9	7.774	2138.06	0.211638									42417.5	29.9	7.774	29.9	-
				27.6	7.176	2289	0.171848	53.5	13.91	1800.43	0.14314	42509.1	40.55	10.543	27.6-53.5
25.9	6.734	2140.42	0.21107									42549.5	25.9	6.734	25.9
				33.8	8.788	2290	0.171493					42577.9	33.8	8.788	33.8
169.1	43.966	2142.35	0.210609	74.4	19.344	2291	0.171143	155.9	40.534	1801.79	0.142696	42657	133.133	47.35	74.4-169.1
								87.3	22.698	1802.53	0.142452	42720.8	87.3	22.698	87.3
25.8	6.708	2146.79	0.209525	37.8	9.828	2294.8	0.169809	37.3	9.698	1804.41	0.141836	42885	33.6333	6	25.8-37.8
								49.1	12.766	1806.3	0.141221	43042	49.1	12.766	49.1
23.9	6.214	2151.67	0.208321									43098.5	23.9	6.214	23.9
55	14.3	2151.79	0.208291	82.9	21.554	2299.2	0.168248	83.7	21.762	1807.02	0.140987	43103.5	73.8667	34.3794	55-83.7		0.7337
				21.4	5.564	2300.4	0.167824					43162	21.4	5.564	21.4
								31.2	8.112	1808.15	0.14062	43181	31.2	8.112	31.2
12.1	3.146	2154.27	0.207684	26.8	6.968	2301.2	0.167543					43203	19.45	5.057	12.1-26.8
11.7	3.042	2154.38	0.207657					47.2	12.272	1808.55	0.140492	43208	29.45	7.657	11.7-47.2
48	12.48	2156.49	0.207145					91.6	23.816	1809.6	0.14015	43296	69.8	18.148	48-91.6
62.1	16.146	2157.68	0.206855									43352.5	62.1	16.146	62.1
48.6	12.636	2157.88	0.206809									43365.5	48.6	12.636	48.6
34.2	8.892	2158.15	0.206744									43385	34.2	8.892	34.2
49.2	12.792	2158.29	0.206711									43395.5	49.2	12.792	49.2
54.9	14.274	2158.6	0.206639									43418.5	54.9	14.274	54.9
20.3	5.278	2158.88	0.206574									43438	20.3	5.278	20.3
				99.6	25.896	2305.4	0.166068	359.4	93.444	1811.29	0.139616	43469.4	229.5	59.67	99.6-359.4
88.4	22.984	2159.48	0.206437									43480.5	88.4	22.984	88.4
53.9	14.014	2159.79	0.206367									43502	53.9	14.014	53.9
21.8	5.668	2160.35	0.206242									43549	21.8	5.668	21.8
20.7	5.382	2161.34	0.20603									43627.5	20.7	5.382	20.7
68.9	17.914	2161.73	0.205943	64.9	16.874	2307.4	0.165359	195.6	50.856	1812.7	0.139098	43659	109.8	2	64.9-195.6	0.494444
135.4	35.204	2162	0.205885					200	52	1812.9	0.139098	43678.5	167.7	43.602	135.4-200	0.505566
								37.7	9.802	1813.24	0.138986	43726.4	37.7	9.802	37.7
				32.4	8.424	2309.2	0.16472					43836.4	32.4	8.424	32.4
34	8.84	2164.7	0.20528	39	10.14	2309.8	0.164508	241.6	62.816	1814.47	0.13859	43884	104.867	17.2634	34-241.6
34.1	8.866	2165.21	0.205166	86.7	22.542	2310.2	0.164363					43923	60.4	15.704	34.1-86.7
22.5	5.85	2166.61	0.204853									44028.5	22.5	5.85	22.5
49.6	12.896	2167.04	0.20476									44060	49.6	12.896	49.6
								195.8	50.908	1816.18	0.138042	44103.8	195.8	50.908	195.8
42.9	11.154	2168.71	0.204392									44190	42.9	11.154	42.9
25.2	6.552	2170.36	0.204029									44303.5	25.2	6.552	25.2
30.6	7.956	2170.95	0.203896									44344	30.6	7.956	30.6
120.2	31.252	2171.4	0.203794	86.3	22.438	2315	0.162685	160.5	41.73	1818.42	0.137323	44371	122.333	16.95	86.3-160.5
98.6	25.636	2173.9	0.203209									44507	98.6	25.636	98.6
41	10.66	2174.11	0.203159									44519	41	10.66	41
31.9	8.294	2174.51	0.203065									44540.5	31.9	8.294	31.9
56.6	14.716	2175.16	0.202915	69.7	18.122	2318.2	0.161551					44582	63.15	16.419	56.6-69.7
36.6	9.516	2175.87	0.202751	79.6	20.696	2318.8	0.161338	86.2	22.412	1821.05	0.136486	44629	67.4667	32.4789	36.6-86.2
83.1	21.606	2177.68	0.202336	70.5	18.33	2320.2	0.160844					44743.5	76.8	19.968	70.5-83.1
								63.2	16.432	1822.08	0.136158	44751.6	63.2	16.432	63.2
68.4	17.784	2177.98	0.202266	270.9	70.434	2320.6	0.160704					44763	169.65	44.109	68.4-270.9
								24.1	6.266	1823.07	0.135843	44861.9	24.1	6.266	24.1
196.8	51.168	2180.49	0.201691	89.8	23.348	2322.6	0.160005	216	56.16	1823.42	0.135732	44916	167.533	80.3932	89.8-216
19.3	5.018	2180.85	0.20161	61.8	16.068	2323	0.159865	116.9	30.394	1823.73	0.135634	44937	66	25.7695	19.3-116.9
25.1	6.526	2182.77	0.201167	77.6	20.176	2324.5	0.159376					45050	51.35	13.351	25.1-77.6
								23.3	6.058	1826.95	0.134615	45280.7	23.3	6.058	23.3
25.5	6.63	2187.14	0.200159	48	12.48	2328.4	0.15797	31.5	8.19	1827.14	0.134554	45304.5	35	11.25	25.5-48
				43	11.18	2329.1	0.157759	21.5	5.59	1827.62	0.134402	45346.6	32.25	8.385	21.5-43
								38.7	10.062	1828.31	0.134184	45423.4	38.7	10.062	38.7
29	7.54	2191.24	0.199214									45519.5	29	7.54	29
70.2	18.252	2191.36	0.199186	69.1	17.966	2332	0.156697					45525	69.65	18.109	69.1-70.2
612.3	159.198	2191.99	0.19904	200.4	52.104	2332.6	0.156484	849.5	220.87	1829.94	0.133669	45555	652.633	205.95	200.4-849.5	0.741808
30.7	7.982	2192.4	0.198945	188.5	49.01	2333.1	0.156272					45575	109.6	28.496	30.7-188.5
35.4	9.204	2195.56	0.198208									45725.5	35.4	9.204	35.4
16.6	4.316	2197.28	0.197807					53.5	13.91	1832.59	0.132836	45803	35.05	9.113	16.6-53.5
41.7	10.842	2197.8	0.197686					77.5	20.15	1832.88	0.132745	45825.5	59.6	15.496	41.7-77.5
								79.3	20.618	1833.52	0.132544	45877.9	79.3	20.618	79.3
99.5	25.87	2199.22	0.197355	86.5	22.49	2339	0.154234					45890	93	24.18	86.5-99.5
14.3	3.718	2200.49	0.197061	36.1	9.386	2340.2	0.153814					45950	25.2	6.552	14.3-36.1
								30.2	7.852	1834.57	0.132218	45968.7	30.2	7.852	30.2
97.5	25.35	2201.54	0.196816	101.3	26.338	2341	0.153533	124.5	32.37	1834.86	0.132125	46001	107.767	1.9	97.5-124.5
34.7	9.022	2202.23	0.196656	36.4	9.464	2341.8	0.153251	111.9	29.094	1835.34	0.131975	46032.5	61	16.7125	34.7-111.9
41.2	10.712	2204.14	0.19621	68.4	17.784	2343.4	0.152688	89.9	23.374	1836.35	0.13166	46115.5	66.5	28.0631	41.2-89.9
16.7	4.342	2206.01	0.195776	75.3	19.578	2344.9	0.152195	43.4	11.284	1837.3	0.131363	46194	45.1333	29.3	16.7-75.3
20.3	5.278	2207.14	0.195513									46243.5	20.3	5.278	20.3
26.3	6.838	2209.63	0.194936					49	12.74	1839.32	0.130735	46351.5	37.65	9.789	26.3-49
41.3	10.738	2210.9	0.194641	30.9	8.034	2349.4	0.150589					46405.5	36.1	9.386	30.9-41.3
15.2	3.952	2211.92	0.194406	47.3	12.298	2350.2	0.15031					46450	31.25	8.125	15.2-47.3
				32.7	8.502	2350.8	0.150098					46478.6	32.7	8.502	32.7
				31.2	8.112	2351.2	0.149957					46499.4	31.2	8.112	31.2
111.3	28.938	2214.38	0.193835	77.9	20.254	2352.39	0.149541	40.5	10.53	1842.02	0.129897	46558	76.5667	16.7	40.5-111.3
32.6	8.476	2215.49	0.193577	46.9	12.194	2353.2	0.149252	36.9	9.594	1842.57	0.129726	46602	38.8	19.5694	32.6-46.9
21.4	5.564	2217.22	0.193175									46667	21.4	5.564	21.4
92.9	24.154	2217.59	0.19309	117.3	30.498	2354.9	0.148688					46680.5	105.1	27.326	92.9-117.3		0.714355
				21.9	5.694	2356.4	0.148123					46735.3	21.9	5.694	21.9
				26	6.76	2356.8	0.147981					46753.5	26	6.76	26
				98.5	25.61	2357.3	0.147769					46775.6	98.5	25.61	98.5
				126.8	32.968	2359.2	0.147132					46870.3	126.8	32.968	126.8
				45.6	11.856	2360.4	0.14671					46971.1	45.6	11.856	45.6
332.8	86.528	2224.63	0.191488	207.5	53.95	2360.9	0.146571	226	58.76	1848.2	0.128003	47023	255.433	62.65	207.5-332.8
								49.8	12.948	1848.38	0.127947	47044.4	49.8	12.948	49.8
				80.6	20.956	2361.8	0.146223					47103.5	80.6	20.956	80.6
								60.1	15.626	1849	0.127758	47128.3	60.1	15.626	60.1
23.7	6.162	2226.25	0.191151									47143	23.7	6.162	23.7
91.4	23.764	2226.61	0.191075									47170	91.4	23.764	91.4
67.7	17.602	2226.75	0.191046									47180.5	67.7	17.602	67.7
190.1	49.426	2227.21	0.190951					61	15.86	1850.18	0.127395	47213	125.55	32.643	61-190.1
83	21.58	2227.42	0.190907									47229	83	21.58	83
22.3	5.798	2228.18	0.19075	97.3	25.298	2363.6	0.145597					47287.5	59.8	15.548	22.3-97.3
								172.3	44.798	1850.86	0.12719	47390.3	172.3	44.798	172.3
								83.4	21.684	1851.03	0.127139	47415	83.4	21.684	83.4
51.9	13.494	2229.98	0.190377									47422.5	51.9	13.494	51.9
145.3	37.778	2230.15	0.190343									47436.5	145.3	37.778	145.3
23	5.98	2230.31	0.190309									47449	23	5.98	23
123.7	32.162	2230.43	0.190285									47457.5	123.7	32.162	123.7
36	9.36	2231.81	0.190007									47568.5	36	9.36	36
48.3	12.558	2232.12	0.189943									47593.5	48.3	12.558	48.3
27.7	7.202	2232.73	0.189817									47643	27.7	7.202	27.7
20.9	5.434	2233.26	0.189706									47686.5	20.9	5.434	20.9
32.3	8.398	2234.27	0.1895									47771	32.3	8.398	32.3
								85.6	22.256	1854.17	0.126183	47893.7	85.6	22.256	85.6
58.8	15.288	2235.9	0.189171									47902.5	58.8	15.288	58.8
								245.2	63.752	1854.65	0.126036	47972.4	245.2	63.752	245.2
27.2	7.072	2236.92	0.188964									47990	27.2	7.072	27.2
54.8	14.248	2237.02	0.188944					82.8	21.528	1854.81	0.125988	47998.5	68.8	17.888	54.8-82.8
238.7	62.062	2237.21	0.188904									48014	238.7	62.062	238.7
43.1	11.206	2237.52	0.188842									48042	43.1	11.206	43.1
39.9	10.374	2237.86	0.188775									48072	39.9	10.374	39.9
								147.2	38.272	1855.34	0.125826	48086.2	147.2	38.272	147.2
								184.6	47.996	1855.5	0.125778	48112.7	184.6	47.996	184.6
								73.5	19.11	1855.69	0.12572	48144.8	73.5	19.11	73.5
53.9	14.014	2239.78	0.188395									48241.5	53.9	14.014	53.9
30.3	7.878	2240.46	0.188263									48298	30.3	7.878	30.3
36.3	9.438	2240.89	0.188177									48334	36.3	9.438	36.3
40.9	10.634	2241.22	0.188112									48360	40.9	10.634	40.9
30.9	8.034	2241.42	0.18807									48376.5	30.9	8.034	30.9
49.5	12.87	2242.18	0.187914					42.2	10.972	1857.52	0.125163	48439	45.85	11.921	42.2-49.5
22.8	5.928	2242.33	0.187884									48451	22.8	5.928	22.8
								92.8	24.128	1857.76	0.125089	48468.9	92.8	24.128	92.8
								46.5	12.09	1858.72	0.124798	48586.2	46.5	12.09	46.5
44.7	11.622	2245.62	0.187186									48665	44.7	11.622	44.7
29.3	7.618	2245.84	0.187139									48680.5	29.3	7.618	29.3
								29.5	7.67	1859.86	0.124453	48722.6	29.5	7.67	29.5
114.6	29.796	2252.88	0.185611	204	53.04	2382.2	0.139157	176.2	45.812	1863.24	0.123435	49064	164.933	44.7	114.6-204
				61.4	15.964	2382.8	0.138952	145.4	37.804	1863.57	0.123336	49100.6	103.4	26.884	61.4-145.4
58	15.08	2255.36	0.185079	69.1	17.966	2384.2	0.138473					49200	63.55	16.523	58-69.1
68.5	17.81	2257.55	0.184601									49318	68.5	17.81	68.5
								34.7	9.022	1871.29	0.121034	49997.7	34.7	9.022	34.7
45.5	11.83	2270.83	0.181789	55	14.3	2396.5	0.134337					50176.5	50.25	13.065	45.5-55
14.7	3.822	2272.17	0.181506					64.3	16.718	1873.54	0.120368	50258.5	39.5	10.27	14.7-64.3
33.6	8.736	2273.31	0.181267									50327.5	33.6	8.736	33.6
14.4	3.744	2273.59	0.181207					72.4	18.824	1874.27	0.120151	50344.5	43.4	11.284	14.4-72.4
38.4	9.984	2274.94	0.180923									50425	38.4	9.984	38.4
								92.3	23.998	1875.95	0.119657	50526.4	92.3	23.998	92.3
21.1	5.486	2276.8	0.180528									50537	21.1	5.486	21.1
30.7	7.982	2276.92	0.180502	60.9	15.834	2401.2	0.13272					50544	45.8	11.908	30.7-60.9
100.8	26.208	2277.66	0.180345	80.8	21.008	2401.8	0.132518					50586	90.8	23.608	80.8-100.8
43.1	11.206	2279.69	0.179917									50703.5	43.1	11.206	43.1
				25.7	6.682	2403.6	0.131911					50717.6	25.7	6.682	25.7
26.5	6.89	2280.13	0.179822									50729.5	26.5	6.89	26.5
				38.6	10.036	2404.6	0.131574					50792.3	38.6	10.036	38.6
61.2	15.912	2282.95	0.179229	41.6	10.816	2406	0.131098					50897.5	51.4	13.364	41.6-61.2
33.5	8.71	2283.96	0.179016									50956.5	33.5	8.71	33.5
89.9	23.374	2286.51	0.17848					50.3	13.078	1881.24	0.118102	51103.5	70.1	18.226	50.3-89.9
24.1	6.266	2286.76	0.178426									51121	24.1	6.266	24.1		-
73.8	19.188	2286.92	0.178393					136.4	35.464	1881.47	0.118036	51130.5	105.1	27.326	73.8-136.4
				21.2	5.512	2409.4	0.129938					51149.5	21.2	5.512	21.2
				40.4	10.504	2409.81	0.129802					51178.6	40.4	10.504	40.4
12.4	3.224	2289.25	0.177906	70.9	18.434	2411	0.12939					51264.5	41.65	10.829	12.4-70.9
24.5	6.37	2289.4	0.177875					21.3	5.538	1882.78	0.117653	51273.5	22.9	5.954	21.3-24.5
				27.9	7.254	2411.8	0.129115	43.5	11.31	1883.27	0.11751	51324.7	35.7	9.282	27.9-43.5
21.6	5.616	2292.08	0.177313									51427	21.6	5.616	21.6
10.8	2.808	2292.46	0.177234	57	14.82	2413.4	0.128566					51449.5	33.9	8.814	10.8-57
				56.9	14.794	2414	0.12836					51487.5	56.9	14.794	56.9
20.1	5.226	2293.35	0.177047									51506	20.1	5.226	20.1
65	16.9	2298.04	0.176068	51.7	13.442	2417.8	0.127069	27	7.02	1887.15	0.116382	51775.5	47.9	27.9849	27-65
40.6	10.556	2298.89	0.175888									51822.5	40.6	10.556	40.6
50.9	13.234	2299.05	0.175856	96.6	25.116	2418.7	0.126798	104.7	27.222	1887.78	0.116198	51831	84.0667	22.85	50.9-104.7
28.4	7.384	2300.65	0.175519	36.3	9.438	2420.2	0.126325					51914	32.35	8.411	28.4-36.3
57	14.82	2302.77	0.175071	43	11.18	2421.6	0.125761	70.7	18.382	1889.57	0.11568	52031	56.9	7	43-70.7
				35.3	9.178	2422	0.12562	35	9.1	1889.8	0.115615	52052.8	35.15	9.139	35-35.3
				20.3	5.278	2422.8	0.125337					52112.4	20.3	5.278	20.3
24.7	6.422	2305.63	0.174466	51.6	13.416	2424	0.124914	94.9	24.674	1891.09	0.115241	52195	57.0667	13.45	24.7-94.9
343.2	89.232	2307.61	0.174047	358.6	93.236	2425.7	0.124349	177.3	46.098	1892.09	0.114951	52301.5	293.033	7.7	177.3-358.6
38	9.88	2307.91	0.173982									52317.5	38	9.88	38
27.7	7.202	2311.48	0.173232									52503.5	27.7	7.202	27.7	-
34.1	8.866	2312.23	0.173075					26.4	6.864	1894.53	0.114252	52541.5	30.25	7.865	26.4-34.1
33.4	8.684	2315.09	0.172474									52689.5	33.4	8.684	33.4
17.7	4.602	2315.35	0.172422					35.4	9.204	1896.23	0.113763	52702	26.55	6.903	17.7-35.4
								29.1	7.566	1896.59	0.113661	52741.3	29.1	7.566	29.1
25.5	6.63	2316.31	0.172221									52751.5	25.5	6.63	25.5
18.7	4.862	2317.61	0.17195	29.1	7.566	2433.4	0.121679					52816	23.9	6.214	18.7-29.1
				28.9	7.514	2433.9	0.121549					52849.9	28.9	7.514	28.9
53.7	13.962	2318.86	0.171688	35.1	9.126	2434.4	0.121354	36.5	9.49	1898.02	0.113253	52880.5	41.7667	9.3	35.1-53.7
23.6	6.136	2322.5	0.170925	105.8	27.508	2437.13	0.120498					53070.5	64.7	16.822	23.6-105.8
				32.9	8.554	2439.6	0.119661					53231.2	32.9	8.554	32.9
142.2	36.972	2326.09	0.170177	164	42.64	2440	0.119531	132.1	34.346	1901.86	0.112161	53257.5	146.1	10.9	132.1-164
33.8	8.788	2326.23	0.170146									53265.5	33.8	8.788	33.8
				27.7	7.202	2440.4	0.119401					53285.4	27.7	7.202	27.7
21	5.46	2327.37	0.169907									53322	21	5.46	21
20.4	5.304	2328.22	0.16973	25.4	6.604	2441.6	0.119011					53363.5	22.9	5.954	20.4-25.4
23.1	6.006	2329.08	0.16955	31.6	8.216	2442.2	0.118816					53405	27.35	7.111	23.1-31.6
								54.9	14.274	1903.53	0.111688	53413.2	54.9	14.274	54.9
17.3	4.498	2330.31	0.169293	25.1	6.526	2443.2	0.118491					53465	21.2	5.512	17.3-25.1
								24.2	6.292	1904.25	0.111486	53481.3	24.2	6.292	24.2
								48.6	12.636	1905.73	0.111066	53618.5	48.6	12.636	48.6
28.5	7.41	2334.12	0.168497									53651	28.5	7.41	28.5
22.4	5.824	2334.33	0.168452	110.2	28.652	2446.3	0.117451	103.4	26.884	1906.05	0.110977	53661.5	78.6667	47.523	22.4-110.2
31.7	8.242	2337.91	0.167708									53839.5	31.7	8.242	31.7
25.1	6.526	2339.07	0.167464									53892.5	25.1	6.526	25.1
29.5	7.67	2339.91	0.167287	42.5	11.05	2450.6	0.116089					53933.5	36	9.36	29.5-42.5
29.2	7.592	2340.74	0.167117									53980	29.2	7.592	29.2
80.8	21.008	2344.59	0.166325									54177	80.8	21.008	80.8
20.3	5.278	2344.96	0.166248									54193	20.3	5.278	20.3
26	6.76	2346.59	0.165921									54302	26	6.76	26
43.6	11.336	2346.65	0.16591									54306.5	43.6	11.336	43.6
27.8	7.228	2346.83	0.165874									54320.5	27.8	7.228	27.8
32.6	8.476	2347.25	0.165796									54351	32.6	8.476	32.6
								62.9	16.354	1913.14	0.108994	54370	62.9	16.354	62.9
126.5	32.89	2347.72	0.165706									54388.5	126.5	32.89	126.5
107.5	27.95	2348.71	0.165523	159.3	41.418	2457	0.11402					54475.5	133.4	34.684	107.5-159.3
22	5.72	2348.9	0.165487									54491.5	22	5.72	22
98.1	25.506	2350.05	0.165275									54594.5	98.1	25.506	98.1
39.4	10.244	2350.8	0.165136									54659.5	39.4	10.244	39.4
26.1	6.786	2351.01	0.165098					49.5	12.87	1915.12	0.108443	54677.5	37.8	9.828	26.1-49.5
								27.4	7.124	1915.24	0.108409	54697.5	27.4	7.124	27.4
69.5	18.07	2352.09	0.164892					158.1	41.106	1915.68	0.108286	54776.5	113.8	29.588	69.5-158.1
32.7	8.502	2352.2	0.164873									54784.5	32.7	8.502	32.7
20.1	5.226	2355.38	0.164245									55003	20.1	5.226	20.1
64.2	16.692	2356.56	0.164013									55107	64.2	16.692	64.2
103.2	26.832	2357.09	0.163914									55159	103.2	26.832	103.2
21.1	5.486	2357.72	0.163798									55218.5	21.1	5.486	21.1
								135.5	35.23	1919.15	0.107326	55259.2	135.5	35.23	135.5
866.2	225.212	2359.44	0.163477	1435.6	373.256	2464.2	0.1117	1050.4	273.104	1919.83	0.10714	55382.5	1117.4	284.7	866.2-1435.6
14.9	3.874	2361.36	0.1631	38.6	10.036	2465.6	0.11125	87.8	22.828	1920.94	0.10683	55508	47.1	11.85	14.9-87.8
				25	6.5	2466	0.111121	20.6	5.356	1921.2	0.106758	55540.1	22.8	5.928	20.6-25
11.5	2.99	2362.27	0.162914					53.3	13.858	1921.37	0.10671	55561	32.4	8.424	11.5-53.3
17.9	4.654	2362.44	0.16288	41.7	10.842	2466.4	0.110993					55572	29.8	7.748	17.9-41.7
								26.1	6.786	1922.22	0.106476	55657.2	26.1	6.786	26.1
								88.2	22.932	1925.84	0.10549	56207.5	88.2	22.932	88.2
24.7	6.422	2371.17	0.161203	201.8	52.468	2472.6	0.109003					56230.5	113.25	29.445	24.7-201.8
27.2	7.072	2372.7	0.160921									56364.5	27.2	7.072	27.2
30.9	8.034	2373.39	0.160792									56421	30.9	8.034	30.9
21.4	5.564	2374.28	0.160626									56489	21.4	5.564	21.4
30.4	7.904	2374.32	0.160618									56492.5	30.4	7.904	30.4
25.7	6.682	2375.3	0.160433									56565.5	25.7	6.682	25.7
								27.2	7.072	1929.89	0.10438	56770.2	27.2	7.072	27.2
								22.6	5.876	1930.77	0.104144	56878.8	22.6	5.876	22.6
				40.3	10.478	2479.8	0.106702					57002.3	40.3	10.478	40.3
60.4	15.704	2382.65	0.158999	78.8	20.488	2480.2	0.106575					57050.5	69.6	18.096	60.4-78.8
27.3	7.098	2382.78	0.158976									57058.5	27.3	7.098	27.3
32.8	8.528	2382.92	0.158949									57067.5	32.8	8.528	32.8
29.6	7.696	2383.31	0.158874									57092.5	29.6	7.696	29.6
34.1	8.866	2384.22	0.158697	101.1	26.286	2481.4	0.106194					57151	67.6	17.576	34.1-101.1
37	9.62	2384.42	0.158659									57166	37	9.62	37
55.4	14.404	2384.56	0.158631					185.4	48.204	1933.09	0.103516	57176.5	120.4	31.304	55.4-185.4
10.1	2.626	2385.14	0.158519					95.2	24.752	1933.36	0.103443	57214	52.65	13.689	10.1-95.2
70.5	18.33	2385.22	0.158503									57219.5	70.5	18.33	70.5
								65.5	17.03	1933.56	0.103389	57231.8	65.5	17.03	65.5
63.6	16.536	2385.54	0.158441									57240	63.6	16.536	63.6
47.2	12.272	2389.49	0.157668	57.1	14.846	2484.99	0.105059	63	16.38	1935.62	0.102833	57498	55.7667	4.95	47.2-63
								26.4	6.864	1935.82	0.10278	57520.3	26.4	6.864	26.4
39.4	10.244	2390.5	0.157468									57564.5	39.4	10.244	39.4
23.4	6.084	2391.79	0.157213									57639.5	23.4	6.084	23.4
20.6	5.356	2392.25	0.157122					24.7	6.422	1937.03	0.102454	57665	22.65	5.889	20.6-24.7
				62.3	16.198	2488.2	0.104037					57752.7	62.3	16.198	62.3
43.6	11.336	2393.85	0.156804									57763	43.6	11.336	43.6
44.4	11.544	2395.85	0.156407									57867.5	44.4	11.544	44.4
38.9	10.114	2396.12	0.156353									57881	38.9	10.114	38.9
41.1	10.686	2398.34	0.155915									58017	41.1	10.686	41.1
44.8	11.648	2399.45	0.155698	230.9	60.034	2492.4	0.102701					58090	137.85	35.841	44.8-230.9
156.9	40.794	2400.68	0.155464									58180.5	156.9	40.794	156.9
26.6	6.916	2401.35	0.155335									58215	26.6	6.916	26.6
26.9	6.994	2402.27	0.155156									58259	26.9	6.994	26.9
60	15.6	2402.96	0.155021									58306.5	60	15.6	60
24.7	6.422	2403.01	0.155012									58310	24.7	6.422	24.7
30.6	7.956	2403.54	0.154912									58351	30.6	7.956	30.6
90.8	23.608	2403.59	0.154903									58354.5	90.8	23.608	90.8
26	6.76	2403.78	0.154866									58369.5	26	6.76	26
38.3	9.958	2404.2	0.15479	22.8	5.928	2495.6	0.101679					58404.5	30.55	7.943	22.8-38.3
22.7	5.902	2404.27	0.154777									58411	22.7	5.902	22.7
26.1	6.786	2404.85	0.154673									58461	26.1	6.786	26.1
55.9	14.534	2405.27	0.154597									58499.5	55.9	14.534	55.9
26.6	6.916	2405.9	0.154484									58551.5	26.6	6.916	26.6
58.8	15.288	2406.73	0.15433					46.8	12.168	1944.36	0.100497	58607	52.8	13.728	46.8-58.8
93.8	24.388	2406.91	0.154297									58618.5	93.8	24.388	93.8
25.8	6.708	2408.07	0.154075									58685	25.8	6.708	25.8
43.4	11.284	2409.02	0.153888									58734.5	43.4	11.284	43.4
15.3	3.978	2409.89	0.15372					267.1	69.446	1946.12	0.100031	58787	141.2	36.712	15.3-267.1
				76.2	19.812	2500.4	0.10015					58863.2	76.2	19.812	76.2
32.3	8.398	2411.28	0.153452									58878	32.3	8.398	32.3
				21.6	5.616	2502.2	0.0995551					59007.1	21.6	5.616	21.6
								160.4	41.704	1948.9	0.0992997	59135.2	160.4	41.704	160.4
26	6.76	2415.9	0.15255									59149	26	6.76	26
38.2	9.932	2416.56	0.152429									59206.5	38.2	9.932	38.2
27.6	7.176	2416.71	0.152403									59218.5	27.6	7.176	27.6
27.4	7.124	2417.44	0.152272									59283.5	27.4	7.124	27.4
33.3	8.658	2417.9	0.152188									59316	33.3	8.658	33.3
74.6	19.396	2421.72	0.151456	127	33.02	2507.6	0.0978048					59544.5	100.8	26.208	74.6-127
129	33.54	2422.79	0.15127									59644	129	33.54	129
				109	28.34	2508.8	0.0974238	224.3	58.318	1952.68	0.0983078	59703.1	166.65	43.329	109-224.3
42.7	11.102	2423.63	0.151126									59720.5	42.7	11.102	42.7
22.2	5.772	2424.59	0.150962									59806.5	22.2	5.772	22.2
36.9	9.594	2424.82	0.150923									59827.5	36.9	9.594	36.9
21.7	5.642	2425.46	0.15081									59890.5	21.7	5.642	21.7

## Sheet: Table S4
WDC				EDC				EDML				Age (b2k)	Average deposition (kg km-2)	1δ	Deposition (min-max. kg km-2)
Deposition (kg km-2)	1δ	Depth (m)	Thinning	Deposition (kg km-2)	1δ	Depth (m)	Thinning	Deposition (kg km-2)	1δ	Depth (m)	Thinning
10.7	2.7	1689.93	0.604819					12.9	5.16	559.267	0.754551	9035.89	11.216	4.4864	10.7-12.9
30.3	7.6	1702.97	0.601275					11	4.4	565.032	0.748053	9166.25	17.0815	6.8326	11.0-30.3
				13.2	5.28	283.159	0.935584					9171.48	18.348	7.3392	13.2046
19.6	4.9	1704.62	0.600812									9180.71	13.916	3.479	19.5548
22.8	5.7	1732.97	0.592717					10.5	4.2	578.314	0.733069	9460.99	14.1315	5.6526	10.5-22.8
17.9	4.5	1742.8	0.589976					11.3	4.52	582.638	0.728305	9557.72	12.852	5.1408	11.3-17.9
				10.1	4.04	294.166	0.934942					9563.32	14.039	5.6156	10.0721
15.4	3.8	1744.24	0.589575									9570.82	10.934	2.698	15.3514
24.7	6.2	1767.87	0.582547					15.2	6.08	593.308	0.713222	9787.02	17.5085	7.0034	15.2-24.7
17.8	4.4	1772.35	0.581146									9830.3	12.638	3.124	17.7573
17.7	4.4	1775.4	0.580191									9861.62	12.567	3.124	17.7354
61.5	15.4	1779.45	0.578928					76.6	30.64	598.311	0.705686	9898.59	65.8775	26.351	61.5-76.6
				15.7	6.28	304.439	0.935528					9904.66	21.823	8.7292	15.6809
19.3	4.8	1784.03	0.577438	20.8	8.32	305.668	0.935684	19.4	7.76	600.378	0.702814	9944.07	19.8333	7.62649	19.3-20.8
								10.2	4.08	606.326	0.694341	10081.8	11.73	4.692	10.2374
14.7	3.7	1799.18	0.572417									10095.7	10.437	2.627	14.7077
11.2	2.8	1802.65	0.571277					14.8	5.92	608.391	0.692054	10131.1	12.486	4.9944	11.2-14.8
90	22.5	1808.89	0.569223	36.2	14.48	312.875	0.93534	75.5	30.2	611.232	0.688945	10194.9	67.2333	18.4517	36.2-90.0
99	24.7	1812.26	0.568099									10229.9	70.29	17.537	98.9761
13.5	3.4	1824.26	0.564055					15.1	6.04	618.094	0.683408	10355.1	13.475	5.39	13.5-15.1
				10.7	4.28	317.515	0.935126					10363.9	14.873	5.9492	10.668
11.2	2.8	1833.09	0.56098					19.1	7.64	622.086	0.68151	10449.8	14.9585	5.9834	11.2-19.1
79.9	20	1836.32	0.55996	10.9	4.36	321.138	0.935324	79	31.6	623.486	0.681076	10483.4	56.6	37.9107	10.9-79.9
28.9	7.2	1839.48	0.559151	20.6	8.24	322.03	0.935236	24.1	9.64	624.909	0.680429	10514.1	24.5333	4.44373	20.6-28.9
17.2	4.3	1840.9	0.55879									10528.6	12.212	3.053	17.1914
14.7	3.7	1844.11	0.55798									10558.7	10.437	2.627	14.6555
15	3.8	1850.3	0.556268					21.4	8.56	629.88	0.678916	10624	17.63	7.052	15.0-21.4
				11.2	4.48	325.305	0.935616					10629.1	15.568	6.2272	11.2478
16.1	4	1873.16	0.548533									10854.3	11.431	2.84	16.0947
156.6	39.1	1896.6	0.540872					60	24	650.238	0.690023	11104.4	90.093	36.0372	60.0-156.6
				10.2	4.08	338.659	0.932994					11108.1	14.178	5.6712	10.1709
18	4.5	1899.24	0.54002					21	8.4	651.306	0.691235	11128.1	18.465	7.386	18.0-21.0
								15.5	6.2	655.871	0.696696	11230.6	17.825	7.13	15.4696
34.4	8.6	1911.26	0.536748	14	5.6	342.809	0.931797	28.5	11.4	656.357	0.697217	11241.9	25.6333	6.72891	14.0-34.4
19.5	4.9	1914.64	0.535926	10.3	4.12	343.72	0.931241	11.6	4.64	657.705	0.698633	11270.9	13.8	0.488593	10.3-19.5
77.1	19.3	1917.51	0.535225					14.3	5.72	658.862	0.699932	11293.1	35.593	14.2372	14.3-77.1
64.2	16	1918.3	0.534981					31.2	12.48	659.114	0.70022	11298.7	40.731	16.2924	31.2-64.2
42.8	10.7	1919.11	0.534726	27.3	10.92	344.856	0.931163	20.1	8.04	659.503	0.700665	11306	30.0667	7.41646	20.1-42.8
16.5	4.1	1920.72	0.534212									11320.2	11.715	2.911	16.4747
18	4.5	1924.66	0.532968									11353.8	12.78	3.195	18.0297
17.7	4.4	1932.82	0.53034									11422.5	12.567	3.124	17.6808
54.4	13.6	1937.74	0.52848					29.6	11.84	667.026	0.708014	11471.5	36.332	14.5328	29.6-54.4
24.7	6.2	1940.22	0.527542					18	7.2	668.077	0.708941	11487.3	19.1185	7.6474	18.0-24.7
52.5	13.1	1948.46	0.524574									11531.9	37.275	9.301	52.4958
32.2	8	1949.24	0.524363	53.6	21.44	353.054	0.927973					11536.2	48.683	19.4732	32.2-53.6
14.4	3.6	1965.49	0.519779									11619.4	10.224	2.55368	14.3869
16.1	4	1997.08	0.509314									11947.3	11.431	2.83756	16.0862
18.5	4.6	2012.54	0.50435									12169.3	13.135	3.26768	18.5095
35.4	8.9	2019.04	0.502494					22.2	8.88	703.33	0.721908	12239.3	25.332	10.1328	22.2-35.4
18	4.5	2019.66	0.502316					10.7	4.28	703.653	0.721875	12246.6	12.5425	5.017	10.7-18.0
43.1	10.8	2037.12	0.496585					22.7	9.08	712.205	0.722227	12441.4	28.353	11.3412	22.7-43.1
18.9	4.7	2047.1	0.49349									12538.5	13.419	3.337	18.9
27	6.8	2052.36	0.491973									12594.5	19.17	4.828	27
17.3	4.3	2060.43	0.488979									12681	12.283	3.053	17.3
24.7	6.2	2068.26	0.486399					14.4	5.76	725.803	0.722591	12753.5	17.0485	6.8194	14.4-24.7
105.9	26.5	2082.88	0.481719	36.3	14.52	387.399	0.920865	35.8	14.32	731.45	0.721916	12917.2	59.3333	17.5841	35.8-105.9
30.8	7.7	2086.42	0.480438									12961	21.868	5.467	30.8
57.1	14.3	2089.64	0.479282					22.7	9.08	733.652	0.721522	12995	33.323	13.3292	22.7-57.1
79.9	20	2092.64	0.478235	81.9	32.76	389.487	0.920735	33.3	13.32	734.74	0.721305	13026.4	65.0333	39.3886	33.3-81.9
18.9	4.7	2102.42	0.474856									13119.5	13.419	3.337	18.9
21.3	5.3	2104.97	0.474189									13146	15.123	3.763	21.3
14.9	3.7	2105.53	0.474041									13152	10.579	2.627	14.9
71.8	18	2111.16	0.47256	28.9	11.56	393.2	0.920746	19.6	7.84	741.214	0.720076	13211.3	40.1	14.3548	19.6-71.8
14.2	3.6	2131.79	0.465269									13472	10.082	2.556	14.2
50.2	12.6	2133.54	0.464601					32.3	12.92	750.197	0.718437	13492.1	36.3935	14.5574	32.3-50.2
17.8	4.5	2144.72	0.460915									13621.5	12.638	3.195	17.8
76.9	19.2	2145.25	0.460764					30.4	12.16	754.718	0.717993	13629.4	44.7795	17.9118	30.4-76.9
18.1	4.5	2148.1	0.459972									13662.5	12.851	3.195	18.1
18.9	4.7	2149.78	0.459499									13682.5	13.419	3.337	18.9
31.4	7.9	2155.52	0.457505									13743	22.294	5.609	31.4
14.5	3.6	2161.41	0.455334									13805.5	10.295	2.556	14.5
56.8	14.2	2164.03	0.454362	37.3	14.92	404.298	0.921253	32.8	13.12	761.698	0.71868	13833.4	42.3	7.51733	32.8-56.8
65.7	16.4	2169.95	0.452174									13896	46.647	11.644	65.7
22.5	5.6	2179.74	0.44844					18	7.2	767.856	0.718449	14018.4	18.3375	7.335	18.0-22.5
18	4.5	2196.27	0.44273					14.2	5.68	774.87	0.711593	14237.1	14.555	5.822	14.2-18.0
18.6	4.7	2212.99	0.436469									14423	13.206	3.337	18.6
52.5	13.1	2219.78	0.433884					39.4	15.76	784.889	0.703944	14499	41.2925	16.517	39.4-52.5
28.7	7.2	2230.91	0.429608	15.9	6.36	419.803	0.921786					14596	21.239	8.4956	15.9-28.7
73.6	18.4	2240.1	0.426681					35.2	14.08	793.203	0.699733	14703.6	46.368	18.5472	35.2-73.6
16.3	4.1	2242.97	0.425863					11.8	4.72	794.551	0.699065	14737.4	12.5715	5.0286	11.8-16.3
15.6	3.9	2245.09	0.425263					13.2	5.28	795.512	0.698591	14760.8	13.128	5.2512	13.2-15.6
27.3	6.8	2253.34	0.422838					11.7	4.68	799.202	0.696766	14844.5	16.419	6.5676	11.7-27.3
20.1	5	2254.86	0.422387									14857.5	14.271	3.55	20.1
25.2	6.3	2257.12	0.421718					15.8	6.32	800.845	0.695925	14884.7	18.031	7.2124	15.8-25.2
15.2	3.8	2258.27	0.421448	10.9	4.36	426.104	0.918442	11.5	4.6	801.462	0.6956	14900.5	12.5333	2.18441	10.9-15.2
98.3	24.6	2263.11	0.420494					47.4	18.96	803.889	0.694319	14966.7	62.1515	24.8606	47.4-98.3
82.3	20.6	2266.09	0.419905	17.5	7	428.01	0.917342	40.3	16.12	805.308	0.693549	15000.9	46.7	17.2933	17.5-82.3
58.5	14.6	2267.45	0.419636	20.3	8.12	428.293	0.917192	32.7	13.08	806.005	0.693159	15018.2	37.1667	6.84286	20.3-58.5
56.7	14.2	2271.74	0.418489					219.7	87.88	808.245	0.691896	15079.2	146.456	58.5824	56.7-219.7
								12.9	5.16	809.78	0.690926	15121	14.835	5.934	12.9
24.9	6.2	2276.39	0.417057	12.5	5	430.553	0.91579					15141.5	17.527	7.0108	12.5-24.9
30.6	7.7	2279.41	0.416129					12.1	4.84	812.123	0.689309	15186.6	17.8205	7.1282	12.1-30.6
46.2	11.6	2282.75	0.415084	36.6	14.64	432.161	0.915017	45.9	18.36	813.752	0.688094	15231.5	42.9	11.027	36.6-46.2
17.5	4.4	2283.08	0.414979									15235	12.425	3.124	17.5
22.5	5.6	2288.3	0.413349									15295.5	15.975	3.976	22.5
27.2	6.8	2290.15	0.41277					16.4	6.56	817.251	0.685228	15321	19.086	7.6344	16.4-27.2
32.9	8.2	2291.4	0.412417									15336.5	23.359	5.822	32.9
107.7	26.9	2308.63	0.406799	79.1	31.64	438.267	0.911999	29.3	11.72	825.981	0.677008	15558.3	72.0333	38.2212	29.3-107.7
18.2	4.6	2314.82	0.404091					10.2	4.08	829.141	0.677691	15649.8	12.326	4.9304	10.2-18.2
								12.6	5.04	832.57	0.678229	15749.1	14.49	5.796	12.6
11.3	2.8	2336.42	0.402324					10.8	4.32	840.462	0.678293	15959.7	10.2215	4.0886	10.8-11.3
								13.9	5.56	844.43	0.677998	16061.1	15.985	6.394	13.9
37.8	9.5	2345.02	0.401068					27.5	11	845.324	0.678087	16084.8	29.2315	11.6926	27.5-37.8
15.6	3.9	2346.2	0.400545									16104	11.076	2.769	15.6
21.6	5.4	2348.97	0.40065					25.3	10.12	847.654	0.678275	16148.8	22.2155	8.8862	21.6-25.3
15	3.8	2349.24	0.398888									16152	10.65	2.698	15
17.9	4.5	2353.25	0.400293									16211.5	12.709	3.195	17.9
64.2	16.1	2357.4	0.398343	14.8	5.92	450.683	0.905621	35.7	14.28	852.359	0.678542	16276.4	38.2333	13.3263	14.8-64.2
46.8	11.7	2361.09	0.393665	42.3	16.92	451.699	0.905178	28.6	11.44	854.411	0.678607	16333.6	39.2333	14.8608	28.6-46.8
14.1	3.5	2361.33	0.394794					13.6	5.44	854.558	0.67861	16337.9	12.8255	5.1302	13.6-14.1
37.5	9.4	2367.31	0.394912					27.8	11.12	858.124	0.678604	16429.7	29.2975	11.719	27.8-37.5
65.9	16.5	2369.99	0.394602	95.8	38.32	454.185	0.904004	104.5	41.8	859.633	0.678438	16469.2	88.7333	46.5734	65.9-104.5
								10.2	4.08	861.15	0.678041	16527.7	11.73	4.692	10.2
13.4	3.4	2381.54	0.391675					10.3	4.12	866.38	0.676563	16725.4	10.6795	4.2718	10.3-13.4
25.2	6.3	2392.31	0.389309					30.6	12.24	873.066	0.675175	16985.1	26.541	10.6164	25.2-30.6
								10.7	4.28	878.83	0.6742	17197.3	12.305	4.922	10.7
								18.8	7.52	879.857	0.674018	17234.3	21.62	8.648	18.8
								16.8	6.72	880.055	0.673986	17241.6	19.32	7.728	16.8
14.3	3.6	2405.46	0.395352									17332.5	10.153	2.556	14.3
								11.7	4.68	882.811	0.673651	17355.7	13.455	5.382	11.7
				13.4	5.36	471.461	0.895492					17827.9	18.626	7.4504	13.4
								21.5	8.6	896.742	0.670849	17892.4	24.725	9.89	21.5
15.7	3.9	2426.03	0.383705									17927.5	11.147	2.769	15.7
								18.9	7.56	898.178	0.67056	17945.6	21.735	8.694	18.9
27.5	6.9	2430.25	0.383386									18054.5	19.525	4.899	27.5
								28.1	11.24	901.355	0.669938	18075.4	32.315	12.926	28.1
								11.1	4.44	902.111	0.669788	18105.8	12.765	5.106	11.1
26.7	6.7	2433.95	0.380414									18161	18.957	4.757	26.7
27.2	6.8	2435.57	0.375977									18204	19.312	4.828	27.2
								14.5	5.8	905.101	0.667972	18212.1	16.675	6.67	14.5
16.4	4.1	2436.27	0.380941									18223	11.644	2.911	16.4
22.8	5.7	2437.61	0.382067									18262.5	16.188	4.047	22.8
								23.1	9.24	906.644	0.666265	18272.7	26.565	10.626	23.1
				11.3	4.52	479.115	0.890774					18446.2	15.707	6.2828	11.3
23.6	5.9	2444.67	0.377556					14.5	5.8	911.723	0.660825	18476.4	16.7155	6.6862	14.5-23.6
								11.4	4.56	911.887	0.660638	18483	13.11	5.244	11.4
13.5	3.4	2445.28	0.377824					26.6	10.64	912.168	0.660315	18494.3	20.0875	8.035	13.5-26.6
32.2	8.1	2449.11	0.383758									18609	22.862	5.751	32.2
15.8	4	2450.28	0.376203									18643	11.218	2.84	15.8
74.7	18.7	2451.01	0.373521	25.8	10.32	481.735	0.889311	98.9	39.56	916.582	0.655333	18665.4	66.4667	40.9134	25.8-98.9
23.9	6	2452.89	0.377973									18724.5	16.969	4.26	23.9
15.8	4	2455.06	0.369798	15.2	6.08	483.401	0.888295	28.9	11.56	919.701	0.652313	18784.8	19.9667	11.0268	15.2-28.9
								30.7	12.28	921.375	0.651586	18846.4	35.305	14.122	30.7
12.1	3	2462.03	0.37306					30.7	12.28	925.1	0.650008	18994.3	21.948	8.7792	12.1-30.7
								42.8	17.12	925.94	0.649636	19028.9	49.22	19.688	42.8
								11	4.4	927.231	0.649054	19079.4	12.65	5.06	11
12.8	3.2	2468.92	0.372161					20.7	8.28	930.236	0.647731	19197.4	16.4465	6.5786	12.8-20.7
18.7	4.7	2469.26	0.374466					17.4	6.96	930.49	0.647621	19208.6	16.6435	6.6574	17.4-18.7
27.8	7	2478.15	0.374213									19449.5	19.738	4.97	27.8
35.6	8.9	2478.39	0.367149	65	26	492.664	0.883712	10.9	4.36	936.696	0.645096	19456.4	37.1667	41.7375	10.9-65.0
63	15.8	2482.73	0.3661					126.6	50.64	939.692	0.643963	19569.9	95.16	38.064	63.0-126.6
155.5	38.9	2484.18	0.368912	111.2	44.48	494.846	0.882705	113.2	45.28	940.738	0.643598	19610.2	126.633	22.1216	111.2-155.5
				14.6	5.84	496.374	0.882039					19743.6	20.294	8.1176	14.6
30.3	7.6	2490.5	0.365613									19783.5	21.513	5.396	30.3
								14.4	5.76	945.339	0.64203	19803.3	16.56	6.624	14.4
								12.5	5	946.734	0.6416	19857.1	14.375	5.75	12.5
								20.9	8.36	947.585	0.641318	19889.4	24.035	9.614	20.9
59.3	14.8	2497.09	0.361136	12	4.8	499.413	0.880637	41.9	16.76	949.166	0.640792	19951.7	37.7333	16.7127	12.0-59.3
								22.6	9.04	952.224	0.639736	20075	25.99	10.396	22.6
				18.4	7.36	501.278	0.879726					20083.9	25.576	10.2304	18.4
16.6	4.2	2503.08	0.359692									20109	11.786	2.982	16.6
16.9	4.2	2503.35	0.359617	13.1	5.24	501.696	0.879531	26.7	10.68	953.199	0.639371	20116.4	18.9	9.5274	13.1-26.7
13.4	3.4	2504.22	0.358404					11.6	4.64	953.792	0.639145	20140.6	11.427	4.5708	11.6-13.4
16.6	4.2	2505.01	0.35916					21.8	8.72	954.25	0.638965	20158.6	18.428	7.3712	16.6-21.8
28.2	7.1	2505.94	0.357911					16.1	6.44	954.935	0.638698	20185.4	19.2685	7.7074	16.1-28.2
79.7	19.9	2506.3	0.362129	10.4	4.16	502.72	0.879146	34.4	13.76	955.199	0.6386	20195.1	41.5	21.1941	10.4-79.7
80.2	20.1	2506.93	0.358994	12.8	5.12	502.964	0.879054	51	20.4	955.588	0.63846	20208.8	48	23.1121	12.8-80.2
84.1	21	2507.7	0.357027					29.6	11.84	956.093	0.638278	20227.1	46.8755	18.7502	29.6-84.1
40.8	10.2	2511.18	0.354196	13.1	5.24	504.566	0.878427	32.1	12.84	958.323	0.637482	20310.2	28.6667	9.38816	13.1-40.8
				33.4	13.36	506.209	0.877655					20422.3	46.426	18.5704	33.4
16	4	2515.86	0.355145					10.8	4.32	961.366	0.636426	20435.8	11.89	4.756	10.8-16.0
				14.8	5.92	506.499	0.877513					20444	20.572	8.2288	14.8
21.2	5.3	2516.47	0.355357									20450.5	15.052	3.763	21.2
41.2	10.3	2517.25	0.358596									20469.5	29.252	7.313	41.2
17.3	4.3	2519.87	0.354455					15.9	6.36	963.913	0.635549	20539	15.284	6.1136	15.9-17.3
				16.3	6.52	508.214	0.876749					20561.1	22.657	9.0628	16.3
18.4	4.6	2524.71	0.356615									20660	13.064	3.266	18.4
				29	11.6	510.325	0.875732					20712.5	40.31	16.124	29
63.2	15.8	2526.97	0.352461									20729	44.872	11.218	63.2
29.8	7.5	2527.31	0.345176					28.1	11.24	968.87	0.634829	20739	26.7365	10.6946	28.1-29.8
33.5	8.4	2530.11	0.351449	14	5.6	511.713	0.875185	30.5	12.2	970.812	0.634656	20817.8	26	8.06224	14.0-33.5
28.5	7.1	2532.88	0.34396	23.2	9.28	512.732	0.874658	20.9	8.36	972.711	0.634449	20900.8	24.2	6.14011	20.9-28.5
51.7	12.9	2538.36	0.340102	10.2	4.08	515.002	0.873702	24.6	9.84	976.453	0.634475	21070	28.8333	11.3838	10.2-51.7
								12.6	5.04	980.086	0.634424	21235.5	14.49	5.796	12.6
25.8	6.5	2545.77	0.347055	70	28	517.647	0.872582					21316	57.809	23.1236	25.8-70.0
				20	8	519.221	0.871884					21419.4	27.8	11.12	20
13.6	3.4	2549.62	0.340623					16.1	6.44	984.662	0.633952	21444.8	14.0855	5.6342	13.6-16.1
				11.1	4.44	519.999	0.871549					21477.2	15.429	6.1716	11.1
47.7	11.9	2554.44	0.343704					20.8	8.32	988.322	0.633998	21614.4	28.8935	11.5574	20.8-47.7
14.2	3.6	2555.35	0.342756									21643	10.082	2.556	14.2
27.6	6.9	2561.58	0.341091									21862.5	19.596	4.899	27.6
								14	5.6	996.605	0.632796	21999.5	16.1	6.44	14
24.6	6.2	2567.24	0.346001									22060.5	17.466	4.402	24.6
24.1	6	2568.89	0.338993									22120	17.111	4.26	24.1
20.8	5.2	2570.35	0.335308									22171.5	14.768	3.692	20.8
39.6	9.9	2572.09	0.332842					24.3	9.72	1001.41	0.630764	22230.9	28.0305	11.2122	24.3-39.6
15.6	3.9	2572.65	0.337225									22251	11.076	2.769	15.6
37.8	9.5	2574.06	0.332014					34.8	13.92	1002.92	0.630133	22304.6	33.429	13.3716	34.8-37.8
14.5	3.6	2575.2	0.336448					17.7	7.08	1003.77	0.629759	22344	15.325	6.13	14.5-17.7
								12.3	4.92	1004.59	0.629396	22382.3	14.145	5.658	12.3
								12.8	5.12	1004.88	0.629259	22394.9	14.72	5.888	12.8
20	5	2581.9	0.33649	21.1	8.44	532.535	0.866145	22.2	8.88	1008.78	0.627875	22565.6	21.1	7.8707	20.0-22.2
								18.7	7.48	1011.58	0.62714	22692.9	21.505	8.602	18.7
				12.3	4.92	534.122	0.865418					22706.2	17.097	6.8388	12.3
20.8	5.2	2586.45	0.332267					24.6	9.84	1012.56	0.626912	22735.9	21.529	8.6116	20.8-24.6
				15	6	535.284	0.864911					22798.8	20.85	8.34	15
13.3	3.3	2590.29	0.331784					11.2	4.48	1015.71	0.626133	22875.9	11.1615	4.4646	11.2-13.3
13.9	3.5	2592.33	0.331182					23.1	9.24	1017.44	0.625825	22948.4	18.217	7.2868	13.9-23.1
32.3	8.1	2594.58	0.330522					25.4	10.16	1019.27	0.625705	23020.9	26.0715	10.4286	25.4-32.3
25	6.3	2600.42	0.325588	11.7	4.68	540.559	0.862907	41.6	16.64	1024.18	0.625227	23236.8	26.1	17.8172	11.7-41.6
								15.7	6.28	1024.74	0.625164	23257.7	18.055	7.222	15.7
35.6	8.9	2602.9	0.321156	12.8	5.12	541.654	0.862398	78.1	31.24	1026.43	0.625021	23318.7	42.1667	39.5993	12.8-78.1
36.5	9.1	2604.16	0.326537	27.2	10.88	542.176	0.86215	13.6	5.44	1027.58	0.624957	23356.3	25.7667	11.0938	13.6-36.5
23	5.8	2605.22	0.32511					37.2	14.88	1028.54	0.624904	23397.7	29.555	11.822	23.0-37.2
89.2	22.3	2610.97	0.323728					67.8	27.12	1033.5	0.624107	23646.1	70.651	28.2604	67.8-89.2
51.6	12.9	2615.07	0.324216					36.7	14.68	1037.15	0.623804	23847.5	39.4205	15.7682	36.7-51.6
								10.6	4.24	1038.17	0.623559	23904.4	12.19	4.876	10.6
								18.3	7.32	1038.65	0.623418	23931.6	21.045	8.418	18.3
34.8	8.7	2617.3	0.326383	26.6	10.64	547.592	0.859989	16.2	6.48	1038.98	0.62332	23951	25.8667	9.34433	16.2-34.8
								16.3	6.52	1039.21	0.623279	23964.4	18.745	7.498	16.3
24.6	6.2	2619.72	0.32224					11.3	4.52	1041.05	0.62302	24073.5	15.2305	6.0922	11.3-24.6
28	7	2621.16	0.315024					10.6	4.24	1042.11	0.622903	24133	16.035	6.414	10.6-28.0
23.6	5.9	2626.08	0.316784	16.1	6.44	550.774	0.858703					24338.5	19.5675	7.827	16.1-23.6
15.3	3.8	2628.01	0.318114									24409.5	10.863	2.698	15.3
21.4	5.4	2631.18	0.315565					22.8	9.12	1049.49	0.618991	24531.9	20.707	8.2828	21.4-22.8
16.4	4.1	2631.86	0.312828									24564.5	11.644	2.911	16.4
48.5	12.1	2633.65	0.317789	13.6	5.44	553.333	0.857609	45.4	18.16	1051.33	0.618541	24640.7	35.8333	16.6656	13.6-48.5
96.3	24.1	2634.24	0.317033	20.7	8.28	553.587	0.857478	71.4	28.56	1051.81	0.618374	24668.3	62.8	27.6939	20.7-96.3
49.2	12.3	2634.62	0.315454					34.5	13.8	1052.07	0.61828	24681.1	37.3035	14.9214	34.5-49.2
								15.9	6.36	1053.9	0.617479	24763.3	18.285	7.314	15.9
14.6	3.7	2642.17	0.313844									24912.5	10.366	2.627	14.6
33.4	8.4	2642.41	0.314921					40.2	16.08	1057.38	0.616378	24917	34.972	13.9888	33.4-40.2
								12.8	5.12	1058.58	0.615796	24967.6	14.72	5.888	12.8
								12.6	5.04	1058.81	0.615712	24977.6	14.49	5.796	12.6
								27.4	10.96	1059.05	0.615626	24988.4	31.51	12.604	27.4
29	7.3	2647.76	0.312232					25.7	10.28	1061.17	0.614947	25074.4	25.0725	10.029	25.7-29.0
								13.9	5.56	1061.27	0.61492	25078.4	15.985	6.394	13.9
38.1	9.5	2648.05	0.312378	10.6	4.24	557.907	0.855704	15.5	6.2	1061.34	0.614897	25081.7	21.4	6.40809	10.6-38.1
15.1	3.8	2649.76	0.308007									25133	10.721	2.698	15.1
19.3	4.8	2651.72	0.312966	11	4.4	559.091	0.855226	17.8	7.12	1063.87	0.613525	25192.9	16.0333	3.53891	11.0-19.3
34.1	8.5	2652.99	0.311138					20.3	8.12	1064.76	0.612941	25234.7	23.778	9.5112	20.3-34.1
								12.4	4.96	1065.6	0.612529	25274.5	14.26	5.704	12.4
51.9	13	2654.85	0.307822					16.6	6.64	1066.02	0.612327	25294.5	27.9695	11.1878	16.6-51.9
36.2	9.1	2655.99	0.310403	22.4	8.96	560.299	0.854724	25	10	1066.75	0.612067	25329.2	27.8667	2.72371	22.4-36.2
								12.5	5	1067.49	0.611809	25360.1	14.375	5.75	12.5
370.1	92.5	2660.2	0.300217	7.2	2.88	561.58	0.85	265.7	106.28	1069.71	0.610704	25459.7	214.333	159.722	7.2-370.1
28.6	7.2	2661.12	0.308016					10.5	4.2	1070.34	0.610257	25486.1	16.1905	6.4762	10.5-28.6
								12.2	4.88	1070.89	0.609884	25509.3	14.03	5.612	12.2
24.8	6.2	2662.74	0.307565									25536.5	17.608	4.402	24.8
23.9	6	2664.14	0.307201					23.9	9.56	1072.51	0.608902	25577.2	22.227	8.8908	23.9
								10.7	4.28	1074.64	0.607703	25663.7	12.305	4.922	10.7
33.2	8.3	2668.38	0.306096									25706.5	23.572	5.893	33.2
								14.8	5.92	1076.26	0.606875	25731.9	17.02	6.808	14.8
162.1	40.5	2670.06	0.302399	30.8	12.32	564.62	0.852855	139	55.6	1076.93	0.606466	25759	110.633	59.0558	30.8-162.1
								20.1	8.04	1077.14	0.606318	25768.6	23.115	9.246	20.1
								11.1	4.44	1077.45	0.606106	25782.7	12.765	5.106	11.1
14.4	3.6	2671.9	0.304014									25821	10.224	2.556	14.4
34.5	8.6	2673.01	0.30488	14.7	5.88	565.625	0.852422					25860	22.464	8.9856	14.7-34.5
18.8	4.7	2674.49	0.300474									25912	13.348	3.337	18.8
22.8	5.7	2675.45	0.304196	20.4	8.16	566.325	0.852155	21.8	8.72	1080.93	0.603689	25946	21.6667	6.29481	20.4-22.8
14.3	3.6	2675.74	0.30377									25959	10.153	2.556	14.3
17.2	4.3	2677.73	0.304635									26032.5	12.212	3.053	17.2
26.9	6.7	2678.78	0.302213									26066	19.099	4.757	26.9
31.8	8	2678.98	0.301704									26072.5	22.578	5.68	31.8
								19.3	7.72	1083.9	0.602083	26095.3	22.195	8.878	19.3
49.7	12.4	2679.8	0.302049					38.3	15.32	1084.13	0.601957	26107.5	39.666	15.8664	38.3-49.7
								17.4	6.96	1084.61	0.601693	26131.1	20.01	8.004	17.4
32.8	8.2	2680.71	0.301704					33.9	13.56	1084.82	0.60158	26140.6	31.1365	12.4546	32.8-33.9
115.1	28.8	2680.95	0.30164	38.8	15.52	568.167	0.851506	22.4	8.96	1085.01	0.60148	26148.8	58.7667	27.9807	22.4-115.1
77.9	19.5	2681.89	0.300478	17.1	6.84	568.464	0.85139	55.8	22.32	1085.65	0.601124	26176.9	50.2667	21.2349	17.1-77.9
14.6	3.7	2683.2	0.299562									26214.5	10.366	2.627	14.6
17.9	4.5	2684.63	0.300675									26255	12.709	3.195	17.9
13.9	3.5	2685.72	0.30039					12.2	4.88	1088.4	0.600568	26293.5	11.9495	4.7798	12.2-13.9
172	43	2687.37	0.296982	14.7	5.88	570.184	0.850768	78	31.2	1089.44	0.600934	26339.7	88.2333	51.9442	14.7-172.0
24.3	6.1	2689.06	0.299988					11.5	4.6	1090.67	0.601367	26397.9	15.239	6.0956	11.5-24.3
55.2	13.8	2691.51	0.297987					33.2	13.28	1092.47	0.601225	26481.4	38.686	15.4744	33.2-55.2
16.1	4	2693.5	0.297261	11.4	4.56	571.938	0.85009	13.1	5.24	1093.62	0.600718	26536.4	13.5333	2.35613	11.4-16.1
26	6.5	2694.08	0.297644					36.8	14.72	1094.09	0.600503	26562.7	30.39	12.156	26.0-36.8
14.4	3.6	2694.76	0.296949									26587.5	10.224	2.556	14.4
								11	4.4	1097.32	0.599254	26723.9	12.65	5.06	11
								11.8	4.72	1100.1	0.598252	26857.7	13.57	5.428	11.8
12.8	3.2	2706.35	0.293745					10.8	4.32	1102.41	0.597037	26965.4	10.754	4.3016	10.8-12.8
53.5	13.4	2707.84	0.294433	17.2	6.88	576.324	0.848568	19.1	7.64	1103.4	0.596446	27011.7	29.9333	8.7424	17.2-53.5
								10.4	4.16	1105.06	0.595092	27091	11.96	4.784	10.4
29.3	7.3	2713.12	0.290938					32.4	12.96	1106.76	0.593441	27175.4	29.0315	11.6126	29.3-32.4
18.8	4.7	2714.11	0.290964									27205	13.348	3.337	18.8
19.4	4.9	2714.56	0.290851					30	12	1107.62	0.592658	27218.1	24.137	9.6548	19.4-30.0
16.2	4.1	2715.49	0.292092									27245	11.502	2.911	16.2
								10.5	4.2	1108.43	0.591879	27257.1	12.075	4.83	10.5
21.4	5.4	2716.53	0.290348									27272	15.194	3.834	21.4
106.9	26.7	2717.84	0.297485	11.4	4.56	579.215	0.84718	40.6	16.24	1109.58	0.590714	27311	52.9667	30.0302	11.4-106.9
26.5	6.6	2672.39	0.306955									27340.5	18.815	4.686	26.5
44.6	11.2							11	4.4	1111.04	0.589244	27382.5	22.158	8.8632	11.0-44.6
18.1	4.5	2721.73	0.287482									27420.5	12.851	3.195	18.1
22.3	5.6	2723.26	0.287242					14.9	5.96	1112.73	0.587556	27466.9	16.484	6.5936	14.9-22.3
								25.6	10.24	1113.21	0.587118	27490.8	29.44	11.776	25.6
								11.4	4.56	1113.95	0.58644	27524.5	13.11	5.244	11.4
12.4	3.1	2725.82	0.286957					19.4	7.76	1114.21	0.586199	27533.3	15.557	6.2228	12.4-19.4
26.8	6.7	2727.64	0.285883									27565.5	19.028	4.757	26.8
18.1	4.5	2734.26	0.283963	26.1	10.44	583.891	0.845952	11.2	4.48	1119.21	0.580596	27673.9	18.4667	13.5178	11.2-26.1
23.7	5.9	2737.02	0.283106					13.3	5.32	1120.7	0.578718	27714.2	16.061	6.4244	13.3-23.7
10.7	2.7	2741.02	0.282183					27.3	10.92	1122.93	0.576034	27766.7	19.496	7.7984	10.7-27.3
25.7	6.4	2742.82	0.281721	16.4	6.56	586.522	0.845257	10.9	4.36	1123.98	0.574809	27796.5	17.6667	5.14147	10.9-25.7
								11.4	4.56	1125.55	0.572999	27869.7	13.11	5.244	11.4
52	13	2747.62	0.280414	25	10	587.764	0.845141	41	16.4	1126.78	0.571524	27927.3	39.3333	6.62221	25.0-52.0
								13.2	5.28	1127.67	0.570413	27968.4	15.18	6.072	13.2
15.8	4	2756.49	0.279362									28162	11.218	2.84	15.8
				12.2	4.88	590.698	0.844382					28202.6	16.958	6.7832	12.2
74.5	18.6	2758.48	0.274309	12.9	5.16	590.829	0.84428	53.3	21.32	1132.87	0.563411	28218.4	46.9	22.9981	12.9-74.5
18.6	4.7	2758.69	0.275736									28222	13.206	3.337	18.6
30.9	7.7	2762.85	0.274797									28328.5	21.939	5.467	30.9
22.7	5.7	2763.53	0.275019									28345.5	16.117	4.047	22.7
28.6	7.2	2765.91	0.274869									28403.5	20.306	5.112	28.6
								17.6	7.04	1137.26	0.556952	28423.5	20.24	8.096	17.6
30.1	7.5	2768.06	0.270287	42.5	17	593.673	0.842936	19.6	7.84	1137.98	0.555864	28453.2	30.7333	21.4389	19.6-42.5
								14.1	5.64	1140.31	0.552444	28625.5	16.215	6.486	14.1
28.7	7.2	2773.04	0.267298					11.1	4.44	1140.58	0.552059	28639.7	16.571	6.6284	11.1-28.7
31.5	7.9	2778.41	0.271215									28779.5	22.365	5.609	31.5
14.7	3.7	2778.91	0.2699									28790	10.437	2.627	14.7
								14.3	5.72	1145.36	0.545374	28855.3	16.445	6.578	14.3
12.7	3.2	2782.61	0.267648					15	6	1145.86	0.544729	28878.3	13.1335	5.2534	12.7-15.0
134.9	33.7	2784.34	0.264781	16.8	6.72	599.02	0.84149	140.8	56.32	1146.8	0.543538	28940.4	97.5	69.3078	16.8-140.8
73.3	18.3	2797.69	0.262802									29355.5	52.043	12.993	73.3
12.3	3.1			11.8	4.72	604.813	0.839862					29449.5	12.5675	5.027	11.8-12.3
201.6	50.4	2806.6	0.257724	36.9	14.76	607.192	0.838542	175.2	70.08	1160.15	0.52363	29680.4	137.9	75.7147	36.9-201.6
								12	4.8	1160.5	0.523491	29698	13.8	5.52	12
55.1	13.8	2807.67	0.260361					29.7	11.88	1160.95	0.523364	29722.5	36.638	14.6552	29.7-55.1
								12.8	5.12	1162.34	0.523011	29800.9	14.72	5.888	12.8
62	15.5	2814.01	0.25633									29943	44.02	11.005	62
51	12.8	2822.19	0.255408					31.8	12.72	1170.17	0.525432	30243.7	36.39	14.556	31.8-51.0
								18.3	7.32	1171.12	0.525816	30309.9	21.045	8.418	18.3
16	4	2826.06	0.254082					11.7	4.68	1172.63	0.526431	30412.8	12.4075	4.963	11.7-16.0
17.4	4.4	2828.47	0.25579									30521	12.354	3.124	17.4
48	12	2829.02	0.254992	35.7	14.28	616.275	0.835697	40	16	1174.49	0.526922	30541.9	41.2333	8.13221	35.7-48.0
								18.5	7.4	1175.11	0.527102	30580.6	21.275	8.51	18.5
								14.7	5.88	1176.37	0.527648	30652.2	16.905	6.762	14.7
30	7.5	2831.99	0.253148	27.7	11.08	617.543	0.835415	15	6	1176.69	0.527805	30670.3	24.2333	11.2845	15.0-30.0
								25.5	10.2	1181.33	0.530932	30911.4	29.325	11.73	25.5
39	9.8	2840.3	0.248712					12.9	5.16	1182.26	0.531557	30970.2	21.2625	8.505	12.9-39.0
								26.6	10.64	1183.11	0.532107	31023.8	30.59	12.236	26.6
16.2	4.1	2843.8	0.247917									31110	11.502	2.911	16.2
36.7	9.2	2844.23	0.25093									31126.5	26.057	6.532	36.7
								12.1	4.84	1185.36	0.533568	31155.6	13.915	5.566	12.1
35.8	9	2845.97	0.246151					19.2	7.68	1186.04	0.533938	31200.9	23.749	9.4996	19.2-35.8
15.1	3.8	2846.14	0.245682									31207	10.721	2.698	15.1
				14.3	5.72	626.406	0.831489					31432.5	19.877	7.9508	14.3
								21.2	8.48	1190.14	0.534638	31460.2	24.38	9.752	21.2
28.2	7.1	2851.67	0.245867	65.7	26.28	626.892	0.831549	32.5	13	1190.58	0.534661	31488	42.1333	37.1828	28.2-65.7
11.9	3	2852.56	0.245529	17.5	7	627.385	0.831501	19.7	7.88	1191.31	0.534706	31536	16.3667	8.72398	11.9-19.7
15.5	3.9	2852.94	0.245385									31554	11.005	2.769	15.5
26.7	6.7	2854.78	0.244685	63.8	25.52	628.538	0.831318					31649.3	53.8195	21.5278	26.7-63.8
19.8	5	2855.07	0.244578									31659	14.058	3.55	19.8
29.7	7.4	2855.37	0.244463	19.6	7.84	628.897	0.831183	18.7	7.48	1193.57	0.534759	31672.6	22.6667	3.44043	18.7-29.7
21	5.3	2855.82	0.244293					19	7.6	1193.91	0.534753	31693.8	18.38	7.352	19.0-21.0
96.6	24.2	2856.73	0.243946	10.9	4.36	629.52	0.830889	42	16.8	1194.68	0.53474	31737.7	49.8333	26.9743	10.9-96.6
18.6	4.7	2858.72	0.243192	16	6.4	630.525	0.830475	10.5	4.2	1196.24	0.534667	31830.6	15.0333	5.57105	10.5-18.6
10.1	2.5	2861.93	0.241978					13.3	5.32	1198.65	0.53431	31981	11.233	4.4932	10.1-13.3
119.9	30	2863.12	0.241523	191	49.66	632.7	0.83	126	32.76	1199.58	0.53431	32029	145.6	21.3	119.9-191.0
11.4	2.9	2864.89	0.240853					16.2	6.48	1200.86	0.534259	32124.7	13.362	5.3448	11.4-16.2
30.8	7.7	2868.18	0.239605					29.7	11.88	1203.15	0.534182	32273.2	28.0115	11.2046	29.7-30.8
53.7	13.4	2872.29	0.238048	71.8	28.72	636.764	0.829299	42.2	16.88	1206.07	0.533448	32433	55.9	33.0173	42.2-71.8
16	4	2873.77	0.237487									32462	11.36	2.84	16
37.7	9.4	2874.63	0.237159	26.8	10.72	637.778	0.828461					32479.2	32.0095	12.8038	26.8-37.7
20.1	5	2878.2	0.235805	14.9	5.96	639.354	0.827242	15.4	6.16	1210.24	0.533135	32605.3	16.8	3.22248	14.9-20.1
29.1	7.3	2879.67	0.235247					11.7	4.68	1211.39	0.532903	32667.8	17.058	6.8232	11.7-29.1
								10.8	4.32	1211.53	0.532857	32675.5	12.42	4.968	10.8
16.5	4.1	2886.73	0.232571					23.8	9.52	1217.4	0.527943	33042.8	19.5425	7.817	16.5-23.8
								10.9	4.36	1219.43	0.526461	33177.7	12.535	5.014	10.9
63.9	16	2890.74	0.231049	23.8	9.52	645.168	0.825206	46.4	18.56	1220.11	0.525963	33220.4	44.7	10.2146	23.8-63.9
27.9	7	2891.55	0.230745					26.7	10.68	1220.74	0.525519	33258	25.257	10.1028	26.7-27.9
58.4	14.6	2891.86	0.230627	86.3	34.52	645.639	0.824644	26.7	10.68	1221.03	0.525326	33274.8	57.1333	48.7217	26.7-86.3
66.3	16.6	2893.12	0.230148	13.6	5.44	646.313	0.82384	53	21.2	1222.02	0.524659	33328.6	42.4	21.6046	13.6-66.3
97	24.3	2893.3	0.23008					42	16.8	1222.17	0.52459	33337.6	69.3	25.1126	97
18.4	4.6	2894.93	0.229461					12.2	4.88	1223.52	0.523974	33409.5	13.547	5.4188	12.2-18.4
								11.2	4.48	1225.61	0.523435	33494.2	12.88	5.152	11.2
67.3	16.8	2899.81	0.227611									33557	47.783	11.928	67.3
14.1	3.5	2901.18	0.22709									33597.5	10.011	2.485	14.1
14.7	3.7	2904.72	0.225748					13.3	5.32	1231.23	0.521683	33704.5	12.866	5.1464	13.3-14.7
20.5	5.1	2907.96	0.224521					16.8	6.72	1233.67	0.519297	33841.4	16.9375	6.775	16.8-20.5
								12.8	5.12	1233.78	0.519162	33848.7	14.72	5.888	12.8
				28.3	11.32	653.602	0.821145					33907.9	39.337	15.7348	28.3
16.9	4.2	2909.87	0.223795									33942	11.999	2.982	16.9
								17.1	6.84	1235.87	0.516411	33990	19.665	7.866	17.1
								12.8	5.12	1237.82	0.513952	34129.1	14.72	5.888	12.8
								19.5	7.8	1239.17	0.512184	34225.8	22.425	8.97	19.5
35	8.8	2919.19	0.220261									34380.5	24.85	6.248	35
22.3	5.6	2922.77	0.218903					16.1	6.44	1244.33	0.505811	34511.9	17.174	6.8696	16.1-22.3
34.7	8.7	2923.05	0.218796					13.8	5.52	1244.51	0.505606	34522.4	20.2535	8.1014	13.8-34.7
38.1	9.5	2924.05	0.21842					20.3	8.12	1245.19	0.504822	34563.7	25.198	10.0792	20.3-38.1
34.8	8.7	2925.81	0.217751					26.3	10.52	1246.36	0.503705	34632	27.4765	10.9906	26.3-34.8
69.6	17.4	2928.31	0.216804	59.9	23.96	662.298	0.816788	28	11.2	1247.95	0.503217	34715.4	52.5	25.9779	28.0-69.6
34.8	8.7	2928.76	0.21663					11.7	4.68	1248.21	0.503252	34736.4	19.0815	7.6326	11.7-34.8
43.4	10.9	2931.24	0.215693					16.4	6.56	1249.77	0.503534	34829.4	24.837	9.9348	16.4-43.4
29.2	7.3	2932.61	0.215172					22.8	9.12	1250.59	0.503725	34878.3	23.476	9.3904	22.8-29.2
15.6	3.9	2932.94	0.215045									34895	11.076	2.769	15.6
34.1	8.5	2937.2	0.21343									35056.5	24.211	6.035	34.1
83.4	20.9	2939.54	0.212544	23.5	9.4	666.881	0.814337	32.8	13.12	1254.94	0.505158	35144.4	46.5667	14.0972	23.5-83.4
14.2	3.6	2940.19	0.212299									35164.5	10.082	2.556	14.2
66.2	16.6	2945.36	0.210337									35339.5	47.002	11.786	66.2
15.1	3.8	2948.78	0.20904									35456.5	10.721	2.698	15.1
80.8	20.2	2951.09	0.208164	23.3	9.32	671.489	0.813169	38.4	15.36	1262.29	0.505688	35555	47.5	12.4974	23.3-80.8
								21.8	8.72	1263.29	0.505172	35617	25.07	10.028	21.8
38.5	9.6	2953.06	0.207418					32.5	13	1263.7	0.504966	35643.3	32.355	12.942	32.5-38.5
23	5.8	2955.91	0.206338					29.3	11.72	1265.72	0.504168	35768	25.0125	10.005	23.0-29.3
23.4	5.9	2957.19	0.20585	15	6	674.258	0.81196	17.1	6.84	1266.74	0.50391	35832.2	18.5	2.18543	15.0-23.4
18.1	4.5	2958.39	0.205397					16.7	6.68	1267.67	0.503728	35891.8	16.028	6.4112	16.7-18.1
36	9	2959.44	0.204996					30.3	12.12	1268.38	0.503605	35938	30.2025	12.081	30.3-36.0
44.2	11.1	2960.17	0.204719	12.3	4.92	675.689	0.81136	33.2	13.28	1268.94	0.503508	35971.1	29.9	10.7608	12.3-44.2
15.6	3.9	2960.7	0.204519					21.8	8.72	1269.38	0.503431	35998.5	18.073	7.2292	15.6-21.8
19.5	4.9	2963.14	0.203592									36120	13.845	3.479	19.5
85.4	21.4	2964.3	0.203154	102.1	40.84	677.631	0.810073	100.1	40.04	1272.26	0.504069	36181.3	95.8667	41.4204	85.4-102.1
14.5	3.6	2965.99	0.202515	30.4	12.16	678.377	0.809432					36265.5	26.2755	10.5102	14.5-30.4
69.5	17.4	2969.07	0.201347	20.7	8.28	680.008	0.80798	10.5	4.2	1276.2	0.505087	36414.9	33.5667	18.6685	10.5-69.5
17	4.3	2970.48	0.200811					12.8	5.12	1277.52	0.505202	36479.6	13.395	5.358	12.8-17.0
								12.4	4.96	1277.87	0.505216	36496.2	14.26	5.704	12.4
								12.5	5	1279.66	0.505242	36594.1	14.375	5.75	12.5
				21.5	8.6	683.202	0.807009					36686.7	29.885	11.954	21.5
43.3	10.8	2977.66	0.198088	26.1	10.44	684.615	0.806503	21.2	8.48	1283.85	0.504671	36780.8	30.2	5.95429	21.2-43.3
28.1	7	2977.93	0.197985									36789	19.951	4.97	28.1
18.8	4.7	2981.37	0.19668	13.5	5.4	686.406	0.806223	29.4	11.76	1286.82	0.504248	36896.1	20.5667	10.6018	13.5-29.4
84.3	21.1	2987.24	0.194455	41.6	16.64	689.596	0.805114	64.6	25.84	1291.83	0.504487	37114.9	63.5	8.97843	41.6-84.3
17.5	4.4	2987.66	0.194293					18.2	7.28	1292.19	0.504567	37135.7	16.6775	6.671	17.5-18.2
								13.6	5.44	1292.49	0.504634	37151.6	15.64	6.256	13.6
12.7	3.2	2988.24	0.194075					20.6	8.24	1292.67	0.504735	37160.9	16.3535	6.5414	12.7-20.6
								10.3	4.12	1293.26	0.505069	37189.3	11.845	4.738	10.3
								11.1	4.44	1294.7	0.505923	37257.3	12.765	5.106	11.1
				19.5	7.8	691.608	0.803371	37.8	15.12	1295.08	0.506164	37276.1	35.2875	14.115	19.5-37.8
								18.7	7.48	1295.32	0.506315	37289.5	21.505	8.602	18.7
								12.6	5.04	1296.69	0.50726	37369.7	14.49	5.796	12.6
				10.1	4.04	693.255	0.801632	33.5	13.4	1297.61	0.507917	37425.3	26.282	10.5128	10.1-33.5
				38.7	15.48	693.555	0.801407					37455	53.793	21.5172	38.7
				12.8	5.12	696.05	0.800489					37672.2	17.792	7.1168	12.8
								15.2	6.08	1302.38	0.511222	37683.4	17.48	6.992	15.2
				15	6	696.865	0.800415					37737.9	20.85	8.34	15
				10.6	4.24	697.828	0.80032	15.3	6.12	1304.83	0.513162	37817.8	16.1645	6.4658	10.6-15.3
								48.4	19.36	1306.93	0.514943	37928.2	55.66	22.264	48.4
				19.2	7.68	699.56	0.799857	74.2	29.68	1307.61	0.515534	37965.1	56.009	22.4036	19.2-74.2
				18.6	7.44	700.041	0.799727					37997.1	25.854	10.3416	18.6
				27.7	11.08	701.117	0.799437	35.9	14.36	1309.92	0.517744	38078.1	39.894	15.9576	27.7-35.9
								15.5	6.2	1310.33	0.518102	38099	17.825	7.13	15.5
				44.9	17.96	701.748	0.799267	301.3	120.52	1311.12	0.518236	38134.3	204.453	81.7812	44.9-301.3
								11.1	4.44	1312.64	0.518167	38203.9	12.765	5.106	11.1
				68.9	27.56	703.038	0.798898	36.4	14.56	1313.12	0.518134	38232	68.8155	27.5262	36.4-68.9
17	4.3	3015.94	0.18357					12	4.8	1315.61	0.517623	38346.5	12.935	5.174	12.0-17.0
21.3	5.3	3016.42	0.183387	10.7	4.28	704.774	0.798132	16.1	6.44	1316.03	0.517461	38365	16.0333	2.03438	10.7-21.3
31	7.8	3018.7	0.182522					12.3	4.92	1317.94	0.516613	38446.9	18.0775	7.231	12.3-31.0
13.1	3.3	3019.14	0.182357					12.9	5.16	1318.35	0.51647	38463.8	12.068	4.8272	12.9-13.1
29.3	7.3	3025.18	0.180068					21.7	8.68	1323.83	0.515324	38701.5	22.879	9.1516	21.7-29.3
								10.7	4.28	1325.03	0.514804	38753.7	12.305	4.922	10.7
62.1	15.5	3027.61	0.179143					33.4	13.36	1326.05	0.514395	38795.1	41.2505	16.5002	33.4-62.1
18.7	4.7	3029.66	0.178366									38880	13.277	3.337	18.7
34.1	8.5	3030.99	0.177865	33.6	13.44	712.256	0.794573	24	9.6	1329.24	0.512662	38936.3	30.5667	12.127	24.0-34.1
14.6	3.7	3032.88	0.177146									39009	10.366	2.627	14.6
				14.3	5.72	718.074	0.792347	15.3	6.12	1339.71	0.502536	39396.6	18.736	7.4944	14.3-15.3
34.5	8.6	3043.67	0.173053	19.6	7.84	719.149	0.791812	23.6	9.44	1341.78	0.500359	39493.2	25.9	1.55798	19.6-34.5
44.3	11.1	3044.24	0.172836	39.7	15.88	719.55	0.791627	62.2	24.88	1342.33	0.49975	39520.1	48.7333	20.1515	39.7-62.2
57.6	14.4	3044.44	0.172761					15.1	6.04	1342.49	0.499564	39527.8	29.1305	11.6522	15.1-57.6
								14.7	5.88	1343.9	0.497976	39592.9	16.905	6.762	14.7
11.2	2.8	3048.04	0.171397					23.5	9.4	1345.85	0.495751	39687.1	17.4885	6.9954	11.2-23.5
								15.9	6.36	1348.87	0.492032	39837.2	18.285	7.314	15.9
61.3	15.3	3052.12	0.16985					68.8	27.52	1349.51	0.491248	39867.7	61.3215	24.5286	61.3-68.8
35.8	9	3053.25	0.16942	57.2	22.88	724.369	0.789558	38.1	15.24	1350.59	0.48992	39917.2	43.7	27.502	35.8-57.2
22.7	5.7	3056.05	0.168358					12.3	4.92	1353.04	0.486878	40084.2	15.131	6.0524	12.3-22.7
								13.2	5.28	1354.39	0.485013	40170.2	15.18	6.072	13.2
66	16.5	3057.94	0.167641	47.1	18.84	726.851	0.788574	29.4	11.76	1354.56	0.484723	40182.2	47.5	15.9106	29.4-66.0
								13.2	5.28	1355.53	0.483157	40226.5	15.18	6.072	13.2
13.4	3.4	3059.69	0.16698					15.6	6.24	1356.08	0.482249	40254.9	13.727	5.4908	13.4-15.6
23.6	5.9	3059.9	0.166899	13.4	5.36	727.838	0.788216					40263	17.691	7.0764	13.4-23.6
60.7	15.2	3061.16	0.16642					26.6	10.64	1357.3	0.480229	40313.4	36.8435	14.7374	26.6-60.7
18.1	4.5	3061.7	0.166218					17.2	6.88	1357.8	0.479418	40336	16.3155	6.5262	17.2-18.1
21.2	5.3	3062.01	0.166098									40348	15.052	3.763	21.2
15.9	4	3064.43	0.165182									40456	11.289	2.84	15.9
								17.9	7.16	1364.94	0.467798	40707.2	20.585	8.234	17.9
								16.7	6.68	1365.1	0.467558	40716.6	19.205	7.682	16.7
				10.6	4.24	733.52	0.785687					40736.1	14.734	5.8936	10.6
28.4	7.1	3070.39	0.162923									40747.5	20.164	5.041	28.4
								14.1	5.64	1367.83	0.463348	40863.8	16.215	6.486	14.1
								16.1	6.44	1368.25	0.462697	40885.8	18.515	7.406	16.1
29.6	7.4	3073.5	0.161741									40893	21.016	5.254	29.6
17.6	4.4	3074.9	0.161209									40954.5	12.496	3.124	17.6
								10.8	4.32	1370.39	0.459512	40994.3	12.42	4.968	10.8
19.6	4.9	3076.4	0.16064									41008.5	13.916	3.479	19.6
								25.8	10.32	1372.55	0.457067	41133.9	29.67	11.868	25.8
125.8	31.5	3078.99	0.159661	46.5	18.6	738.172	0.783872	73	29.2	1372.72	0.456886	41144.4	81.7667	12.9816	46.5-125.8
				64.7	25.88	739.762	0.783028					41244.5	89.933	35.9732	64.7
70.2	17.6	3081.86	0.158573					97.7	39.08	1375.14	0.455264	41281.2	81.0985	32.4394	70.2-97.7
40	10	3083.89	0.1578					41.2	16.48	1376.9	0.454758	41376.9	37.89	15.156	40.0-41.2
								11.1	4.44	1378.71	0.454061	41430.8	12.765	5.106	11.1
21.4	5.4	3086.85	0.156677									41455	15.194	3.834	21.4
16.8	4.2	3092.95	0.154368									41753	11.928	2.982	16.8
								15.1	6.04	1385.33	0.452496	41782.6	17.365	6.946	15.1
10.5	2.6	3094.82	0.153655	22	8.8	746.681	0.779484	28.9	11.56	1386.55	0.452315	41854.1	20.4667	14.1799	10.5-28.9
40.3	10.1	3095.67	0.153335	15.1	6.04	747.067	0.779389					41885.5	24.801	9.9204	15.1-40.3
								14.6	5.84	1388.16	0.452232	41933.4	16.79	6.716	14.6
23	5.8	3097.71	0.152561					11.5	4.6	1389.21	0.452304	41991.6	14.7775	5.911	11.5-23.0
170.9	42.7	3098.58	0.15223	118.6	30.836	748.76	0.779389	68.8	27.52	1390.01	0.452383	42036.6	121.958	40.0918	68.8-170.9
72.3	18.1	3099.36	0.151933					16	6.4	1390.67	0.452161	42074.9	34.8665	13.9466	16.0-72.3
128.8	32.2							53.7	21.48	1391.45	0.451898	42111.2	76.6015	30.6406	53.7-128.8
14.1	3.5	3102	0.150935									42213.5	10.011	2.485	14.1
58.9	14.7	3102.66	0.150683	124.6	49.84	750.97	0.778452	59	23.6	1393.78	0.451045	42250.5	80.8333	69.5634	58.9-124.6
								10.4	4.16	1394.17	0.450914	42277.1	11.96	4.784	10.4
16.8	4.2	3105.65	0.14955									42415	11.928	2.982	16.8
74.6	18.7	3108.16	0.148598	16.9	6.76	754.034	0.776271	83	33.2	1398.61	0.449857	42560.2	58.1667	36.175	16.9-83.0
				22.1	8.84	754.939	0.776081					42642.1	30.719	12.2876	22.1
86.6	21.7	3109.9	0.147938	25.8	10.32	755.101	0.776048	145.6	58.24	1400.18	0.449439	42660.2	86	69.7563	25.8-145.6
39.7	9.9	3110.05	0.147879									42663	28.187	7.029	39.7
								19.5	7.8	1401.23	0.44912	42729.1	22.425	8.97	19.5
42.8	10.7	3113.33	0.146636	10.7	4.28	757.015	0.775689	36.7	14.68	1403.15	0.448439	42848.4	30.0667	13.7076	10.7-42.8
22.5	5.6	3113.55	0.146556					23.9	9.56	1403.36	0.448359	42860.3	21.73	8.692	22.5-23.9
				10.5	4.2	757.927	0.77546					42923.7	14.595	5.838	10.5
39.3	9.8	3115.28	0.145898					11.3	4.52	1404.95	0.447753	42944.1	20.449	8.1796	11.3-39.3
				10.6	4.24	759.428	0.775001					43042.5	14.734	5.8936	10.6
34.2	8.6	3118.8	0.144563					24.1	9.64	1408.03	0.44651	43104.1	25.9985	10.3994	24.1-34.2
39.7	9.9	3119.85	0.144165	61.8	24.72	760.753	0.774563	10.1	4.04	1408.95	0.44607	43154.9	37.2	38.9962	10.1-61.8
70.3	17.6	3121.45	0.143558	21	8.4	761.727	0.774354	42.3	16.92	1410.27	0.445412	43229.9	44.5333	11.6157	21.0-70.3
73.8	18.5	3123.38	0.142828	15.8	6.32	762.891	0.774047	22.6	9.04	1411.95	0.444478	43325.2	37.4	16.5326	15.8-73.8
20.3	5.1	3123.87	0.14264					12.2	4.88	1412.38	0.444218	43344.5	14.2215	5.6886	12.2-20.3
52.2	13.1	3125.3	0.1421					18.9	7.56	1413.67	0.443587	43424.3	29.3985	11.7594	18.9-52.2
24.7	6.2	3126.05	0.141815	16.2	6.48	764.342	0.773514					43460.5	20.0275	8.011	16.2-24.7
				10.8	4.32	765.153	0.773095					43539	15.012	6.0048	10.8
19.8	5	3127.49	0.141269					14.9	5.96	1415.63	0.443651	43550.6	15.5965	6.2386	14.9-19.8
				48.7	19.48	765.518	0.772905					43580.8	67.693	27.0772	48.7
								11.4	4.56	1416.33	0.443651	43600	13.11	5.244	11.4
				13.2	5.28	765.926	0.772721					43627	18.348	7.3392	13.2
				18.6	7.44	766.728	0.77237	13.6	5.44	1418.12	0.443532	43719.8	20.747	8.2988	13.6-18.6
				11.9	4.76	767.103	0.772206	13.1	5.24	1418.64	0.443465	43754.5	15.803	6.3212	11.9-13.1
10.8	2.7	3141.19	0.136071					11	4.4	1427.95	0.439232	44349.2	10.159	4.0636	10.8-11.0
				13.4	5.36	773.492	0.769904					44380.1	18.626	7.4504	13.4
36.9	9.2	3142.47	0.135584									44405.5	26.199	6.532	36.9
25.7	6.4	3143.95	0.135024									44467	18.247	4.544	25.7
133.6	33.4	3144.98	0.134636	20.7	8.28	774.981	0.769315	57.4	22.96	1431.28	0.435706	44508.7	63.4	32.1732	20.7-133.6
14.4	3.6	3145.16	0.134567									44516	10.224	2.556	14.4
				11.1	4.44	775.853	0.76905					44561.4	15.429	6.1716	11.1
22.8	5.7	3146.48	0.134065					11.8	4.72	1432.5	0.434334	44592	14.879	5.9516	11.8-22.8
				15.8	6.32	777.482	0.768576					44739.6	21.962	8.7848	15.8
183.5	45.9	3149.43	0.132949	274.4	109.76	777.668	0.768448	55.1	22.04	1435.08	0.431865	44778.1	171	167.681	55.1-274.4
17.7	4.4											44924	12.567	3.124	17.7
49.9	12.5	3152.8	0.131671									44971	35.429	8.875	49.9
92.1	23	3154.23	0.131125	29.9	11.96	780.58	0.76669	38.5	15.4	1439.07	0.430446	45050.2	53.5	13.0456	29.9-92.1
27.1	6.8	3160.94	0.128581					18.6	7.44	1444.65	0.422282	45456.5	20.3155	8.1262	18.6-27.1
				11.6	4.64	784.742	0.765157					45470	16.124	6.4496	11.6
				11.8	4.72	785.233	0.76499					45511.9	16.402	6.5608	11.8
227.3	56.8	3162.91	0.127833					158.5	63.4	1446.3	0.418933	45557.6	171.829	68.7316	158.5-227.3
								14.5	5.8	1446.61	0.41829	45580.4	16.675	6.67	14.5
14.4	3.6	3163.56	0.127587									45594	10.224	2.556	14.4
13.2	3.3	3164.66	0.127169					21.5	8.6	1447.72	0.415882	45660.1	17.0485	6.8194	13.2-21.5
68.9	17.2	3165.2	0.126965	85.6	34.24	787.08	0.764615	53	21.2	1448.12	0.414989	45689	69.1667	37.4651	53.0-85.6
18.8	4.7	3167.74	0.126001									45820.5	13.348	3.337	18.8
								10.8	4.32	1450.51	0.410069	45852.1	12.42	4.968	10.8
38.1	9.5	3169.07	0.1255	54.8	21.92	789.326	0.764015					45895.5	51.6115	20.6446	38.1-54.8
62.6	15.7	3170.94	0.124788	42.5	17	790.533	0.763743	54.2	21.68	1452.66	0.406748	46004.3	53.1	9.52576	42.5-62.6
27.7	6.9	3172.97	0.124022									46106.1	19.667	4.899	27.7
116.1	29	3173.14	0.123953	78.5	31.4	791.808	0.763391					46115.6	95.773	38.3092	78.5-116.1
17.4	4.4	3175.6	0.123024	26.4	10.56	793.274	0.762733	14.1	5.64	1456.26	0.401173	46243.2	19.3	13.0825	14.1-26.4
30.3	7.6	3177.74	0.122213									46355.8	21.513	5.396	30.3
								17.7	7.08	1459.3	0.396669	46448.3	20.355	8.142	17.7
27.9	7	3182.22	0.12051									46584.4	19.809	4.97	27.9
46.8	11.7	3182.64	0.120351	15.6	6.24	797.413	0.760629	17.9	7.16	1461.65	0.393313	46605.2	26.7667	7.00378	15.6-46.8
10.9	2.7	3183.28	0.12011					13.8	5.52	1462.11	0.392713	46633.3	11.8045	4.7218	10.9-13.8
369.4	92.4	3184.49	0.119649	133.5	53.4	798.493	0.759898	121	48.4	1463.06	0.391613	46685.4	207.967	62.18	121.0-369.4
18.3	4.6	3186.69	0.118817									46758.1	12.993	3.266	18.3
12.8	3.2	3188.88	0.117988					13.3	5.32	1466.37	0.388249	46828.5	12.1915	4.8766	12.8-13.3
26.5	6.6	2718.88	0.289723									46830.3	18.815	4.686	26.5
21.6	5.4	3190.88	0.117228									46943.6	15.336	3.834	21.6
19.3	4.8	3191.85	0.116862									47012.4	13.703	3.408	19.3
99.3	24.8	3191.97	0.116813					32.2	12.88	1468.92	0.386332	47023	53.7665	21.5066	32.2-99.3
20.2	5.1	3194.72	0.115772					43.1	17.24	1471.23	0.384991	47148.6	31.9535	12.7814	20.2-43.1
14.5	3.6	3195.89	0.115328					31.8	12.72	1472.29	0.384303	47204.1	23.4325	9.373	14.5-31.8
40.6	10.2	3196.11	0.115244	31.8	12.72	805.198	0.755869	30.3	12.12	1472.47	0.384181	47214.2	34.2333	7.74815	30.3-40.6
16	4	3196.82	0.114973	17.7	7.08	805.609	0.755636					47245	17.9815	7.1926	16.0-17.7
31.9	8	3197.68	0.114649					11.8	4.72	1473.81	0.383712	47285.5	18.1095	7.2438	11.8-31.9
37.6	9.4	3198.3	0.114416									47312.7	26.696	6.674	37.6
37.8	9.5	3200.45	0.1136					45	18	1476.26	0.38274	47411.8	39.294	15.7176	37.8-45.0
14.1	3.5	3200.61	0.113538									47416.2	10.011	2.485	14.1
78.8	19.7	3201.6	0.113162	24.7	9.88	808.692	0.754035	55.6	22.24	1477.25	0.382513	47465.6	53.0333	15.317	24.7-78.8
61.6	15.4	3201.93	0.113037					52.7	21.08	1477.62	0.382474	47485.8	52.1705	20.8682	52.7-61.6
								14.6	5.84	1479.44	0.382283	47588	16.79	6.716	14.6
				12	4.8	813.083	0.752169					47839.7	16.68	6.672	12
15.4	3.9	3210.3	0.109863									47939.3	10.934	2.769	15.4
21.6	5.4	3212.6	0.108991					16.4	6.56	1487.91	0.383641	48076.9	17.098	6.8392	16.4-21.6
22.1	5.5	3212.89	0.108883									48096	15.691	3.905	22.1
				56.6	22.64	816.387	0.750255					48159.3	78.674	31.4696	56.6
26.3	6.6	3214.24	0.108369					61.1	24.44	1489.75	0.385299	48189	44.469	17.7876	26.3-61.1
18.4	4.6	3215.83	0.107766									48278.6	13.064	3.266	18.4
				16.8	6.72	817.773	0.749463					48287.2	23.352	9.3408	16.8
67.9	17	3216.56	0.107491					44.2	17.68	1491.9	0.387853	48316.6	49.5195	19.8078	44.2-67.9
				23.5	9.4	818.407	0.749118					48341.2	32.665	13.066	23.5
24.2	6.1	3217.53	0.107123					12	4.8	1492.82	0.38836	48367.7	15.491	6.1964	12.0-24.2
23.8	6	3218.04	0.106928					12.4	4.96	1493.31	0.388598	48394.6	15.579	6.2316	12.4-23.8
65.2	16.3	3218.81	0.106638									48439.1	46.292	11.573	65.2
16.4	4.1	3219.66	0.106314					16.1	6.44	1494.94	0.38839	48509	15.0795	6.0318	16.1-16.4
								12.5	5	1496.58	0.386946	48623.5	14.375	5.75	12.5
43.6	10.9	3222.77	0.105136	13.4	5.36	822.069	0.748048	40.6	16.24	1497.92	0.384704	48721.6	32.5333	14.0664	13.4-43.6
								15.4	6.16	1498.69	0.383486	48775.4	17.71	7.084	15.4
								11.9	4.76	1499.49	0.382242	48826.7	13.685	5.474	11.9
18.2	4.6	3224.52	0.104472					13.9	5.56	1499.85	0.381701	48850.4	14.4535	5.7814	13.9-18.2
17.1	4.3	3224.95	0.104306					14.5	5.8	1500.28	0.381065	48876.7	14.408	5.7632	14.5-17.1
22.2	5.6	3225.18	0.10422					13.9	5.56	1500.5	0.380731	48890.2	15.8735	6.3494	13.9-22.2
17	4.3	3227.04	0.103515					13.1	5.24	1502.37	0.378704	48994.6	13.5675	5.427	13.1-17.0
229.7	57.4	3228.3	0.103037	47.7	19.08	825.964	0.74681	154.8	61.92	1503.61	0.377926	49065.4	144.067	60.6504	47.7-229.7
								18.6	7.44	1504.51	0.377374	49130	21.39	8.556	18.6
24.2	6.1	3230.99	0.102019					16.5	6.6	1506.36	0.376245	49250.7	18.0785	7.2314	16.5-24.2
36.5	9.1	3231.92	0.101664	45.7	18.28	828.544	0.745628	56.7	22.68	1507.33	0.375677	49318.1	46.3	22.2145	36.5-56.7
10.6	2.7	3233.14	0.1012					17.5	7	1508.71	0.374904	49425	13.8255	5.5302	10.6-17.5
14.9	3.7	3236.9	0.0997737									49742.7	10.579	2.627	14.9
30.2	7.6	3239.24	0.0988901									49918.7	21.442	5.396	30.2
22.2	5.6	3240.93	0.0982454									50022.3	15.762	3.976	22.2
								10.8	4.32	1519.64	0.370865	50170	12.42	4.968	10.8
15.4	3.9	3243.78	0.0971684									50203.5	10.934	2.769	15.4
84.8	21.2	3244.06	0.0970603					70.8	28.32	1520.41	0.37073	50218.8	70.814	28.3256	70.8-84.8
								11.9	4.76	1522.11	0.370706	50330.8	13.685	5.474	11.9
21.5	5.4	3247.22	0.0958601									50421.8	15.265	3.834	21.5
27.3	6.8	3247.39	0.0957956									50432.1	19.383	4.828	27.3
				12.8	5.12	840.255	0.740016					50524.5	17.792	7.1168	12.8
21.7	5.4	3249.64	0.0949423	26.6	10.64	841.611	0.739335	21.2	8.48	1526.11	0.370324	50584.6	25.4	7.9574	21.2-26.6
25.5	6.4	3251.93	0.0940758					33.9	13.56	1528.43	0.370093	50740.9	28.545	11.418	25.5-33.9
15.9	4	3252.03	0.094036									50748.5	11.289	2.84	15.9
								44	17.6	1528.65	0.370113	50756.9	50.6	20.24	44
12.8	3.2	3256.3	0.0924185					31.5	12.6	1532.62	0.370042	51028.6	22.6565	9.0626	12.8-31.5
14.9	3.7	3256.36	0.0923939									51032.8	10.579	2.627	14.9
19.7	4.9	3256.95	0.0921701									51071.8	13.987	3.479	19.7
70.6	17.7	3258.01	0.0917719					26.1	10.44	1534.37	0.370156	51146.8	40.0705	16.0282	26.1-70.6
17.2	4.3	3259.39	0.0912486									51234.2	12.212	3.053	17.2
17.6	4.4	3259.71	0.0911254					20.2	8.08	1535.95	0.370403	51252.5	17.863	7.1452	17.6-20.2
95.9	24	3260.32	0.090894	47.3	18.92	848.272	0.736692	63.4	25.36	1536.6	0.370478	51296.1	68.8667	3.6523	47.3-95.9
				14.4	5.76	849.499	0.736157					51395.7	20.016	8.0064	14.4
								11.3	4.52	1538.36	0.370767	51412.5	12.995	5.198	11.3
				12	4.8	852.015	0.734914					51621.6	16.68	6.672	12
18.5	4.6	3266.25	0.0886452									51700.5	13.135	3.266	18.5
								10.5	4.2	1542.77	0.372142	51718.3	12.075	4.83	10.5
								26.7	10.68	1544.89	0.372999	51848.8	30.705	12.282	26.7
19	4.8	3268.82	0.0876687									51861.8	13.49	3.408	19
27.6	6.9	3270.62	0.086988	21.3	8.52	856.228	0.733157					51979.3	24.6015	9.8406	21.3-27.6
				64.2	25.68	856.75	0.732979					52029.5	89.238	35.6952	64.2
96.1	24	3272.73	0.0861878	11.2	4.48	857.9	0.732587	40.2	16.08	1549.38	0.374169	52149.2	49.1667	26.4499	11.2-96.1
18.6	4.7	3273.59	0.0858635									52212	13.206	3.337	18.6
187.4	46.9	3274.45	0.0853857	182.7	73.08	859.471	0.732015	142.3	56.92	1551.55	0.375037	52301.5	170.8	62.8595	142.3-187.4
58	14.5	3274.85	0.0853857	58	23.2	859.734	0.731921					52302.7	60.9	24.36	58
28.8	7.2	3275.76	0.0850368					76.2	30.48	1552.65	0.375849	52366.7	54.039	21.6156	28.8-76.2
				24.5	9.8	861.173	0.731441					52444.4	34.055	13.622	24.5
11.2	2.8	3278.38	0.084047					17	6.8	1555.79	0.378775	52546.2	13.751	5.5004	11.2-17.0
18.8	4.7	3278.45	0.0840167									52551.1	13.348	3.337	18.8
								14.5	5.8	1556.59	0.379657	52591.5	16.675	6.67	14.5
				16.8	6.72	863.097	0.730677					52609.7	23.352	9.3408	16.8
12.9	3.2	3280.69	0.0831691					32.1	12.84	1558.45	0.381856	52697.4	23.037	9.2148	12.9-32.1
42.3	10.6	3281.16	0.0829909					46.1	18.44	1558.93	0.382369	52723.8	41.524	16.6096	42.3-46.1
				12.3	4.92	865.688	0.729457					52808.4	17.097	6.8388	12.3
				10.2	4.08	866.491	0.729126					52868.6	14.178	5.6712	10.2
16.5	4.1	3283.62	0.0820561					24.1	9.64	1561.58	0.384447	52872.6	19.715	7.886	16.5-24.1
15.5	3.9	3283.78	0.0819973									52883.4	11.005	2.769	15.5
18.4	4.6	3285.11	0.0814948									52963.9	13.064	3.266	18.4
13.6	3.4	3285.55	0.081326					35.5	14.2	1563.73	0.385393	52993.7	25.2405	10.0962	13.6-35.5
47	11.8	3287.3	0.0806624					16.7	6.68	1565.62	0.385879	53103.8	26.2875	10.515	16.7-47.0
15.4	3.9	3287.89	0.0804386									53140	10.934	2.769	15.4
								25.2	10.08	1567.64	0.385928	53221.2	28.98	11.592	25.2
14.2	3.6	3289.53	0.0798148									53238.8	10.082	2.556	14.2
95.2	23.8	3289.82	0.0797086	53.8	21.52	871.427	0.72818	72.8	29.12	1568.32	0.385863	53260.7	73.9333	8.07977	53.8-95.2
92.7	23.2	3294.02	0.0781158	127.1	50.84	874.226	0.727715	63.9	25.56	1572.16	0.385423	53493.6	94.5667	61.9057	63.9-127.1
20.7	5.2	3294.15	0.0780647									53500.8	14.697	3.69024	20.7
								16.9	6.76	1574.89	0.384704	53655.9	19.435	7.774	16.9
49.9	12.5	3297.95	0.0766217					26.2	10.48	1575.51	0.384466	53694.7	32.7795	13.1118	26.2-49.9
								11.1	4.44	1576.52	0.384029	53757	12.765	5.106	11.1
41.1	10.3	3299.16	0.0761628	41.3	16.52	877.386	0.727122	21.9	8.76	1576.65	0.383962	53765	34.7667	17.5638	21.9-41.3
								10.1	4.04	1579.65	0.382414	53941.3	11.615	4.646	10.1
								58.8	23.52	1580.78	0.38175	54022.9	67.62	27.048	58.8
73.4	18.4	3304.14	0.0742742					31.8	12.72	1581.04	0.381592	54038.9	44.342	17.7368	31.8-73.4
12.3	3.1	3306.63	0.0733319	19.1	7.64	882.276	0.725922	33	13.2	1583.34	0.380179	54177.1	24.5	9.3366	12.3-33.0
				10.7	4.28	884.746	0.725909	10.9	4.36	1586.3	0.378618	54339.5	13.704	5.4816	10.7-10.9
54.9	13.7	3309.88	0.0721012					17.1	6.84	1587.05	0.378199	54389.5	29.322	11.7288	17.1-54.9
14.8	3.7	3312.23	0.0712101					13	5.2	1589.72	0.376404	54577.8	12.729	5.0916	13.0-14.8
18.1	4.5	3312.3	0.0711797									54583.2	12.851	3.195	18.1
104.9	26.2	3315.48	0.0699757					97.4	38.96	1593.53	0.374179	54840	93.2445	37.2978	97.4-104.9
								11.2	4.48	1595.92	0.372913	54968.1	12.88	5.152	11.2
35.1	8.8	3317.84	0.0690826									54995.6	24.921	6.248	35.1
42.6	10.7	3317.95	0.069039	26.6	10.64	891.333	0.723869	30.9	12.36	1596.66	0.372588	55002.8	33.3667	3.54284	26.6-42.6
								16.5	6.6	1597.15	0.372364	55028.9	18.975	7.59	16.5
				13.2	5.28	891.985	0.723595					55051.5	18.348	7.3392	13.2
								10.3	4.12	1597.88	0.372011	55071	11.845	4.738	10.3
				33.7	13.48	893.599	0.722939	26.8	10.72	1599.95	0.371084	55202	38.8315	15.5326	26.8-33.7
								18.6	7.44	1600.94	0.370724	55267.3	21.39	8.556	18.6
11.5	2.9	3321.18	0.067814					12.6	5.04	1601.34	0.370585	55292.7	11.3275	4.531	11.5-12.6
								19.2	7.68	1601.92	0.370282	55327.7	22.08	8.832	19.2
								25.7	10.28	1602.77	0.369792	55382.3	29.555	11.822	25.7
								16.4	6.56	1605.64	0.367801	55547.3	18.86	7.544	16.4
				12.2	4.88	899.899	0.720909	19	7.6	1608.41	0.365487	55686.9	19.404	7.7616	12.2-19.0
				37.3	14.92	900.882	0.720553	89.5	35.8	1609.93	0.364224	55766.4	77.386	30.9544	37.3-89.5
				20.6	8.24	901.178	0.720456	15.3	6.12	1610.27	0.363968	55790.6	23.1145	9.2458	15.3-20.6
								11.9	4.76	1610.74	0.36353	55824	13.685	5.474	11.9
								14.5	5.8	1612.22	0.361849	55941.1	16.675	6.67	14.5
15.1	3.8	3329.05	0.0648276					20.7	8.28	1613.7	0.360319	56061.5	17.263	6.9052	15.1-20.7
								13.2	5.28	1617.06	0.357492	56330.3	15.18	6.072	13.2
				12.8	5.12	905.913	0.71872	12.4	4.96	1618.05	0.356641	56408.1	16.026	6.4104	12.4-12.8
16.9	4.2	3331.59	0.0638681					21.9	8.76	1618.41	0.356363	56433.2	18.592	7.4368	16.9-21.9
				12.8	5.12	906.81	0.718237	23.6	9.44	1619.38	0.355617	56500.5	22.466	8.9864	12.8-23.6
20.4	5.1	3332.93	0.0633581					22.5	9	1620.65	0.355396	56583.5	20.1795	8.0718	20.4-22.5
								31.6	12.64	1623.18	0.355706	56732.2	36.34	14.536	31.6
				33.5	13.4	913.024	0.716784	18.8	7.52	1627.05	0.35623	56961.7	34.0925	13.637	18.8-33.5
15.6	3.9	3337.89	0.0614752	21.5	8.6	913.22	0.716711	18.7	7.48	1627.32	0.356254	56978	18.6	9.42308	15.6-21.5
				46.5	18.6	914.165	0.716358	44	17.6	1628.49	0.356364	57050.3	57.6175	23.047	44.0-46.5
38.6	9.7	3338.86	0.0611092	96.6	38.64	914.41	0.716268	51.4	20.56	1628.88	0.356415	57077.8	62.2	54.8871	38.6-96.6
								17.3	6.92	1630.6	0.356718	57200.2	19.895	7.958	17.3
28.9	7.2	3340.35	0.0605461									57220	20.519	5.112	28.9
14.4	3.6	3340.41	0.0605233									57225.5	10.224	2.556	14.4
				18.8	7.52	916.711	0.715449					57260.1	26.132	10.4528	18.8
								55.1	22.04	1631.83	0.357095	57281.7	63.365	25.346	55.1
22.3	5.6	3342.18	0.0598483					22.8	9.12	1633.73	0.35779	57408.5	21.0265	8.4106	22.3-22.8
15.2	3.8	3342.81	0.0596132	14.1	5.64	918.947	0.714971	25.8	10.32	1634.81	0.358093	57478.2	18.3667	9.44605	14.1-25.8
18.7	4.7	3342.89	0.0595809									57484.2	13.277	3.337	18.7
22.7	5.7	3343	0.0595392	48.4	19.36	919.146	0.71494	25.2	10.08	1635.12	0.358196	57497.7	32.1	26.6123	22.7-48.4
				23.1	9.24	920.968	0.714532	31.3	12.52	1637.57	0.359124	57652.3	34.052	13.6208	23.1-31.3
								12.7	5.08	1637.87	0.359271	57670.2	14.605	5.842	12.7
								15	6	1639.34	0.359968	57763	17.25	6.9	15
								19.2	7.68	1640.67	0.360577	57836.4	22.08	8.832	19.2
				10.2	4.08	925.176	0.713753	21.4	8.56	1643.22	0.361535	57991.1	19.394	7.7576	10.2-21.4
11.3	2.8	3347.81	0.0577151					21.3	8.52	1644.01	0.361832	58035.3	16.259	6.5036	11.3-21.3
40.8	10.2	3348.86	0.0573169	65.3	26.12	927.107	0.714068	133.2	53.28	1645.91	0.362491	58179.3	79.7667	62.1063	40.8-133.2
				10.8	4.32	927.374	0.714098	12.6	5.04	1646.3	0.362611	58198.9	14.751	5.9004	10.8-12.6
								36.6	14.64	1647.16	0.362998	58240	42.09	16.836	36.6
13.5	3.4	3349.81	0.0569567	31.8	12.72	928.484	0.714019	29.2	11.68	1647.89	0.363357	58282.5	24.8333	17.7338	13.5-31.8
				10.7	4.28	929.023	0.71395	22.5	9	1648.56	0.363648	58330.3	20.374	8.1496	10.7-22.5
29.6	7.4	3350.3	0.056769	32.3	12.92	929.236	0.713842	61.4	24.56	1648.9	0.36379	58354.8	41.1	24.8026	29.6-61.4
								12.3	4.92	1651.81	0.364904	58576.8	14.145	5.658	12.3
								14.9	5.96	1652.24	0.365023	58601.7	17.135	6.854	14.9
				10.6	4.24	932.728	0.71307					58685.1	14.734	5.8936	10.6
36.9	9.2	3353.94	0.0553886									58775.5	26.199	6.532	36.9
								14.3	5.72	1657.12	0.365447	58868.9	16.445	6.578	14.3
								10.3	4.12	1659.91	0.365245	59009.1	11.845	4.738	10.3
59.8	15	3356.54	0.0544044									59035.8	42.458	10.65	59.8
50.4	12.6	3357.86	0.053902	27.2	10.88	939.558	0.712543	55	22	1662.72	0.3659	59178.8	44.2	15.3067	27.2-55.0
98.8	24.7	3359.3	0.0533597	30.6	12.24	941.269	0.71176	45.2	18.08	1665.2	0.36846	59314.9	58.2	14.0347	30.6-98.8
								20.2	8.08	1670.02	0.373136	59536.3	23.23	9.292	20.2
26.4	6.6	3361.89	0.0523775	55.3	22.12	944.611	0.709849	35.9	14.36	1670.15	0.373256	59545	39.2	29.3043	26.4-55.3
12.7	3.2	3362.48	0.0521537					28.7	11.48	1671.21	0.374243	59596.7	21.011	8.4044	12.7-28.7
57.8	14.5	3362.97	0.0519679	51.3	20.52	946.159	0.709441	104.9	41.96	1672.37	0.375298	59650.6	71.3333	40.177	51.3-104.9
								11.1	4.44	1673.33	0.376132	59696.9	12.765	5.106	11.1
				15.6	6.24	949.614	0.708471					59904.7	21.684	8.6736	15.6
								17.8	7.12	1679.32	0.379938	59989.4	20.47	8.188	17.8

## Sheet: Table S5
Period	GICC05 Age (a b2k)	WD2014 Age(a b2k)	Comments	NGRIP				NEEM			GISP2			EDC			EDML			WDC			Greenland deposition min-max (kg km-2)	Antarctica deposition min-max (kg km-2)	Global climate forcing min-max (-W m-2)	Average stratospheric aerosol loading (Tg)	Stratospheric aerosol loading min-max (Tg)	1) Average global climate forcing (W m-2)	2) Average global climate forcing (W m-2)	3) Average global climate forcing (W m-2)	Prediction of volcanic site
				Deposition_CFA (kg km-2)	1δ	Duration (yrs)	Deposition_IC (kg km-2)	Deposition (kg km-2)	1δ	Duration (yrs)	Deposition (kg km-2)	1δ	Duration (yrs)	Deposition (kg km-2)	1δ	Duration (yrs)	Deposition (kg km-2)	1δ	Duration (yrs)	Deposition (kg km-2)	1δ	Duration (yrs)
	10480.9	10405		28.8	7.488	2					312.5	81.25	10.4	10.9	2.834	6.1	78.9	20.514	4.7	79.9	20.774	3.5	28.8-312.5	10.9-79.9	4.2-11.3	153.865	39.7-258.0	-30.8	-13.9	-8.83	NHHL
	11304.5	11222.2	On AICC2012 list	313.1	81.406	3		282.4	73.424	20.1				27.3	7.098	11.2	20.1	5.226	3.7	42.8	10.7	2.7	282.4-313.1	20.1-42.8	9.3-11.0	199.784	26.8-242.7	-40	-16.55	-10.2	NHHL
GS-1	12170.4	12113	Vedde ash	205.1	53.326	3	90	400.9	104.234	22.6298	139.9	36.374	3.66401				6.9	1.794	2.77261	20.5	5.33	3	90.0-400.9	6.9-20.5	5.2-11.1	152.969	58.2-249.0	-30.5938	-13.8496	-8.80461	NHHL
	12240.7	12186		61	15.86	2	75	68.6	17.836	10.149	53.7	13.962	3.55946				22.2	5.772	3.29304	35.4	9.204	4	53.7-75.0	22.2-35.4	6.1-7.4	82.682	75.9-110.4	-16.5364	-9.18984	-6.36735	LL or SH
	12754.8	12740		224	58.24	4	27				91.7	23.842	7.28321	2	0.52	1.70401	14.4	3.744	3.26768	24.7	6.422	3	27.0-224.0	2.0-24.7	2.5-8.8	103.674	17.4-152.4	-20.7349	-10.686	-7.19995	NHHL
GI-1	12917.3	12897	Onset YD 4 spikes	336.7	87.542	5	128	215	55.9	9.51468	192.6	50.076	5.1564	36.3	9.438	6.82037	35.8	9.308	5.16668	106	27.56	4	128.0-336.7	35.8-106.0	7.4-12.0	200.78	108.8-297.9	-40.156	-16.6028	-10.0451	NHHL
	12961.3	12933	Onset YD 4 spikes	15.3	3.978	1								2.3	0.598	3.94669	5.9	1.534	2.22279	30.8	8.008	4	15.3-15.3	2.3-30.8	2.5-4.6	28.2541	17.6-46.1	-5.65082	-4.49181	-3.40424	LL or SH
	12995.1	12965	Onset YD 4 spikes	55.5	14.43	2	40				39.2	10.192	3.85231	7.2	1.872	4.51425	22.7	5.902	4.22893	59.2	15.392	5	39.2-55.5	7.2-59.2	4.6-7.6	77.05	46.4-114.7	-15.41	-8.76764	-6.12324	LL or SH
	13028.2	12998	Onset YD 4 spikes	79.9	20.774	3	74	424.7	110.422	19.0915	313.7	81.562	9.84258	81.6	21.216	13.0679	33.3	8.658	4.24732	80.2	20.852	5	74.0-424.7	33.3-81.6	6.1-12.4	220.512	75.5-323.7	-44.1023	-17.6735	-10.4918	NHHL
	13211.8	13185		42.9	11.154	3	34				32.5	8.45	5.28454	29.3	7.618	16.1011	19.6	5.096	4.22935	71.4	18.564	3	32.5-42.9	19.6-71.4	4.9-7.6	77.8	52.1-114.3	-15.56	-8.82444	-6.15633	LL or SH
	14499.8	14404		114.6	29.796	4					102.6	26.676	7.90252	5.4	1.404	3.4516	39.4	10.244	5.1829	56	14.56	4	102.6-114.6	5.4-56.0	5.5-7.8	95.502	63.9-121.3	-19.1004	-10.1168	-6.88904	NHHL
GS-2.1	14704.7	14632		55.3	14.378	2					74.8	19.448	5.87076	7.3	1.898	6.55703	35.2	9.152	5.30473	73.6	19.136	5	55.3-74.8	7.3-73.6	5.4-8.7	103.75	62.6-148.4	-20.75	-10.6912	-7.20275	LL or SH
	14760.9	14688		221	57.46	3	141	528.7	137.462	10.0951	173.8	45.188	7.15916	3	0.78	3.33956	13.2	3.432	2.72375	15.9	4.134	2	141.0-528.7	3.0-15.9	6.4-12.3	186.158	83.4-317.3	-37.2316	-15.7866	-9.69148	NHHL
	14966	14899		71.1	18.486	2	56	92.2	23.972	10.444				2.9	0.754	4.43361	47.4	12.324	5.23162	101.1	26.286	4	56.0-92.2	2.9-101.1	5.3-9.9	132.117	58.9-193.3	-26.4233	-12.5605	-8.17515	LL or SH
	15296.5	15211		170	44.2	3	92	87.2	22.672	9.27417	162.8	42.328	7.91806	2	0.52	1.77697	3	0.78	1.27984	24.6	6.396	3	87.2-170.0	2.0-24.6	4.9-7.8	89.6681	51.7-121.5	-17.9336	-9.70047	-6.65713	NHHL
	15558.6	15466		35	9.1	2	143				133	34.58	18.4843	78.2	20.332	13.9367	29.3	7.618	4.89753	109.2	28.392	6	35.0-143.0	29.3-109.2	5.5-11.1	156.233	64.3-252.2	-31.2467	-14.0459	-8.89767	LL or SH
	15669.7	15574		160.3	41.678	3	146				107.3	27.898	19.5118				8.9	2.314	2.50593	7.9	2.054	2	107.3-160.3	7.9-8.9	5.8-7.1	84.188	69.0-100.3	-16.8376	-9.3011	-6.43099	NHHL
	15682	15587	Towada-H	179.1	46.566	3	196	13.7	3.562	11.529				3.8	0.988	4.27549	3.2	0.832	1.44891	3.9	1.014	1	13.7-196.0	3.2-3.9	1.9-7.6	105.72	11.0-115.6	-21.1441	-10.8261	-7.2754	NHHL
	16333.9	16284		106.9	27.794	3	59	317.3	82.498	10.3842	138.3	35.958	9.77414	43.1	11.206	12.1667	28.5	7.41	2.98838	65.9	17.134	8	59.0-317.3	28.5-65.9	5.4-11.0	152.704	62.1-246.8	-30.5407	-13.8336	-8.79699	NHHL
	16468.9	16455		114.9	29.874	2					90.9	23.634	8.28835	95.9	24.934	12.8888	104.3	27.118	4.80436	69.2	17.992	3	90.9-114.9	69.2-104.3	9.0-10.5	192.7	160.1-219.2	-38.54	-16.1543	-9.85221	LL or SH
GS-3	24668.9	24589	Triplet	198.3	51.558	4		173.3	45.058	10.7247	147.4	38.324	28.4762	20.7	5.382	19.4472	71.3	18.538	6.64778	94.4	24.544	13	147.4-198.3	20.7-94.4	7.2-10.2	160.658	104.7-207.4	-32.1316	-14.3099	-9.02162	NHHL
	25460.3	25366	Taupo. Oruanui	158.8	41.288	3	127	220.2	57.252	19.9388				7.2	1.872	3.7	265.7	69.082	6.88205	370.1	96.226	7	127.0-220.2	7.2-370.1	8.2-15.4	382.28	137.2-590.3	-76.5	-25.5048	-13.2371	LL or SH
	25759.3	25671		116.5	30.29	2	64	230.7	59.982	20.3732	297.2	77.272	13.9672	30.8	8.008	6.81714	139	36.14	5.71414	162.1	42.146	4	64.0-297.2	30.8-162.1	5.7-12.5	233.063	67.3-331.5	-46.6126	-18.3379	-10.7595	NHHL
	25939.9	25847		97.3	25.298	5		144.8	37.648	10.3038				20.4	5.304	17.3724	6.8	1.768	1.50447	5	1.3	2	97.3-144.8	5.0-20.4	5.3-7.2	79.7318	60.5-102.9	-15.9464	-8.96992	-6.24071	NHHL
GI-3/GS-4	27796.7	27833		160.4	41.704	6	269	367.3	95.498	19.0509				16.4	4.264	10.4328	10.9	2.834	2.26261	25.6	6.656	3	160.4-367.3	10.9-25.6	7.1-10.8	168.028	102.3-235.0	-33.6056	-14.7442	-9.22277	NHHL
	28453.5	28534		79.8	20.748	3	93	201.1	52.286	9.99249	176.2	45.812	12.4229	42.5	11.05	15.1755	19.6	5.096	4.1273	30.1	7.826	3	79.8-201.1	19.6-42.5	5.6-8.9	117.582	65.1-157.1	-23.5165	-11.6215	-7.69578	NHHL
GS-5.1	28941.8	29028		88.4	22.984	3	75							16.8	4.368	8.22898	140.8	36.608	8.52798	134.8	35.048	7	75.0-88.4	16.8-140.8	6.7-10.7	185.867	91.8-229.2	-37.1733	-15.7701	-9.68422	LL or SH
	29680	29721		528.6	137.436	15	289				292.1	75.946	54.358	36.9	9.594	13.5048	175	45.5	9.54686	200.8	52.208	7	289.0-528.6	36.9-200.8	10.1-14.6	327.548	201.6-502.1	-65.5095	-23.0083	-12.4534	NHHL
	29722.4	29758		206.1	53.586	3		238.3	61.958	10.8359							29.9	7.774	5.35193	55.2	14.352	5	206.1-238.3	29.9-55.2	8.6-9.8	154.265	147.4-191.0	-30.8531	-13.9277	-8.84174	NHHL
	30243.7	30255		65.3	16.978	2		384.6	99.996	28.5617	176.2	45.812	35.2684				31.8	8.268	6.55632	50.7	13.182	5	65.3-384.6	31.8-50.7	5.8-11.5	155.234	69.0-269.9	-31.0467	-13.9859	-8.86931	NHHL
GI-5.2/GS-5.2	32032.2	31978.3		226.8	58.968	5	165	223.3	58.058	11.2245	182.3	47.398	13.0057	191	49.66	24.3523	126	32.76	8.09583	119.8	31.148	6	165.0-226.8	119.8-191.0	10.3-12.3	265.76	213.9-320.3	-53.152	-20.0152	-11.4046	NHHL
	32433.2	32476.1		29.9	7.774	3	77							71.8	18.668	11.8213	42.7	11.102	4.0671	54.4	14.144	5	29.9-77.0	42.7-71.8	5.9-8.7	86.2	72.6-148.8	-17.24	-9.4487	-6.51499	LL or SH
GS-6	33220.8	33330.8		50.1	13.026	4								23.8	6.188	13.1909	46.4	12.064	7.26433	59.4	15.444	6	50.1-50.1	23.8-59.4	6.0-7.4	93.3	73.9-109.5	-18.66	-9.96067	-6.80253	LL or SH
	33328.2	33428.1	Doublet	16.8	4.368	1	3							13.5	3.51	9.34	53	13.78	6.41633	66.6	17.316	5	3.0-16.8	13.5-66.6	5.1-6.4	59.2	16.5-83.4	-11.8	-7.35	-5.27	LL or SH
GS-7	34227.1	34430.7		86.5	22.49	5	35										19.5	5.07	4.95554				35.0-86.5	19.5-19.5	4.2-5.7	71.73	39.5-68.8	-14.346	-8.35926	-5.88318	NHHL
GI-7/GS-7	34717.8	34974.1	Doublet	107.6	27.976	3					494.4	128.544	58.1623	59.9	15.574	15.541	28	7.28	3.29379	69.7	18.122	4	107.6-494.4	28.0-69.7	6.6-12.8	224.103	89.3-351.5	-44.8207	-17.8649	-10.5696	NHHL
	35145.1	35360.9		23.7	6.162	2	13	56.3	14.638	9.56507	48.8	12.688	4.04389	23.5	6.11	16.9131	32.8	8.528	4.83641	83.5	21.71	5	13.0-56.3	23.5-83.5	4.0-8.4	89.5333	36.5-139.8	-17.9067	-9.69075	-6.65167	LL or SH
GS-8/GI-7	35556.5	35756.1		326.6	84.916	7		200.8	52.208	10.3475	181.7	47.242	9.79272	23.3	6.058	18.1747	38.4	9.984	12.5927	74.5	19.37	13	181.7-326.6	23.3-74.5	8.0-11.3	180.121	126.8-260.7	-36.0241	-15.4434	-9.53931	NHHL
GI-8	37112.6	37241.7		40.6	10.556	2	25							41.6	10.816	10.8391	64.6	16.796	8.60011	84.2	21.892	7	25.0-40.6	41.6-84.2	5.6-7.9	86.6087	66.6-124.8	-17.3217	-9.47855	-6.53192	LL or SH
	37277.1	37417.9		276.1	71.786	10					22.5	5.85	4.0566	19.5	5.07	10.3303	37.8	9.828	5.30936				22.5-276.1	19.5-37.8	3.7-9.9	120.388	32.3-195.2	-24.0777	-11.8057	-7.79123	NHHL
	37964.6	38095.8		83.3	21.658	4	105	103.5	26.91	20.3529	79.4	20.644	14.2163	19.2	4.992	14.3686	74.2	19.292	9.72159				79.4-105.0	19.2-74.2	7.0-9.5	144.742	98.6-179.2	-28.9485	-13.3485	-8.56377	LL or SH
	38133.1	38276.3		236.1	61.386	3	272	79.6	20.696	9.71549	312.5	81.25	19.0921	44.9	11.674	15.4465	301.4	78.364	10.8204				79.6-312.5	44.9-301.4	7.9-15.6	413.9	124.5-613.9	-82.78	-26.8925	-13.6401	LL or SH
GS-9	38231.6	38381		37.6	9.776	2								68.9	17.914	22.3578	36.3	9.438	10.5874				37.6-37.6	36.3-68.9	6.0-7.3	90.19	73.9-106.5	-18.038	-9.73807	-6.67823	LL or SH
	38365.5	38528.1		110	28.6	5	35	457.8	119.028	19.841	114.9	29.874	14.6752	10.7	2.782	10.5217	16	4.16	4.1831	21.2	5.512	5	35.0-457.8	10.7-21.2	3.6-11.7	145.673	30.7-282.1	-29.1346	-13.4056	-8.59148	NHHL
	39868.6	40014.9		158.5	41.21	3	206										68.8	17.888	5.29135	61	15.86	9	158.5	61.0-68.8	8.8-9.0	151.56	151.3-296.7	-30.312	-13.7644	-8.76401	NHHL
	39914.6	40068.4		137.1	35.646	3	217	355	92.3	10.3067	455.9	118.534	15.1127	57.2	14.872	16.413	38.1	9.906	6.9357	36.8	9.568	7	137.1-455.9	36.8-57.2	7.6-12.3	224.147	114.9-317.0	-44.8294	-17.8672	-10.5706	NHHL
	40183.2	40301.1		156.2	40.612	4	74	399.9	103.974	18.5256	78.4	20.384	13.4048	47.1	12.246	19.3481	29.4	7.644	5.20771	66.1	17.186	6	74.0-399.9	29.4-66.1	5.9-11.9	168.092	71.6-294.0	-33.6184	-14.748	-9.22449	NHHL
	41144.4	41342.3		180.2	46.852	11	135	760.5	197.73	21.7303	289.2	75.192	20.9805	46.5	12.09	10.3149	73	18.98	8.35695	125.9	32.734	13	135.0-760.5	46.5-125.9	7.9-15.1	315.486	123.5-559.4	-63.0972	-22.4399	-12.2637	NHHL
	41378.7	41559.5		65.1	16.926	3	35				56.4	14.664	18.5481				41.2	10.712	7.96115	42	10.92	5	35.0-65.1	41.2-42.0	6.1-7.3	99.35	76.2-107.1	-19.87	-10.3867	-7.03737	LL or SH
	42037	42247.7		178	46.28	5	87	477.4	124.124	10.7829				118.6	30.836	13.5993	68.8	17.888	9.30911	171.9	44.694	9	87.0-477.4	68.8-171.9	7.7-14.0	306.556	118.4-444.0	-61.3111	-22.0144	-12.1189	NHHL
	42111.5	42324.9		23.3	6.058	2	71										53.8	13.988	4.76269	129.3	33.618	6	23.3-71.0	53.8-129.3	6.1-10.0	100.136	77.1-200.3	-20.0273	-10.4415	-7.06726	LL or SH
	42249.7	42453.6		22.2	5.772	3	80	343.8	89.388	11.2952				124.6	32.396	16.997	59	15.34	9.58038	59.2	15.392	8	22.2-343.8	59.0-124.6	5.9-12.3	185.243	71.7-320.6	-37.0487	-15.7348	-9.66867	NHHL
	42658.1	42836.1		169.1	43.966	8	201	155.9	40.534	21.5564	74.4	19.344	14.4728	25.8	6.708	13.0783	145.6	37.856	15.1617	85.5	22.23	8	74.4-201.0	25.8-145.6	5.7-11.3	161.528	68.2-260.2	-32.3055	-14.3615	-9.0457	NHHL
	43104.4	43305.9		55	14.3	3	30	83.7	21.762	20.8217	82.9	21.554	9.61451	4.4	1.144	2.9006	24.1	6.266	5.06729	34.2	8.892	4	30.0-83.7	4.4-34.2	2.9-6.3	63.004	21.5-81.9	-12.6008	-7.66678	-5.46702	NHHL
GS-12	43326.8	43546.1		16.1	4.186	1		91.6	23.816	10.249				15.8	4.108	4.10227	22.6	5.876	4.07825	73.5	19.11	4	16.1-91.6	15.8-73.5	3.7-9.1	91.2	31.9-165.1	-18.24	-9.81064	-6.71888	LL or SH
GI-12	44507.4	44690.8		98.6	25.636	6	112							20.69	5.3794	6.79	57.4	14.924	7.81911	133.2	34.632	8	98.6-112.0	20.7-133.2	8.9-11.0	161.9	156.0-245.2	-32.4	-14.38	-9.06	LL or SH
	44743.5	44899.1		83.1	21.606	5					70.5	18.33	12.3	15.8	4.108	3.8							83.1-126.1	15.8	5.5-6.6	65.738	78.7	-13.1476	-7.887	-5.60062	NHHL
	44763	44932.6		68.4	17.784	4					270.9	70.434	14.1	274.4	71.344	21.6	55.1	14.326	5.8	183.5	47.71	6.1	68.4-270.9	55.1-274.4	6.8-13.8	340.65	306.7	-68.1	-23.62	-12.7	LL or SH
	45050.3	45193.7		25.1	6.526	2	31				77.6	20.176	26.3501	29.9	7.774	6.87997	38.5	10.01	5.19602	91.4	23.764	8	25.1-77.6	29.9-91.4	5.1-9.2	104.617	55.0-169.0	-20.9233	-10.7506	-7.23481	LL or SH
	45554.6	45666.1		612.3	159.198	6	554	849.5	220.87	50.8451	200.4	52.104	11.7256	1.1	0.286	1.90291	158.5	41.21	13.899	229.7	59.722	14	200.4-849.5	158.5-229.7	11.5-16.3	544.681	358.9-714.0	-108.936	-32.2945	-15.012	NHHL
	46002	46104.7		97.5	25.35	6	35	124.5	32.37	21.4856	101.3	26.338	11.2852	42.5	11.05	11.8953	54.2	14.092	12.874	62.9	16.354	8	35.0-124.5	42.5-62.9	5.4-8.2	114.629	62.5-133.9	-22.9258	-11.4261	-7.59373	NHHL
	46115.9	46224.9		41.2	10.712	3	76	89.9	23.374	20.6857	68.4	17.784	10.218	78.4	20.384	23.9988	102.8	26.728	21.4044	116.9	30.394	9	41.2-89.9	78.4-116.9	7.8-10.2	165.883	119.6-206.8	-33.1766	-14.6185	-9.1649	LL or SH
	46682.8	46827.5		92.9	24.154	1					117.3	30.498	17.0621	133.5	34.71	18.9205	121	31.46	14.5701	378.8	98.488	15	92.9-117.3	121.0-378.8	10.3-14.6	316.2	128.9-496.1	-63.24	-22.4737	-12.2752	LL or SH
	47023	47219.8		332.8	86.528	6	288	226	58.76	16.5499	207.5	53.95	37.012	1.6	0.416	1.45594	32.2	8.372	8.24582	123	31.98	16	207.5-332.8	1.6-123.0	7.8-12.2	197.872	119.9-312.7	-39.5745	-16.4421	-9.97637	NHHL
GS-13	47214.1	47429.2		190.1	49.426	4								31.8	8.268	7.77777	30.3	7.878	6.26115	44.6	11.596	6	190.1-190.1	30.3-44.6	8.4-8.8	107.13	138.7-153.0	-21.426	-10.9222	-7.32687	NHHL
	48440.8	48588.3		49.5	12.87	4											7	1.82	4.0579	74.3	19.318	16	49.5-49.5	7.0-74.3	5.1-7.9	76.2515	56.5-123.8	-15.2503	-8.70696	-6.08782	LL or SH
	49064.6	49209.2		114.6	29.796	4	102	176.2	45.812	30.533	204	53.04	13.4389	47.7	12.402	10.3275	154.8	40.248	13.3729	224.4	58.344	13	102.0-204.0	47.7-224.4	8.7-13.8	307.219	149.7-428.4	-61.4438	-22.0462	-12.1298	LL or SH
GS-14	49318.7	49478.5		68.5	17.81	4	105							45.7	11.882	18.3419	56.7	14.742	9.21677	36.5	9.49	8	68.5-105.0	36.5-56.7	7.2-9.1	114.8	105.0-161.7	-22.96	-11.4374	-7.59969	LL or SH
GI-14	50585.7	50601.5		100.8	26.208	4		92.3	23.998	11.8217	80.8	21.008	14.565	26.5	6.89	15.2	21.2	5.512	5.37195	21.2	5.512	5	80.8-100.8	21.2-26.5	5.7-7.3	77.2	67.3-84.0	-15.4	-8.78	-6.13	NHHL
	52030.6	52014.3		57	14.82	4	48	70.7	18.382	19.9158	43	11.18	13.9816	64.1	16.666	16.2182	37	9.62	9.98804	40.7	10.582	9	43.0-70.7	37.0-64.1	6.3-8.3	104.151	80.0-134.8	-20.8302	-10.7187	-7.21761	LL or SH
	52302.1	52246.3		343.2	89.232	7	355	177.3	46.098	29.5568	358.6	93.236	26.4175	175.1	45.526	17.6761	142.2	36.972	10.3847	238.9	62.114	25	177.3-358.6	142.2-238.9	11.0-14.0	352.437	243.3-443.3	-70.4873	-24.1595	-12.8245	NHHL
	53258.9	53304.8		142.2	36.972	5	141	132.1	34.346	21.5049	164	42.64	14.2048	53.8	13.988	11.1474	72.8	18.928	10.4158	43.7	11.362	5	132.1-164.0	43.7-72.8	7.7-9.2	140.043	119.0-166.3	-28.0085	-13.0579	-8.42191	NHHL
	54178	54497.5		80.8	21.008	4	74							19.03	4.9478	8.17	33.2	8.632	7.42466	12.6	3.276	3	74.0-80.8	12.6-33.2	5.0-6.2	70.6	54.8-79.3	-14.1	-8.27	-5.83	NHHL
GS-15.1	54389.6	54714		126.5	32.89	7	36										17	4.42	4.79474	52.8	13.728	12	36.0-126.5	17.0-52.8	4.0-7.9	100.624	37.5-124.9	-20.1248	-10.4753	-7.08571	NHHL
GS-15.2	55004.8	55268.7		20.1	5.226	4								26.6	6.916	11.2952	30.9	8.034	8.17386	39.9	10.374	5	20.1-20.1	26.6-39.9	4.6-5.3	52.5667	46.7-60.0	-10.5133	-6.79476	-4.92631	LL or SH
	55383.5	55616.5	NAAZ II	866.2	225.212	7	1955	1050.4	273.104	30.6221	1435.6	373.256	27.0336				25.7	6.682	8.05939	4.8	1.248	2	866.2-1435.6	4.8-25.7	14.6-18.2	653.399	498.5-1140.1	-130.68	-36.4603	-15.8851	NHHL
GI-16.1	57050.7	57345.9		60.4	15.704	3					78.8	20.488	19.8086	46.5	12.09	12.6408	44	11.44	6.98804				60.4-78.8	44.0-46.5	7.2-8.0	127.217	104.4-125.3	-25.4435	-12.248	-8.01762	LL or SH
	57221.9	57522.7		70.5	18.33	5	94	95.2	24.752	21.2416			37.555							28.1	7.306	5.83412	70.5-95.2	28.1-28.1	5.7-6.4	60.136	68.3-82.4	-12.0272	-7.43231	-5.32349	NHHL
	57498.5	57800.1		47.2	12.272	4	74				57.1	14.846	18.0174	48.4	12.584	11.1741	25.2	6.552	7.64163	22.7	5.902	7.98627	47.2-74.0	22.7-48.4	5.8-7.9	87.8667	69.9-122.4	-17.5733	-9.57011	-6.58371	LL or SH
GI-16.2	58181.5	58476.1		156.9	40.794	5								69.6	18.096	15.1744	133.2	34.632	7.46498	33.1	8.606	7.64904	156.9-156.9	33.1-133.2	7.9-10.5	168.066	122.5-222.6	-33.6133	-14.7465	-9.2238	NHHL
	58355.2	58645.5		90.8	23.608	3								32.3	8.398	19.7853	61.4	15.964	10.8528	28.8	7.488	10.6195	90.8-90.8	28.8-61.4	6.3-7.5	92.5893	80.6-113.2	-18.5179	-9.91003	-6.77435	NHHL
	59180.1	59448.8		12.8	3.328	1								27.2	7.072	8.88429	55	14.3	8.92385	50.9	13.234	11.9974	12.8-12.8	27.2-55.0	4.25.7	57.1283	40.0-67.8	-11.4257	-7.18238	-5.16899	LL or SH
GI-17.2	59316.6	59605.1		33.3	8.658	4								30.6	7.956	6.9817	45.2	11.752	6.9388	98.6	25.636	16.4215	33.3-33.3	30.6-98.6	5.58.2	91.4333	63.9-131.9	-18.2867	-9.82737	-6.72823	LL or SH
GS-18	59545.1	59873.7		74.6	19.396	3	115				127	33.02	30.2469	55.3	14.378	21.0373	35.9	9.334	6.35402	26.4	6.864	7.31773	74.6-127.0	26.4-55.3	5.88.0	96.656	68.9-127.7	-19.3312	-10.1981	-6.9339	NHHL
	59647.4	59992.7		129	33.54	8	192							51.3	13.338	23.3425	104.9	27.274	13.9364	59.9	15.574	11.3549	129.0-192.0	51.3-104.9	7.910.4	145.563	124.8-214.3	-29.1127	-13.3989	-8.58822	NHHL

## Sheet: Table S6
Part A: Bipolar glacial eruptions for which the source is known
Eruption name and region			Eruption time		Latitude	Longitude	VEI	Greenland ice core	Antarctic ice core	Greenland average deposition	Antarctic average deposition		References
			GICC05 (b2k)							(kg km-2)	(kg km-2)
Vedde (Katla), Iceland			12170		63°38' N	19°03' W				248.6	11.2		Grönvold et al., 1995			Lane et al., 2012
Towada-H, Japan			15670 / 15682		40°30'N	140°53'E	6			179.1	3.63333		Bourne et al., 2016
Oruanui, Taupo, New Zealand			25460.3		38°48′S	175°54′E	8			189.5	192.78		Dunbar et al., 2017
NAAZ II, Iceland			55383.5		63°41' N	19°03' W				1117.4	16.4815		Grönvold et al., 1995			Guillou et al., 2019
Part B: Bipolar historical eruptions for which the source is known
Eruption name and region			Eruption time		Latitude	Longitude	VEI	ice core		Greenland average deposition	Antarctic average deposition		References
			AD/BC							(kg km-2)	(kg km-2)
Okmok, Alaska			43 BC		53°24’N	168°6’W	6			100.6	15.4		McConnell et al., PNAS, 2020
Tierra Blanca Joven, Ilopango El Salvador			433AD		13.6°N	91°W	6			20.6	27.2		Smith et al. 2020
Samalas	Indonesia		1258 AD		8°42’S	116°24′E	7			90.4	73.4		Sigl et al., 2015	Lavigne et al., 2013		Raﬀaello et al., 2020
“Kuwae” 1458/1459			1458AD		16°48’S	168°30’E				39	63.6		Sigl et al., 2015		Gao et al., 2006		Eissen et al., 1994
Colima, Mexico			1585AD		19°3’N	103°36’W	4	NEEM S1	WDC	24.7	8.9		Sigl et al., 2013
Ruiz, Colombia			1594AD		4°54’N	75°18’W		NEEM S1	WDC	18.5	32.8		Sigl et al., 2013
Huaynaputina, Peru			1601AD		16°36’S	70°54’W	6			39.2	18.7		Sigl et al., 2015
Parker Peak, Philippines Kelut, Indonesia			1641AD		6.1°N	124°54’E				44.2	14.9		Sigl et al., 2015
Gamkonora, Indonesia			1673AD		1°22’N	127°56’E	5	NEEM S1	WDC	6.4	11.5		Sigl et al., 2013
Tambora, Indonesia			1815 AD		8°15’S	118°E	7			39.7	45.8		Sigl et al., 2015		Cole-Dai et al., 2009
Babuyan, Philippines			1831AD		19°31’N	15°8’E	4?	NEEM S1	WDC	21.9	6.9		Sigl et al., 2013
Cosiguina, Nicaragua			1834AD		12°59’N	87°34’W	5	NEEM S1	WDC	13.1	15.1		Sigl et al., 2013
Makian, Indonesia			1862AD		0.32°N	127°24’E		NEEM S1	WDC	19.3	7.1		Sigl et al., 2013
Krakatoa, Indonesia			1884AD		6°4’S	105°15’E	6	NEEM S1	WDC	18.5	11.2		Sigl et al., 2013
Agung, Indonesia			1963AD		8°21’S	115°30’E	5	NEEM S1	WDC	7.2	16.5		Sigl et al., 2013
Pinatubo, Indonesia Cerro Hudson, Chile			1991AD		15°8’N	120°21’E	6	NEEM S1	WDC	37.2	25.4		Sigl et al., 2013
Cerro Hudson			1991AD		45°54’S	75°58’ W			DML		17.3		Raﬀaello et al., 2020
Reference list on the reference sheet

## Sheet: Table S7
	Number of volcanoes detected in Greenland ice cores			Number of volcanoes detected in Antarctic ice cores
	Ice cores	# of eruptions		Ice cores	# of eruptions
	NGRIP+GISP2+NEEM	70		WDC+EDML+EDC	123
	NEEM+GISP2 only	22		WDC+EDML only	202
	NGRIP+GISP2 only	136		WDC+EDC only	19
	NGRIP+NEEM only	78		EDML+EDC only	23
	NGRIP only	528		WDC only	168
	NEEM only	152		EDML only	147
	GISP2 only	127		EDC only	58
	Total	1113		Total	740

## Sheet: Table S8
		NGRIP
		Number of volcanoes	1-year resolution	2-year resolution	3-year resolution	5-year resolution	1-year resolution with log sulfate
		Total	2911	2078	1222	985	1172
		> =20 & <68 (kg km-2)	609	567	564	382	341
		>=68 & <140 (kg km-2)	98	93	111	96	70
		>=140 (kg km-2)	41	46	45	43	33
		EDML
		Number of volcanoes	Raw resolution	2-year resolution
		> =10 & <25 (kg km-2)	324	318
		>=25 & <50 (kg km-2)	123	123
		>=50 (kg km-2)	58	60
		WDC
		Number of volcanoes	Raw resolution	2-year resolution
		Total
		> =10 & <25 (kg km-2)	640	559
		>=25 & <50 (kg km-2)	267	250
		>=50 (kg km-2)	120	119

## Sheet: reference
		Bazin et al., 2013, An optimized multi-proxies, multi-site Antarctic ice and gas orbital chronology (AICC2012): 120-800 ka, Climate of the Past, 2013
		Bigler, M.: Hochauflösende Spurenstoffmessungen an polaren Eisbohrkernen: Glazio-chemische und klimatische Prozessstudien, 2004.Ph.D. dissertation, Physics Institute, University of Bern, Switzerland, 2004.
		Fudge, T. J., Markle, B. R., Cuffey, K. M., Buizert, C., Taylor, K. C., Steig, E. J., Waddington, E. D., Conway, H., and Koutnik, M. ( 2016), Variable relationship between accumulation and temperature in West Antarctica for the past 31,000 years, Geophys. Res. Lett., 43, 3795– 3803, doi:10.1002/2016GL068356.
		C. Schott Hvidberg, D. Dahl-Jensen, E. D. Waddington, Ice flow between the Greenland Ice Core Project and Greenland Ice Sheet Project 2 boreholes in central Greenland. JOURNAL OF GEOPHYSICAL RESEARCH, VOL. 102, NO. C12, PAGES 26,851-26,859, NOVEMBER 30, 1997
		Mayewski, P. A., Meeker, L. D., Twickler, M. S., Whitlow, S., Yang, Q. Z., Lyons, W. B., and Prentice, M.: Major features and forcing of high-latitude northern hemisphere atmospheric circulation using a 110,000-year-long glaciochemical series, Journal of Geophysical Research-Oceans, 102, 26345-26366, 1997.
		Rasmussen et al., A first chronology for the North Greenland Eemian Ice Drilling (NEEM) ice core. Climate of the Past 9, 2713–2730, doi:10.5194/cp-9-2713-2013 (2013)
		Schüpbach et al., Greenland records of aerosol source and atmospheric lifetime changes from the Eemian to the Holocene, Nature Communications, 2018
		Severi, M., et al.: Synchronisation of the EDML and EDC ice cores for the last 52 kyr by volcanic signature matching, Clim. Past., 3, 367-374, 2007.
		Sigl, M., Fudge, T. J., Winstrup, M., Cole-Dai, J., Ferris, D., McConnell, J. R., . . . Sowers, T. A. (2016). The WAIS Divide deep ice core WD2014 chronology - Part 2: Annual-layer counting (0-31 ka BP). Climate of the Past, 12(3), 769-786. doi:10.5194/cp-12-769-2016
		Veres et al., 2013, Antarctic ice core chronology (AICC2012): an optimized multi-parameter and multi-site dating approach for the last 120 thousand years, Climate of the Past, 2013.
		WAIS_DIvide_Project_Members: Onset of deglacial warming in West Antarctica driven by local orbital forcing, Nature, 500, 440-444, 2013.
		Buizert, C., and 15 others. 2015. The WAIS Divide deep ice core WD2014 chronology – Part 1: Methane synchronization (68-31 ka BP) and the gas age – ice age difference Climate of the Past, 11, 153-173 \nBuizert, C., and 15 others. 2015. The WAIS Divide deep ice core WD2014 chronology – Part 1: Methane synchronization (68-31 ka BP) and the gas age – ice age difference Climate of the Past, 11, 153-1…
		Dansgaard, W., Johnsen, S. J., Clausen, H. B., Dahl-Jensen, D., Gundestrup, N. S., Hammer, C. U., Hvidberg, C. S., Steffensen, J. P., Sveinbjörnsdottir, A. E., Jouzel, J., and Bond, G.: Evidence for general instability of past climate from a 250-kyr ice-core record, Nature, 364, 218–220, 1993.
		Taylor, K. C., Alley, R. B., Lamorey, G.W., and Mayewski, P.: Electrical measurements on the Greenland Ice Sheet Project 2 Core, J. Geophys. Res., 102, 26511–26517, 1997.
		Parrenin, F., J. R. Petit, V. Masson-Delmotte, E. Wolff, I. Basile-Doelsch, J. Jouzel, V. Lipenkov, S. O. Rasmussen, J. Schwander, M. Severi, R. Udisti, D. Veres & B. M. Vinther (2012) Volcanic synchronisation between the EPICA Dome C and Vostok ice cores (Antarctica) 0-145 kyr BP. Climate of the Past, 8, 1031-1045.
		Ruth, U., Barnola, J.-M., Beer, J., Bigler, M., Blunier, T., Castellano, E., Fischer, H., Fundel, F., Huybrechts, P., Kaufmann, P., Kipfstuhl, S., Lambrecht, A., Morganti, A., Oerter, H., Parrenin, F., Rybak, O., Severi, M., Udisti, R., Wilhelms, F., and Wolff, E.: “EDML1”: a chronology for the EPICA deep ice core from Dronning Maud Land, Antarctica, over the last 150 000 years, Clim. Past, 3, 47…
		Ruth, U., Wagenbach, D., Steffensen, J. P., and Bigler, M.: Continuous record of microparticle concentration and size distribution in the central Greenland NGRIP ice core during the last glacial period, J. Geophys. Res., 108, 4098, https://doi.org/10.1029/2002jd002376, 2003.
		Siggaard-Andersen, M. L. (2004): Analysis of soluble ions from dust and sea salt over the last glacial cycle in polar deep ice cores , PhD thesis, University of Bremen.
		Rasmussen, S. O., Bigler, M., Blockley, S. P., Blunier, T., Buchardt, S. L., Clausen, H. B., . . . Winstrup, M. (2014). A stratigraphic framework for abrupt climatic changes during the Last Glacial period based on three synchronized Greenland ice-core records: refining and extending the INTIMATE event stratigraphy. Quaternary Science Reviews, 106, 14-28. doi:10.1016/j.quascirev.2014.09.007
		Albert, P. G., et al.: Evidence for a large-magnitude eruption from Campi Flegrei caldera (Italy) at 29 ka, Geology, 47, 595-599, 2019.
		Bourne, A. J., Abbott, P. M., Albert, P. G., Cook, E., Pearce, N. J. G., Ponomareva, V., Svensson, A., and Davies, S. M.: Underestimated risks of recurrent long-range ash dispersal from northern Pacific Arc volcanoes, Scientific Reports, 6, 2016.
		Baldini, J. U. L., Brown, R. J., and Mawdsley, N.: Evaluating the link between the sulfur-rich Laacher See volcanic eruption and the Younger Dryas climate anomaly, Clim. Past., 14, 969-990, 2018.
		Dunbar, N. W., Iverson, N. A., Van Eaton, A. R., Sigl, M., Alloway, B. V., Kurbatov, A. V., Mastin, L. G., McConnell, J. R., and Wilson, C. J. N.: New Zealand supereruption provides time marker for the Last Glacial Maximum in Antarctica, Scientific Reports, 7, 2017.
		Giaccio, B., Hajdas, I., Isaia, R., Deino, A., and Nomade, S.: High-precision 14C and 40Ar/39 Ar dating of the Campanian Ignimbrite (Y-5) reconciles the time-scales of climatic-cultural processes at 40 ka, Scientific Reports, 7, 2017.
		Grönvold, K., Óskarsson, N., Johnsen, S. J., Clausen, H. B., Hammer, C. U., Bond, G., and Bard, E.: Ash layers from Iceland in the Greenland GRIP ice core correlated with oceanic and land sediments, Earth Planet. Sci. Lett., 135, 149-155, 1995.
		Guillou, H., Scao, V., Nomade, S., Van Vliet-Lanoë, B., Liorzou, C., and Guðmundsson, Á.: 40 Ar/ 39 Ar dating of the Thorsmork ignimbrite and Icelandic sub-glacial rhyolites, Quaternary Science Reviews, 209, 52-62, 2019.
		Lane, C. S., Blockley, S. P. E., Mangerud, J., Smith, V. C., Lohne, Ø., Tomlinson, E. L., Matthews, I. P., and Lotter, A. F.: Was the 12.1ka Icelandic Vedde Ash one of a kind?, Quaternary Science Reviews, 33, 87-99, 2012.
		Lavigne, F., et al.: Source of the great A.D. 1257 mystery eruption unveiled, Samalas volcano, Rinjani Volcanic Complex, Indonesia, Proc. Natl. Acad. Sci. U. S. A., 110, 16742-16747, 2013.
		Svensson, A., Dahl-Jensen, D., Steffensen, J. P., Blunier, T., Rasmussen, S. O., Vinther, B. M., Vallelonga, P., Capron, E., Gkinis, V., Cook, E., Kjær, H. A., Muscheler, R., Kipfstuhl, S., Wilhelms, F., Stocker, T. F., Fischer, H., Adolphi, F., Erhardt, T., Sigl, M., Landais, A., Parrenin, F., Buizert, C., McConnell, J. R., Severi, M., Mulvaney, R., and Bigler, M.: Bipolar volcanic synchronizati…
		Cole-Dai,J.,D.Ferris,A.Lanciki,J.Savarino,M.Baroni,andM.H.Thiemens (2009), Cold decade (AD 1810–1819) caused by Tambora (1815) and another (1809) stratospheric volcanic eruption, Geophys. Res. Lett., 36, L22703, doi:10.1029/2009GL040882.
		Gao, C., A. Robock, S. Self, J. B. Witter, J. P. Steffenson, H. B. Clausen, M.-L. Siggaard-Andersen, S. Johnsen, P. A. Mayewski, and C. Ammann (2006), The 1452 or 1453 A.D. Kuwae eruption signal derived from multiple ice core records: Greatest volcanic sulfate event of the past 700 years, J. Geophys. Res., 111, D12107, doi:10.1029/2005JD006710.
		Eissen, J. P., M. Monzier, and C. Robin (1994), The forgotten volcanic eruption of Kuwae, Recherche, 25(270), 1200–1202.
		Raﬀaello Nardin, Alessandra Amore, Silvia Becagli, Laura Caiazzo, Massimo Frezzotti, Mirko Severi, Barbara Stenni and Rita: TraversiVolcanic Fluxes Over the Last Millennium as Recorded in the Gv7 Ice Core (Northern Victoria Land, Antarctica), Geosciences 2020, 10, 38
		Smith, V. C., A. Costa, G. Aguirre-Diaz, D. Pedrazzi, A. Scifo, G. Plunkett, M. Poret, P. Y. Tournigand, D. Miles, M. W. Dee, J. R. McConnell, I. Sunye-Puchol, P. D. Harris, the National Academy of Sciences of the United States of America, 117, 26061-26068.
		Joseph R. McConnell, M. S., Gill Plunkett, Andrea Burke, Woon Mi Kim, et al. (2020) Extreme climate after massive eruption of Alaska’s Okmok volcano in 43 BCE and effects on the late Roman Republic and Ptolemaic Kingdom. PNAS.
		Zdanowicz, C. M., G. A. Zielinski, M. S. Germani & .. (1999) Mount Mazama eruption: Calendrical age verified and atmospheric impact assessed. Geology, 27, 621-624.
		Abbott, P. M., & Davies, S. M. (2012). Volcanism and the Greenland ice-cores: the tephra record. Earth-Science Reviews, 115(3), 173-191. doi:10.1016/j.earscirev.2012.09.001
		Bourne, A. J., Cook, E., Abbott, P. M., Seierstad, I. K., Steffensen, J. P., Svensson, A., . . . Davies, S. M. (2015). A tephra lattice for Greenland and a reconstruction of volcanic events spanning 25-45 ka b2k. Quaternary Science Reviews, 118, 122-141. doi:10.1016/j.quascirev.2014.07.017
		Davies, S.M., Wastegård, S., Abbott, P.M., Barbante, C., Bigler, M., Johnsen, S.J., Rasmussen, T.L., Steffensen, J.P., Svensson, A., 2010. Tracing volcanic events in the NGRIP ice-core and synchronising North Atlantic marine records during the last glacial period. Earth and Planetary Science Letters 294, 69–79.
		Grönvold, K.,Óskarsson, N.,Johnsen, S.J., Clausen, H.B., Hammer, C.U.,Bond, G., Bard, E., 1995. Ash layers from Iceland in the Greenland GRIP ice core correlated with oceanic and land sediments. Earth and Planetary Science Letters 135, 149–155.
		Mortensen, A.K., Bigler, M., Grönvold, K., Steffensen, J.P., Johnsen, S.J., 2005. Volcanic ash layers from the Last Glacial Termination in the NGRIP ice core. Journal of Quaternary Science 20, 209–219.
		Röthlisberger, R., Bigler, M., Hutterli, M., Sommer, S., Stauffer, B., Junghans, H. G., and Wagenbach, D.: Technique for continuous high-resolution analysis of trace substances in firn and ice cores, Environmental Science & Technology, 34, 338-342, 2000.
